# Supplementary material
Source: PubMed Central journal article supplement (PMC3192943)
Supplement: NIHMS317710-supplement-Nanavati_Supplemental_Data.pdf [file NIHMS317710-supplement-Nanavati_Supplemental_Data.pdf]

## **Supplementary Table Legends**

**Supplementary Table 1:** The functional classification of the proteins (as described in Collins et al. 2006) found in hippocampal post synaptic density proteome. Shaded rows distinguish those proteins that were quantified based on criteria described in Materials and Methods.

**Supplementary Table 2:** Protein data from lithium-treated versus controls; comparisons of summed peptide intensities with effect sizes. Effect sizes (Cohen's  $d$ ) were calculated using  $2t/\sqrt{df_{\text{error}}}$ , where 0.8 is considered a large effect, 0.5 moderate, and 0.2 small. Proteins are sorted from largest to smallest effect size using absolute values. Positive effect sizes indicate higher levels on lithium. The  $p$  value shown in table is calculated by two tailed T- test as described in protein quantification and statistical analyses section of Materials and Methods.

**Supplementary Table 3:** Protein data from valproate-treated versus controls; comparisons of summed peptide intensities with effect sizes. Effect sizes (Cohen's  $d$ ) were calculated using  $2t/\sqrt{df_{\text{error}}}$ , where 0.8 is considered a large effect, 0.5 moderate, and 0.2 small. Proteins are sorted from largest to smallest effect size using absolute values. Positive effect sizes indicate higher levels on valproate. The  $p$  value shown in table is calculated by two tailed T- test as described in protein quantification and statistical analyses section of Materials and Methods.

**Supplementary Table 4:** The top five non-canonical networks of proteins identified by Ingenuity Pathway Analysis.

**Supplementary Table 5:** Concentration (log<sub>2</sub>-fold) changes of major scaffolding proteins of post synaptic density protein complex purified from hippocampus of lithium and valproate treated rats.

Supplementary table 1

| Protein Name                                      | Rat only Uniprot accession numbers | Molecular weight (Daltons) | Control Peptides | Control 1 % coverage | Control 2 Peptides % coverage | Control 3 Peptides % coverage | Control 3 % coverage | Total Control Spectral Hits | Valproate 1 Peptides % coverage | Valproate 2 Peptides % coverage | Valproate 3 Peptides % coverage | Valproate 3 % coverage | Total Valproate Spectral hits | Lithium Peptides | Lithium 1 % coverage | Lithium 2 Peptides % coverage | Lithium 3 Peptides % coverage | Lithium 3 % coverage | Total Lithium Spectral Hits | Description |      |      |                                                             |                                                              |                                                |                                             |
|---------------------------------------------------|------------------------------------|----------------------------|------------------|----------------------|-------------------------------|-------------------------------|----------------------|-----------------------------|---------------------------------|---------------------------------|---------------------------------|------------------------|-------------------------------|------------------|----------------------|-------------------------------|-------------------------------|----------------------|-----------------------------|-------------|------|------|-------------------------------------------------------------|--------------------------------------------------------------|------------------------------------------------|---------------------------------------------|
| <b>CHANNELS AND RECEPTORS</b>                     |                                    |                            |                  |                      |                               |                               |                      |                             |                                 |                                 |                                 |                        |                               |                  |                      |                               |                               |                      |                             |             |      |      |                                                             |                                                              |                                                |                                             |
| <b>GLUTAMATE RECEPTORS</b>                        |                                    |                            |                  |                      |                               |                               |                      |                             |                                 |                                 |                                 |                        |                               |                  |                      |                               |                               |                      |                             |             |      |      |                                                             |                                                              |                                                |                                             |
| GRIA2_RAT                                         | P19491                             | 99252.39                   | 9                | 13.8                 | 15                            | 23.1                          | 12                   | 19.5                        | 131                             | 12                              | 20.5                            | 14                     | 23.2                          | 13               | 21.7                 | 128                           | 13                            | 21.5                 | 15                          | 23.7        | 14   | 23   | 156                                                         | Glutamate receptor 2                                         |                                                |                                             |
| GRIA1_RAT                                         | P19490                             | 102312.53                  | 7                | 11.9                 | 9                             | 13.7                          | 10                   | 15                          | 83                              | 12                              | 21.7                            | 14                     | 22.2                          | 11               | 16.8                 | 97                            | 11                            | 16.9                 | 12                          | 16.9        | 8    | 12.5 | 92                                                          | Glutamate receptor 1                                         |                                                |                                             |
| GRIA3_MOUSE                                       | Q922W9                             | 100933.94                  | 3                | 5.4                  | 3                             | 5.4                           | 3                    | 5.4                         | 58                              | 5                               | 9.6                             | 4                      | 8                             | 4                | 6.6                  | 3                             | 5.4                           | 4                    | 8                           |             |      | 8    | 74                                                          | Glutamate receptor 3                                         |                                                |                                             |
| GRIIA4_HUMAN                                      | P48058                             | 101547.84                  | 2                | 3.1                  | 3                             | 4.1                           | 3                    | 4.1                         | 50                              | 2                               | 3.1                             | 2                      | 3.1                           | 2                | 3.1                  | 39                            | 2                             | 3.1                  | 3                           | 4.1         | 2    | 3.1  | 63                                                          | Glutamate receptor 4                                         |                                                |                                             |
| NMD2B_MOUSE                                       | Q01097                             | 167563.68                  | 10               | 8.9                  | 13                            | 11.6                          | 11                   | 10.2                        | 155                             | 11                              | 9.1                             | 10                     | 10.1                          | 14               | 13.9                 | 120                           | 12                            | 11.9                 | 12                          | 11.7        | 11   | 10.6 | 152                                                         | Glutamate [NMDA] receptor subunit epsilon-2                  |                                                |                                             |
| NMD2L_RAT                                         | P35439                             | 105509                     | 8                | 7.9                  | 10                            | 10.6                          | 14                   | 14.9                        | 98                              | 4                               | 4.9                             | 4                      | 4.8                           | 5                | 6.6                  | 66                            | 7                             | 8                    | 14                          | 16.4        | 9    | 10.3 | 77                                                          | Glutamate [NMDA] receptor subunit zeta-1                     |                                                |                                             |
| NMD2E1_RAT                                        | Q00959                             | 166674.87                  | 2                | 2.3                  | 5                             | 4.6                           | 7                    | 7.5                         | 28                              | 3                               | 3.7                             | 6                      | 6.8                           | 8                | 8.6                  | 3                             | 3                             | 6                    | 6.1                         |             |      | 3    | 6                                                           | 6.1                                                          | 37                                             | Glutamate [NMDA] receptor subunit epsilon-1 |
| GRM3_RAT                                          | P31422                             | 100777.56                  | 3                | 5.1                  | 2                             | 3.8                           | 2                    | 3.8                         | 22                              | 2                               | 3.8                             | 2                      | 3.8                           | 2                | 3.8                  | 28                            | 2                             | 3.8                  | 2                           | 3.8         | 3    | 5.1  | 37                                                          | Metabotropic glutamate receptor 3                            |                                                |                                             |
| GRM2_RAT                                          | P31421                             | 97274.06                   | 2                | 2.6                  | 2                             | 2.6                           | 1                    | 1.7                         | 17                              | 2                               | 2.6                             | 2                      | 2.6                           | 2                | 2.6                  | 24                            | 1                             | 1.7                  | 2                           | 2.6         | 3    | 3.8  | 21                                                          | Metabotropic glutamate receptor 2                            |                                                |                                             |
| GRM5_RAT                                          | P31424                             | 133966.93                  | 2                | 4.2                  | 3                             | 5.2                           | 2                    | 4.4                         | 15                              | 3                               | 5.2                             | 2                      | 4.4                           | 3                | 5.2                  | 2                             | 4.4                           | 1                    | 3.4                         |             |      | 3    | 12                                                          | Metabotropic glutamate receptor 5                            |                                                |                                             |
| GRM7_RAT                                          | P35400                             | 103781.6                   | 1                | 1.7                  | 2                             | 3.1                           | 1                    | 1.7                         | 7                               | 1                               | 1.7                             | 1                      | 1.7                           | 3                | 1                    | 1.7                           | 1                             | 1.3                  | 1                           | 1.7         | 1    | 1.7  | 5                                                           | Metabotropic glutamate receptor 7                            |                                                |                                             |
| GRM1_RAT                                          | P23385                             | 134163.91                  | 1                | 0.8                  | 1                             | 0.8                           | 1                    | 0.8                         | 8                               | 0                               | 0                               | 0                      | 0                             | 0                | 0                    | 0                             | 1                             | 0.8                  | 1                           | 0.8         | 0    | 0    | 6                                                           | Metabotropic glutamate receptor 1                            |                                                |                                             |
| <b>OTHER LIGAND RECEPTORS</b>                     |                                    |                            |                  |                      |                               |                               |                      |                             |                                 |                                 |                                 |                        |                               |                  |                      |                               |                               |                      |                             |             |      |      |                                                             |                                                              |                                                |                                             |
| LPNH1_RAT                                         | O88917                             | 164609.3                   | 1                | 1.2                  | 2                             | 1.3                           | 1                    | 0.7                         | 13                              | 0                               | 0                               | 1                      | 0.7                           | 0                | 2                    | 1                             | 0.7                           | 1                    | 0.7                         | 2           | 1.3  | 11   | 11                                                          | Letrophilin-1                                                |                                                |                                             |
| GABR2_RAT                                         | O88871                             | 106779.99                  | 1                | 2.3                  | 3                             | 5.5                           | 2                    | 3.7                         | 15                              | 2                               | 4.1                             | 3                      | 5.2                           | 2                | 4.1                  | 15                            | 2                             | 3.7                  | 2                           | 2.4         | 4    | 6.6  | 16                                                          | Gamma-aminobutyric acid type B receptor subunit 2            |                                                |                                             |
| SCG1_RAT                                          | P23978                             | 67755.4                    | 1                | 3.5                  | 1                             | 3.5                           | 1                    | 3.5                         | 14                              | 1                               | 3.5                             | 1                      | 3.5                           | 1                | 3.5                  | 14                            | 1                             | 3.5                  | 1                           | 3.5         | 1    | 3.5  | 12                                                          | Sodium- and chloride-dependent GABA transporter 1            |                                                |                                             |
| GBR3_RAT                                          | P63079                             | 54422.95                   | 2                | 6.1                  | 1                             | 3.6                           | 1                    | 3.6                         | 7                               | 1                               | 3.6                             | 1                      | 3.6                           | 7                | 1                    | 3.6                           | 1                             | 3.6                  | 2                           | 6.1         |      |      | 7                                                           | Gamma-aminobutyric acid receptor subunit beta-3              |                                                |                                             |
| GABR1_RAT                                         | Q920U4                             | 109334.93                  | 0                | 0                    | 2                             | 3.1                           | 1                    | 1.6                         | 5                               | 0                               | 0                               | 0                      | 0                             | 0                | 1                    | 1.6                           | 0                             | 0                    | 1                           | 1.6         | 0    | 1.6  | 3                                                           | Gamma-aminobutyric acid type B receptor subunit 1            |                                                |                                             |
| <b>Ca2+ ATPases</b>                               |                                    |                            |                  |                      |                               |                               |                      |                             |                                 |                                 |                                 |                        |                               |                  |                      |                               |                               |                      |                             |             |      |      |                                                             |                                                              |                                                |                                             |
| AT2B1_RAT                                         | P11505                             | 139601.26                  | 6                | 4.5                  | 4                             | 2.9                           | 5                    | 3.6                         | 54                              | 7                               | 7.1                             | 9                      | 9.1                           | 5                | 5.3                  | 71                            | 7                             | 5.9                  | 4                           | 3.4         | 4    | 3.7  | 60                                                          | Plasma membrane calcium-transferring ATPase 1                |                                                |                                             |
| AT2B2_RAT                                         | P11506                             | 137986.87                  | 5                | 3.9                  | 4                             | 3.2                           | 5                    | 3.9                         | 39                              | 4                               | 3.3                             | 4                      | 3.8                           | 3                | 3.2                  | 43                            | 7                             | 4                    | 4.7                         | 3           | 3.1  | 46   | Plasma membrane calcium-transferring ATPase 2               |                                                              |                                                |                                             |
| AT2B3_RAT                                         | Q64568                             | 135255.58                  | 4                | 2.7                  | 4                             | 3.2                           | 4                    | 2.7                         | 36                              | 3                               | 2.1                             | 4                      | 4.3                           | 2                | 2                    | 41                            | 6                             | 4                    | 4.8                         | 2           | 2    | 44   | Plasma membrane calcium-transferring ATPase 3               |                                                              |                                                |                                             |
| AT2A2_RAT                                         | P11507                             | 111064.81                  | 0                | 0                    | 4                             | 5.4                           | 1                    | 1.1                         | 10                              | 3                               | 4.4                             | 5                      | 7.7                           | 3                | 4.3                  | 23                            | 3                             | 4.2                  | 1                           | 1.5         | 0    | 0    | 10                                                          | Sarcoplasmic/endoplasmic reticulum calcium ATPase 2          |                                                |                                             |
| <b>Na/K ATPase</b>                                |                                    |                            |                  |                      |                               |                               |                      |                             |                                 |                                 |                                 |                        |                               |                  |                      |                               |                               |                      |                             |             |      |      |                                                             |                                                              |                                                |                                             |
| AT1A3_RAT                                         | P06687                             | 113102.45                  | 14               | 19                   | 15                            | 22                            | 16                   | 22.8                        | 235                             | 13                              | 17                              | 18                     | 24.6                          | 18               | 24.6                 | 240                           | 14                            | 18.6                 | 13                          | 19          | 17   | 23.6 | 259                                                         | Sodium/potassium-transferring ATPase subunit alpha-3         |                                                |                                             |
| AT1A2_RAT                                         | P06686                             | 113456.96                  | 11               | 14                   | 14                            | 18.7                          | 12                   | 16.3                        | 209                             | 11                              | 13.7                            | 11                     | 14.4                          | 12               | 14.8                 | 190                           | 9                             | 12.1                 | 12                          | 16          | 14   | 18.5 | 214                                                         | Sodium/potassium-transferring ATPase subunit alpha-2         |                                                |                                             |
| AT1A1_RAT                                         | P06685                             | 114221.3                   | 10               | 12.8                 | 11                            | 15.5                          | 10                   | 14.3                        | 178                             | 11                              | 14.6                            | 10                     | 13.3                          | 10               | 13.3                 | 180                           | 10                            | 13.3                 | 13                          | 17.6        | 11   | 15.1 | 212                                                         | Sodium/potassium-transferring ATPase subunit alpha-1         |                                                |                                             |
| AT1B1_RAT                                         | P07340                             | 35571.11                   | 4                | 12.8                 | 4                             | 12.8                          | 4                    | 12.8                        | 82                              | 4                               | 12.8                            | 5                      | 16.4                          | 5                | 16.4                 | 68                            | 4                             | 12.8                 | 4                           | 12.8        | 4    | 12.8 | 71                                                          | Sodium/potassium-transferring ATPase subunit beta-1          |                                                |                                             |
| <b>VOLTAGE &amp; LIGAND GATED CALCIUM CHANNEL</b> |                                    |                            |                  |                      |                               |                               |                      |                             |                                 |                                 |                                 |                        |                               |                  |                      |                               |                               |                      |                             |             |      |      |                                                             |                                                              |                                                |                                             |
| CCG8_RAT                                          | Q8VHW5                             | 43825.26                   | 2                | 7.8                  | 3                             | 8.3                           | 3                    | 8.3                         | 26                              | 1                               | 3.5                             | 2                      | 4                             | 3                | 8.3                  | 16                            | 2                             | 4                    | 2                           | 4           | 2    | 4    | 20                                                          | Voltage-dependent calcium channel gamma-8 subunit            |                                                |                                             |
| CAC3A_MOUSE                                       | Q8R054                             | 58169.29                   | 1                | 2.3                  | 3                             | 5.6                           | 2                    | 3.7                         | 12                              | 3                               | 7.5                             | 3                      | 7.5                           | 2                | 6.2                  | 11                            | 3                             | 5.6                  | 2                           | 3.7         | 2    | 3.7  | 13                                                          | Voltage-dependent L-type calcium channel subunit beta-4      |                                                |                                             |
| CACR1_RAT                                         | P54283                             | 65748.66                   | 1                | 2                    | 4                             | 8.2                           | 3                    | 6.5                         | 15                              | 3                               | 6.5                             | 3                      | 6.5                           | 2                | 5.4                  | 10                            | 4                             | 8.2                  | 2                           | 3.2         | 3    | 6.5  | 16                                                          | Voltage-dependent L-type calcium channel subunit beta-1 B    |                                                |                                             |
| CACR3_RAT                                         | P54287                             | 54763.48                   | 2                | 4.8                  | 3                             | 6                             | 2                    | 3.9                         | 13                              | 2                               | 3.9                             | 3                      | 8.1                           | 2                | 6.6                  | 9                             | 3                             | 6                    | 2                           | 3.9         | 2    | 3.9  | 13                                                          | Voltage-dependent L-type calcium channel subunit beta-3 B    |                                                |                                             |
| CAC1A_MOUSE                                       | P97445                             | 269244.28                  | 1                | 0.9                  | 3                             | 1.9                           | 1                    | 0.9                         | 9                               | 1                               | 0.9                             | 1                      | 0.9                           | 1                | 0.9                  | 8                             | 2                             | 1.5                  | 0                           | 2           | 1.5  | 7    | Voltage-dependent P/Q-type calcium channel subunit alpha-1A |                                                              |                                                |                                             |
| CACR2_RAT                                         | Q8VGC3                             | 67842.47                   | 1                | 2                    | 3                             | 4.8                           | 2                    | 3.2                         | 12                              | 2                               | 3.2                             | 2                      | 3.2                           | 1                | 2                    | 7                             | 3                             | 4.8                  | 2                           | 3.2         | 3    | 6.5  | 14                                                          | Voltage-dependent L-type calcium channel subunit beta-2      |                                                |                                             |
| CA2D1_RAT                                         | P54290                             | 125691.86                  | 1                | 1.2                  | 2                             | 2.5                           | 1                    | 1.2                         | 8                               | 1                               | 1.2                             | 1                      | 1.2                           | 5                | 1                    | 1.2                           | 2                             | 2.8                  | 1                           | 1.2         | 1    | 1.2  | 10                                                          | Voltage-dependent calcium channel subunit alpha-2/delta-1    |                                                |                                             |
| CAC1E_MOUSE                                       | Q61290                             | 259180.49                  | 0                | 0                    | 2                             | 1.6                           | 0                    | 0                           | 3                               | 2                               | 1.6                             | 1                      | 0.7                           | 0                | 0                    | 4                             | 0                             | 0                    | 1                           | 0.9         | 0    | 0    | 1                                                           | Voltage-dependent R-type calcium channel subunit alpha-1E    |                                                |                                             |
| CA2D3_RAT                                         | Q8CF65                             | 124073.64                  | 0                | 0                    | 0                             | 1                             | 1.6                  | 3                           | 1                               | 1.6                             | 1                               | 1.6                    | 1                             | 1.6              | 4                    | 1                             | 1.6                           | 0                    | 0                           | 0           | 0    | 0    | 2                                                           | Voltage-dependent calcium channel subunit alpha-2/delta-3    |                                                |                                             |
| <b>VOLTAGE GATED POTASSIUM CHANNEL</b>            |                                    |                            |                  |                      |                               |                               |                      |                             |                                 |                                 |                                 |                        |                               |                  |                      |                               |                               |                      |                             |             |      |      |                                                             |                                                              |                                                |                                             |
| KCN1A_RAT                                         | P10499                             | 56799.6                    | 2                | 6.9                  | 3                             | 9.5                           | 4                    | 12.9                        | 40                              | 3                               | 9.5                             | 4                      | 12.9                          | 3                | 9.5                  | 48                            | 2                             | 6.9                  | 2                           | 6.9         | 3    | 9.5  | 31                                                          | Potassium voltage-gated channel subfamily A member 1         |                                                |                                             |
| KCD16_MOUSE                                       | Q5DTY9                             | 49961.75                   | 2                | 3.7                  | 3                             | 6.5                           | 3                    | 6.3                         | 29                              | 2                               | 4.7                             | 3                      | 6.3                           | 4                | 9.1                  | 24                            | 2                             | 4.9                  | 2                           | 3.7         | 2    | 4.9  | 20                                                          | BTB/POZ domain-containing protein                            |                                                |                                             |
| KCN2A_RAT                                         | P63142                             | 57136.64                   | 1                | 1.8                  | 3                             | 7.2                           | 4                    | 10.8                        | 15                              | 2                               | 4.4                             | 5                      | 13.6                          | 2                | 4.4                  | 24                            | 1                             | 1.8                  | 2                           | 4.6         | 2    | 4.4  | 9                                                           | Potassium voltage-gated channel subfamily A member 2         |                                                |                                             |
| KCN2B_RAT                                         | P15384                             | 64485.34                   | 1                | 1.6                  | 2                             | 3.8                           | 4                    | 9.4                         | 14                              | 2                               | 3.8                             | 4                      | 9.4                           | 2                | 3.8                  | 22                            | 1                             | 1.6                  | 1                           | 1.6         | 2    | 3.8  | 8                                                           | Potassium voltage-gated channel subfamily A member 3         |                                                |                                             |
| KCAB2_RAT                                         | P62483                             | 41280.15                   | 2                | 6                    | 1                             | 3.3                           | 3                    | 12.3                        | 17                              | 2                               | 8.7                             | 2                      | 8.7                           | 2                | 8.7                  | 17                            | 1                             | 3.3                  | 2                           | 11.2        | 2    | 6.8  | 11                                                          | Voltage-gated potassium channel subunit beta-2               |                                                |                                             |
| <b>VOLTAGE DEPENDENT AMION CHANNEL</b>            |                                    |                            |                  |                      |                               |                               |                      |                             |                                 |                                 |                                 |                        |                               |                  |                      |                               |                               |                      |                             |             |      |      |                                                             |                                                              |                                                |                                             |
| VDAC1_RAT                                         | Q92210                             | 32502.44                   | 12               | 48                   | 17                            | 56.8                          | 17                   | 64.5                        | 1096                            | 15                              | 54.1                            | 19                     | 67.6                          | 19               | 72                   | 872                           | 16                            | 54.1                 | 16                          | 59.5        | 16   | 61.8 | 1074                                                        | Voltage-dependent anion-selective channel protein 1          |                                                |                                             |
| VDAC2_RAT                                         | P81155                             | 32339.81                   | 10               | 40                   | 12                            | 44.4                          | 12                   | 47.1                        | 744                             | 11                              | 47.1                            | 12                     | 47.1                          | 13               | 48.5                 | 703                           | 13                            | 47.1                 | 14                          | 56.6        | 12   | 44.4 | 791                                                         | Voltage-dependent anion-selective channel protein 2          |                                                |                                             |
| VDAC3_RAT                                         | Q9R120                             | 31177.53                   | 8                | 27.9                 | 11                            | 35                            | 12                   | 37.8                        | 578                             | 10                              | 32.2                            | 12                     | 37.8                          | 11               | 37.8                 | 542                           | 11                            | 32.2                 | 11                          | 35          | 11   | 32.2 | 621                                                         | Voltage-dependent anion-selective channel protein 3          |                                                |                                             |
| <b>CALCIUM RELEASE CHANNEL</b>                    |                                    |                            |                  |                      |                               |                               |                      |                             |                                 |                                 |                                 |                        |                               |                  |                      |                               |                               |                      |                             |             |      |      |                                                             |                                                              |                                                |                                             |
| RVR2_HUMAN                                        | Q92736                             | 569626.29                  | 0                | 0                    | 0                             | 0                             | 0                    | 0                           | 0                               | 1                               | 0.2                             | 2                      | 0.4                           | 1                | 0.2                  | 7                             | 0                             | 0                    | 1                           | 0.2         | 0    | 0    | 1                                                           | 1                                                            | Ryanodine receptor 2                           |                                             |
| <b>SODIUM CHANNEL</b>                             |                                    |                            |                  |                      |                               |                               |                      |                             |                                 |                                 |                                 |                        |                               |                  |                      |                               |                               |                      |                             |             |      |      |                                                             |                                                              |                                                |                                             |
| SCN2A_RAT                                         | P04775                             | 229993.73                  | 0                | 0                    | 0                             | 0                             | 0                    | 0                           | 0                               | 0                               | 0                               | 1                      | 0.8                           | 1                | 0.8                  | 2                             | 1                             | 0.8                  | 1                           | 0.8         | 0    | 0    | 3                                                           | Sodium channel protein type 2 subunit alpha                  |                                                |                                             |
| <b>OTHER CHANNEL AND RECEPTORS</b>                |                                    |                            |                  |                      |                               |                               |                      |                             |                                 |                                 |                                 |                        |                               |                  |                      |                               |                               |                      |                             |             |      |      |                                                             |                                                              |                                                |                                             |
| BAIP2_RAT                                         | Q6GMN2                             | 59373.96                   | 13               | 28                   | 18                            | 47.5                          | 20                   | 52.3                        | 190                             | 14                              | 38.9                            | 14                     | 34.2                          | 16               | 37.9                 | 161                           | 16                            | 38.1                 | 15                          | 40.6        | 18   | 43.2 | 190                                                         | Brain-specific angiogenesis inhibitor 1-associated protein 2 |                                                |                                             |
| CNR1_RAT                                          | Q5M7A7                             | 18766.57                   | 0                | 0                    | 0                             | 0                             | 1                    | 6.7                         | 1                               | 1                               | 1                               | 1                      | 1.1                           | 1                | 6.7                  | 6                             | 1                             | 6.7                  | 0                           | 0           | 0    | 0    | 0                                                           | 1                                                            | CB1 cannabinoid receptor-interacting protein 1 |                                             |
| RA1_MOUSE                                         | Q130D1                             | 17600.21                   | 0                | 0                    | 0                             | 0                             | 1                    | 1.1                         | 2                               | 0                               | 0                               | 1                      | 1.1                           | 1                | 1.1                  | 2                             | 1                             | 1.1                  | 0                           | 0           | 0    | 0    | 0                                                           | 0                                                            | 1                                              | Brain-specific angiogenesis inhibitor 1     |
| NA2_MOUSE                                         | P48768                             | 101387.57                  | 2                | 4.1                  | 2                             | 4.1                           | 2                    | 4.1                         | 22                              | 3                               | 5.2                             | 2                      | 4.1                           | 2                | 4.1                  | 33                            | 2                             | 4.1                  | 1                           | 1.8         | 2    | 4.1  | 16                                                          | Sodium/calcium exchanger 2                                   |                                                |                                             |
| IRK4_RAT                                          | P52190                             | 50095.05                   | 0                | 0                    | 1                             | 2.9                           | 1                    | 2.9                         | 3                               | 0                               | 0                               | 1                      | 2.9                           | 1                | 2.9                  | 2                             | 1                             | 2.9                  | 0                           | 0           | 0    | 0    | 0                                                           | 2                                                            | Inward rectifier potassium channel 4           |                                             |
| FXD1_RAT                                          | P59649                             | 8517.34                    | 1                | 20.5                 | 1                             | 20.5                          | 0                    | 4                           | 1                               | 20.5                            | 1                               | 20.5                   | 1                             | 20.5             | 4                    | 1                             | 20.5                          | 0                    | 0                           | 1           | 20.5 | 2    | 2                                                           | FXD domain-containing ion transport regulator                |                                                |                                             |
| S12A5_RAT                                         | Q63633                             | 127470.45                  | 4                | 4.4                  | 2                             | 2.6                           | 2                    | 2.6                         | 16                              | 3                               | 3.6                             | 4                      | 4.4                           | 2                | 3                    | 17                            | 2                             | 2.6                  | 4                           | 4.5         | 3    | 3.4  | 19                                                          | Solute carrier family 12 member 5                            |                                                |                                             |
| EAA2_RAT                                          |                                    |                            |                  |                      |                               |                               |                      |                             |                                 |                                 |                                 |                        |                               |                  |                      |                               |                               |                      |                             |             |      |      |                                                             |                                                              |                                                |                                             |



|                                                   |        |           |    |      |    |      |    |      |     |     |      |      |      |      |      |      |     |      |      |      |      |      |      |                                                                 |                                                                              |                                                                      |
|---------------------------------------------------|--------|-----------|----|------|----|------|----|------|-----|-----|------|------|------|------|------|------|-----|------|------|------|------|------|------|-----------------------------------------------------------------|------------------------------------------------------------------------------|----------------------------------------------------------------------|
| KALRN_RAT                                         | P97924 | 339924.68 | 1  | 0.4  | 2  | 1    | 2  | 1    | 17  | 1   | 0.4  | 2    | 1    | 1    | 0.4  | 16   | 1   | 0.4  | 2    | 1    | 2    | 0.7  | 17   | Kalirin                                                         |                                                                              |                                                                      |
| IQEC2_MOUSE                                       | Q5DU25 | 162663.23 | 10 | 8.9  | 11 | 8.3  | 9  | 8.5  | 76  | 6   | 6.8  | 8    | 7.2  | 9    | 11   | 48   | 10  | 9.6  | 7    | 5.8  | 7    | 7.8  | 73   | IQ motif and SEC7 domain-containing protein 2                   |                                                                              |                                                                      |
| IQEC1_MOUSE                                       | Q8R052 | 108803.53 | 6  | 6.1  | 7  | 7.5  | 5  | 5.3  | 47  | 4   | 4.6  | 8    | 10.5 | 6    | 8.8  | 37   | 8   | 9.8  | 4    | 3.7  | 5    | 6.6  | 37   | IQ motif and SEC7 domain-containing protein 1                   |                                                                              |                                                                      |
| AGAP2_RAT                                         | Q8C0U4 | 125102.75 | 3  | 3    | 4  | 4.6  | 3  | 6.7  | 16  | 2   | 3.4  | 2    | 5.3  | 3    | 6.9  | 9    | 4   | 5.8  | 1    | 2.8  | 1    | 0.7  | 6    | 6-AT-GAP, GTPase, ANK repeat and PH domain-containing protein 2 |                                                                              |                                                                      |
| IQEC3_RAT                                         | Q7M6M8 | 130419.89 | 2  | 2.3  | 1  | 0.7  | 2  | 2.3  | 15  | 2   | 2.7  | 2    | 2.3  | 1    | 1.7  | 7    | 3   | 3.6  | 1    | 1.7  | 1    | 0.7  | 8    | IQ motif and SEC7 domain-containing protein 3                   |                                                                              |                                                                      |
| K1688_MOUSE                                       | P59281 | 126267.92 | 1  | 0.9  | 1  | 0.9  | 1  | 0.9  | 7   | 2   | 1.8  | 1    | 0.9  | 1    | 0.9  | 6    | 1   | 0.9  | 0    | 0    | 2    | 1.8  | 5    | Uncharacterized protein KIAA1688                                |                                                                              |                                                                      |
| PSD3_MOUSE                                        | Q2PF07 | 116664.2  | 1  | 2    | 2  | 3.4  | 2  | 3.4  | 17  | 2   | 3.4  | 2    | 3.4  | 2    | 3.4  | 23   | 2   | 3.4  | 2    | 3.4  | 3    | 4.1  | 23   | PH and SEC7 domain-containing protein 3                         |                                                                              |                                                                      |
| PSD1_RAT                                          | Q9ESQ7 | 110360.4  | 1  | 0.9  | 1  | 0.9  | 1  | 0.9  | 6   | 1   | 0.9  | 0    | 0    | 0    | 0    | 0    | 1   | 0    | 0    | 0    | 0    | 1    | 0.9  | 2                                                               | PH and SEC7 domain-containing protein 1                                      |                                                                      |
| GRFP1_RAT                                         | P28818 | 143774.42 | 1  | 1.4  | 1  | 1.4  | 1  | 1.4  | 6   | 1   | 1.4  | 1    | 1.4  | 1    | 1.4  | 8    | 1   | 1.4  | 1    | 1.4  | 1    | 1.4  | 1    | 1.4                                                             | 6                                                                            | Ras-specific guanine nucleotide-releasing factor 1                   |
| RG5A_MOUSE                                        | P28908 | 130900.78 | 1  | 3.4  | 1  | 3.4  | 1  | 3.4  | 1   | 3.4 | 1    | 3.4  | 1    | 3.4  | 1    | 3.4  | 0   | 0    | 0    | 0    | 0    | 0    | 3.4  | 46                                                              | Heat shock cognate 71 kDa protein                                            |                                                                      |
| RG5T_RAT                                          | P49803 | 54821.68  | 1  | 1.9  | 1  | 1.9  | 0  | 0    | 4   | 0   | 0    | 1    | 1.9  | 0    | 0    | 1    | 1.9 | 0    | 0    | 0    | 1    | 1.9  | 1    | 1.9                                                             | 3                                                                            | Regulator of G-protein signaling 7                                   |
| RG517_MOUSE                                       | Q9Q200 | 24970.83  | 1  | 3.8  | 1  | 3.8  | 1  | 3.8  | 13  | 1   | 3.8  | 2    | 10   | 1    | 3.8  | 14   | 2   | 10   | 2    | 10   | 2    | 10   | 15   | 15                                                              | Regulator of G-protein signaling 17                                          |                                                                      |
| SYGP1_RAT                                         | Q94Q86 | 145600.4  | 23 | 20.8 | 29 | 27.6 | 31 | 32.2 | 947 | 28  | 28.1 | 23   | 23   | 30   | 30   | 757  | 30  | 31   | 30   | 27.7 | 27   | 28.3 | 862  | Ras GTPase-activating protein SynGAP                            |                                                                              |                                                                      |
| <b>SIGNALING MOLECULES AND ENZYMES</b>            |        |           |    |      |    |      |    |      |     |     |      |      |      |      |      |      |     |      |      |      |      |      |      |                                                                 |                                                                              |                                                                      |
| <b>HEAT SHOCK PROTEINS/CHAPERONES/CHAPERONINS</b> |        |           |    |      |    |      |    |      |     |     |      |      |      |      |      |      |     |      |      |      |      |      |      |                                                                 |                                                                              |                                                                      |
| GRP78_RAT                                         | P06761 | 72469.58  | 1  | 2.6  | 1  | 2.4  | 0  | 5    | 2   | 4.4 | 3    | 6.3  | 2    | 2.6  | 6    | 2    | 2.6 | 1    | 2.4  | 2    | 2.6  | 2    | 2.6  | 21                                                              | 78 kDa glucose-regulated protein                                             |                                                                      |
| DIU11_MOUSE                                       | Q5U458 | 63539.92  | 1  | 1.6  | 2  | 3.9  | 3  | 7.3  | 9   | 1   | 1.6  | 2    | 3.9  | 2    | 5.2  | 8    | 1   | 1.6  | 2    | 5.7  | 1    | 2.1  | 1    | 2.1                                                             | 7                                                                            | DnaJ homolog subfamily C member 11                                   |
| HSP70_RAT                                         | P63018 | 71424.45  | 15 | 27.7 | 19 | 29.4 | 17 | 29.4 | 516 | 19  | 30.2 | 21   | 32.3 | 21   | 32.3 | 529  | 19  | 30.2 | 17   | 26.9 | 18   | 30   | 48   | 48                                                              | Heat shock cognate 71 kDa protein                                            |                                                                      |
| HSP12A_HUMAN                                      | Q43301 | 75216.61  | 1  | 1.9  | 2  | 3.9  | 1  | 1.2  | 5   | 3   | 5    | 3    | 5    | 3    | 5    | 15   | 3   | 5    | 2    | 3.9  | 3    | 5.8  | 11   | 11                                                              | Heat shock 70 kDa protein 12A                                                |                                                                      |
| CH60_RAT                                          | P63039 | 61240.49  | 1  | 3.1  | 2  | 5.8  | 2  | 6.3  | 10  | 2   | 5.8  | 3    | 9.4  | 2    | 5.8  | 9    | 1   | 2.6  | 1    | 3.7  | 2    | 5.8  | 4    | 4                                                               | 60 kDa heat shock protein, Mitochondrial                                     |                                                                      |
| GRP75_RAT                                         | P48721 | 73969.88  | 1  | 2.2  | 0  | 0    | 1  | 2.2  | 2   | 1   | 2.2  | 2    | 0    | 0    | 0    | 0    | 1   | 0    | 0    | 1    | 1.9  | 1    | 2.2  | 2                                                               | 2                                                                            | Stress-70 protein, Mitochondrial                                     |
| MTCH2_MOUSE                                       | Q791V5 | 33996.1   | 3  | 9.6  | 4  | 15.2 | 5  | 17.5 | 63  | 5   | 20.5 | 6    | 22.8 | 6    | 22.8 | 62   | 6   | 22.8 | 5    | 17.5 | 5    | 17.5 | 79   | 79                                                              | Mitochondrial carrier homolog 2                                              |                                                                      |
| <b>PHOSPHODIESTERASES</b>                         |        |           |    |      |    |      |    |      |     |     |      |      |      |      |      |      |     |      |      |      |      |      |      |                                                                 |                                                                              |                                                                      |
| CN37_RAT                                          | P13233 | 47637.37  | 13 | 28.1 | 15 | 31.4 | 14 | 30.5 | 317 | 15  | 36   | 13   | 32.6 | 15   | 36   | 287  | 15  | 30.7 | 14   | 31.2 | 15   | 31.4 | 303  | 2,3'-cyclic-nucleotide 3'-phosphodiesterase                     |                                                                              |                                                                      |
| ENPP6_RAT                                         | B08ND0 | 51010.6   | 4  | 9.3  | 6  | 16.4 | 6  | 17.3 | 102 | 4   | 11.4 | 5    | 14.8 | 5    | 13.9 | 85   | 6   | 17.3 | 6    | 17.5 | 7    | 19.8 | 119  | 119                                                             | Ectonucleotide pyrophosphatase/phosphodiesterase family member 6 O           |                                                                      |
| PDE2A_RAT                                         | Q01062 | 106193.3  | 3  | 4.4  | 3  | 5    | 2  | 3.6  | 19  | 2   | 4.5  | 2    | 3.1  | 3    | 4.3  | 10   | 4   | 6.6  | 4    | 5.9  | 4    | 5.8  | 39   | 39                                                              | cGMP-dependent 3',5'-cyclic phosphodiesterase                                |                                                                      |
| <b>SECRETED/SECRETORY/SIGNALING</b>               |        |           |    |      |    |      |    |      |     |     |      |      |      |      |      |      |     |      |      |      |      |      |      |                                                                 |                                                                              |                                                                      |
| PGCB_RAT                                          | P55068 | 97536.69  | 2  | 2.7  | 2  | 2.8  | 2  | 2.7  | 14  | 2   | 2.7  | 1    | 1.9  | 2    | 4.4  | 14   | 2   | 3.5  | 1    | 0.8  | 1    | 1.9  | 15   | 15                                                              | Brevican core protein                                                        |                                                                      |
| NOE1_RAT                                          | Q62609 | 55649.59  | 1  | 2.3  | 2  | 5.2  | 1  | 2.3  | 23  | 1   | 2.3  | 1    | 2.3  | 1    | 2.3  | 5    | 1   | 2.3  | 1    | 2.3  | 1    | 2.3  | 20   | 20                                                              | Noelin                                                                       |                                                                      |
| CSPG2_RAT                                         | Q9ER84 | 301873.62 | 4  | 1.8  | 5  | 2.2  | 4  | 1.8  | 70  | 3   | 1.5  | 6    | 2.6  | 3    | 1.5  | 57   | 3   | 1.5  | 5    | 2.2  | 5    | 2.2  | 64   | 64                                                              | Vesicular core protein (Fragments)                                           |                                                                      |
| <b>ATP SYNTHASES</b>                              |        |           |    |      |    |      |    |      |     |     |      |      |      |      |      |      |     |      |      |      |      |      |      |                                                                 |                                                                              |                                                                      |
| VATB2_RAT                                         | P62815 | 56856.98  | 10 | 29   | 14 | 40.5 | 14 | 36.8 | 299 | 13  | 33.7 | 13   | 30.1 | 14   | 37   | 309  | 12  | 35.6 | 14   | 40.5 | 13   | 33.7 | 328  | 328                                                             | V-type proton ATPase subunit B                                               |                                                                      |
| VATA_MOUSE                                        | P50516 | 68624.68  | 8  | 16.9 | 9  | 24   | 10 | 23.7 | 179 | 9   | 23   | 15   | 36.3 | 16   | 33.9 | 211  | 13  | 30.8 | 9    | 21.6 | 9    | 21.7 | 175  | 175                                                             | V-type proton ATPase catalytic subunit A                                     |                                                                      |
| VADD1_MOUSE                                       | P51863 | 40759.39  | 4  | 13.4 | 4  | 13.4 | 4  | 13.4 | 69  | 3   | 13.4 | 6    | 18.5 | 4    | 13.4 | 63   | 5   | 13.4 | 3    | 8.3  | 5    | 16.2 | 63   | 63                                                              | V-type proton ATPase subunit d                                               |                                                                      |
| ATPA_RAT                                          | P15999 | 59830.66  | 10 | 20.4 | 6  | 15.2 | 7  | 17   | 102 | 9   | 23   | 6    | 15.2 | 11   | 28.4 | 114  | 8   | 21   | 8    | 21   | 7    | 17   | 107  | 107                                                             | ATP synthase subunit alpha, Mitochondrial                                    |                                                                      |
| ATPB_RAT                                          | P10719 | 56524.61  | 5  | 14   | 7  | 20.4 | 5  | 13.4 | 44  | 4   | 12.3 | 8    | 23.3 | 5    | 14.7 | 48   | 7   | 18.9 | 8    | 22.1 | 8    | 22.5 | 78   | 78                                                              | ATP synthase subunit beta, Mitochondrial                                     |                                                                      |
| VATH_MOUSE                                        | Q8R8E3 | 56272.39  | 2  | 5    | 3  | 9.7  | 3  | 9.7  | 18  | 2   | 5    | 3    | 9.7  | 3    | 9.7  | 34   | 3   | 9.7  | 2    | 7.9  | 3    | 9.7  | 32   | 32                                                              | V-type proton ATPase subunit H                                               |                                                                      |
| ATPS1_RAT                                         | P21571 | 12486.58  | 1  | 21.3 | 0  | 0    | 1  | 21.3 | 5   | 1   | 21.3 | 1    | 21.3 | 1    | 21.3 | 6    | 1   | 21.3 | 0    | 0    | 1    | 21.3 | 4    | 4                                                               | ATP synthase-coupling factor 6                                               |                                                                      |
| ATPO_RAT                                          | Q06647 | 23439.8   | 2  | 11.7 | 1  | 5.2  | 1  | 5.2  | 13  | 0   | 1    | 5.2  | 2    | 14.1 | 4    | 1    | 5.2 | 1    | 6.6  | 1    | 5.2  | 4    | 4    | 4                                                               | ATP synthase subunit O, Mitochondrial                                        |                                                                      |
| CISD1_RAT                                         | B0K020 | 12260.22  | 4  | 38   | 4  | 38.9 | 4  | 42.6 | 40  | 4   | 42.6 | 5    | 42.6 | 4    | 42.6 | 36   | 3   | 30.6 | 3    | 38.9 | 4    | 38.9 | 30   | 30                                                              | CDGSH iron sulfur domain-containing protein 1                                |                                                                      |
| VATF_RAT                                          | P50408 | 13389.99  | 0  | 0    | 1  | 20.2 | 2  | 36.1 | 3   | 0   | 0    | 2    | 25.2 | 1    | 20.2 | 3    | 2   | 36.1 | 1    | 20.2 | 1    | 16   | 8    | 8                                                               | V-type proton ATPase subunit F                                               |                                                                      |
| VATE1_RAT                                         | Q6PCU2 | 26179.87  | 3  | 16.8 | 3  | 16.8 | 3  | 16.8 | 97  | 3   | 16.8 | 4    | 20.8 | 3    | 16.8 | 109  | 3   | 16.8 | 3    | 16.8 | 3    | 16.8 | 106  | 106                                                             | V-type proton ATPase subunit E                                               |                                                                      |
| VWPI1_RAT                                         | P75286 | 97065.43  | 8  | 13.2 | 9  | 12.6 | 13 | 19.1 | 155 | 11  | 14.6 | 13   | 18   | 12   | 14.6 | 166  | 10  | 14.6 | 10   | 14.2 | 11   | 18   | 151  | 151                                                             | V-type proton ATPase 116 kDa subunit a isoform 1                             |                                                                      |
| VATC1_RAT                                         | Q575V6 | 44128.98  | 3  | 9.2  | 0  | 1.8  | 1  | 1.8  | 9   | 0   | 1    | 1.8  | 0    | 0    | 1    | 1.8  | 1   | 1.8  | 1    | 2.4  | 2    | 6.1  | 15   | 15                                                              | V-type proton ATPase subunit C                                               |                                                                      |
| ATAD3_RAT                                         | Q3KR0E | 66888.6   | 1  | 1.4  | 2  | 3.2  | 3  | 7.3  | 9   | 1   | 3.6  | 1    | 1.4  | 3    | 7.3  | 10   | 2   | 4.9  | 4    | 8.8  | 2    | 4.9  | 16   | 16                                                              | ATAD family AAA domain-containing protein 3                                  |                                                                      |
| <b>NADH-UBIQUINONE OXIDOREDUCTASE</b>             |        |           |    |      |    |      |    |      |     |     |      |      |      |      |      |      |     |      |      |      |      |      |      |                                                                 |                                                                              |                                                                      |
| NDUAA1_MOUSE                                      | Q62425 | 9320.87   | 4  | 47.6 | 2  | 26.8 | 2  | 26.8 | 86  | 4   | 47.6 | 2    | 26.8 | 2    | 26.8 | 65   | 2   | 26.8 | 4    | 37.8 | 2    | 26.8 | 61   | 61                                                              | NADH dehydrogenase [ubiquinone] 1 alpha subcomplex subunit 4                 |                                                                      |
| NDUV2_RAT                                         | P19324 | 27703.01  | 1  | 5.2  | 1  | 5.2  | 1  | 5.2  | 30  | 1   | 5.2  | 1    | 5.2  | 1    | 5.2  | 12   | 1   | 5.2  | 2    | 9.7  | 1    | 5.2  | 38   | 38                                                              | NADH dehydrogenase [ubiquinone] flavoprotein 2, Mitochondrial                |                                                                      |
| NDUAA_MOUSE                                       | Q9DC05 | 20435.25  | 2  | 16.9 | 2  | 16.9 | 2  | 16.9 | 13  | 1   | 10.5 | 1    | 10.5 | 1    | 10.5 | 7    | 1   | 10.5 | 1    | 6.4  | 2    | 16.9 | 9    | 9                                                               | NADH dehydrogenase [ubiquinone] 1 alpha subcomplex subunit 8                 |                                                                      |
| NDU5_MOUSE                                        | Q9DC02 | 30301.6   | 1  | 4.9  | 3  | 14.1 | 1  | 4.9  | 16  | 0   | 1    | 4.9  | 0    | 0    | 1    | 4.9  | 6   | 1    | 4.9  | 4    | 18.3 | 2    | 9.1  | 30                                                              | 30                                                                           | NADH dehydrogenase [ubiquinone] iron-sulfur protein 3, Mitochondrial |
| NDU1_RAT                                          | Q66H41 | 80330.94  | 3  | 4.5  | 9  | 16   | 7  | 11.7 | 38  | 0   | 2    | 3.9  | 1    | 1.8  | 5    | 4    | 6.6 | 9    | 16.8 | 5    | 7.3  | 59   | 59   | NADH-ubiquinone oxidoreductase 75 kDa subunit, Mitochondrial    |                                                                              |                                                                      |
| NDUAA_RAT                                         | Q56150 | 40752.75  | 1  | 3.1  | 2  | 3.9  | 2  | 9.3  | 21  | 1   | 3.9  | 2    | 9.3  | 0    | 0    | 5    | 3   | 10.1 | 4    | 9.9  | 2    | 9.3  | 22   | 22                                                              | NADH dehydrogenase [ubiquinone] 1 alpha subcomplex subunit 10, Mitochondrial |                                                                      |
| NDUAD_MOUSE                                       | Q9ERS2 | 16848.61  | 1  | 6.2  | 1  | 6.2  | 1  | 6.2  | 17  | 0   | 1    | 6.2  | 4    | 6.2  | 4    | 6.2  | 4   | 6.2  | 1    | 6.2  | 1    | 6.2  | 23   | 23                                                              | NADH dehydrogenase [ubiquinone] 1 alpha subcomplex subunit 13                |                                                                      |
| NDUBA_MOUSE                                       | Q9DC59 | 21295.55  | 0  | 0    | 1  | 8    | 1  | 8    | 6   | 1   | 8    | 1    | 8    | 1    | 8    | 1    | 8   | 1    | 8    | 1    | 8    | 1    | 8    | 4                                                               | 4                                                                            | NADH dehydrogenase [ubiquinone] 1 beta subcomplex subunit 10         |
| NDUA9_RAT                                         | Q58K63 | 41899.96  | 0  | 0    | 1  | 3.5  | 2  | 10.8 | 5   | 0   | 1    | 3.5  | 3    | 3.5  | 3    | 3.5  | 3   | 3.5  | 3    | 9.2  | 2    | 10.8 | 16   | 16                                                              | NADH dehydrogenase [ubiquinone] 1 alpha subcomplex subunit 9, Mitochondrial  |                                                                      |
| NDUV3_RAT                                         | Q9PC08 | 11934.27  | 1  | 19.4 | 1  | 19.4 | 1  | 19.4 | 7   | 0   | 1    | 19.4 | 0    | 0    | 1    | 19.4 | 0   | 1    | 19.4 | 0    | 0    | 1    | 19.4 | 1                                                               | 1                                                                            | NADH dehydrogenase [ubiquinone] flavoprotein 3, Mitochondrial        |
| NDUV1_MOUSE                                       | Q91Y10 | 51469.05  | 1  | 2.2  | 2  | 5.8  | 4  | 9.5  | 13  | 0   | 1    | 3.7  | 0    | 0    | 1    | 3.7  | 3   | 8    | 3    | 8    | 3    | 8    | 12   | 12                                                              | NADH dehydrogenase [ubiquinone] flavoprotein 1, Mitochondrial                |                                                                      |
| NDUC2_MOUSE                                       | Q9C054 | 14211.25  | 1  | 10.8 | 1  | 10.8 | 2  | 11.7 | 10  | 0   | 0    | 0    | 0    | 0    | 0    | 0    | 1   | 10.8 | 1    | 10.8 | 1    | 10.8 | 8    | 8                                                               | 8                                                                            | NADH dehydrogenase [ubiquinone] 1 subunit C2                         |
| <b>POLYUBIQUITIN</b>                              |        |           |    |      |    |      |    |      |     |     |      |      |      |      |      |      |     |      |      |      |      |      |      |                                                                 |                                                                              |                                                                      |
| VCIPI1_RAT                                        | Q8CF97 | 135604.37 | 0  | 0    | 1  | 1.7  | 1  | 1.7  | 4   | 1   | 1.7  | 1    | 1.7  | 1    | 1.7  | 3    | 1   | 1.7  | 0    | 0    | 1    | 1.7  | 2    | 2                                                               | 2                                                                            | Deubiquitinating protein                                             |
| UBP2L_MOUSE                                       | Q80X50 | 114579.31 | 1  | 2.3  | 0  | 0    | 1  | 2.3  | 2   | 0   | 0    | 1    | 2.3  | 3    | 2.3  | 3    | 1   | 2.3  | 0    | 0    | 1    | 2.3  | 2    | 2                                                               | 2                                                                            | Ubiquitin-associated protein 2                                       |
| UBIQ_RAT                                          | P62989 | 8559.62   | 1  | 21.1 | 1  | 21.1 | 1  | 21.1 | 28  | 2   | 23.7 | 2    | 23.7 | 2    | 23.7 | 30   | 2   | 23.7 | 1    | 21.1 | 2    | 23.7 | 39   | 39                                                              | 39                                                                           | Ubiquitin                                                            |
| <b>DEVELOPMENT</b>                                |        |           |    |      |    |      |    |      |     |     |      |      |      |      |      |      |     |      |      |      |      |      |      |                                                                 |                                                                              |                                                                      |
| CCNY_MOUSE                                        | Q88G05 | 39825.13  | 0  | 0    | 1  | 4.4  | 1  | 4.4  | 4   | 1   | 4.4  | 1    | 4.4  | 1    | 4.4  | 5    | 1   | 4.4  | 1    | 4.4  | 2    | 6.2  | 8    | 8                                                               | 8                                                                            | Cyclin-Y                                                             |
| CYFP2_MOUSE                                       | Q550X6 | 146801.38 | 4  | 3.4  | 6  | 4.5  | 5  | 3.4  | 54  | 5   | 4.6  | 8    | 5.3  | 8    | 5.6  | 52   | 5   | 3.4  | 6    | 4.5  | 7    | 4.2  | 49   | 49                                                              | Cytoplasmic FMR1-interacting protein 2                                       |                                                                      |
| GDAP1_MOUSE                                       | Q88741 | 147446.7  | 2  | 3.4  | 3  | 5.3  | 3  | 4.2  | 71  | 2   | 4.6  | 2    | 7.4  |      |      |      |     |      |      |      |      |      |      |                                                                 |                                                                              |                                                                      |



Supplementary table 1

|                                        |        | ACTIN/ARP |    |      |    |      |      |      |      |    |      |    |      |    |      |      |    |      |    |      |    |      |      |                      |                                   |                                                      |                                                          |
|----------------------------------------|--------|-----------|----|------|----|------|------|------|------|----|------|----|------|----|------|------|----|------|----|------|----|------|------|----------------------|-----------------------------------|------------------------------------------------------|----------------------------------------------------------|
| ACTB_RAT                               | P60711 | 42051.86  | 14 | 46.7 | 15 | 54.1 | 14   | 48.3 | 1212 | 18 | 62.9 | 18 | 63.5 | 18 | 65.6 | 1256 | 16 | 57.1 | 14 | 41.3 | 17 | 62.7 | 1177 | Actin, cytoplasmic 1 |                                   |                                                      |                                                          |
| ACTB_HUMAN                             | Q562R1 | 42318.1   | 5  | 13.6 | 4  | 12.8 | 5    | 13.6 | 378  | 4  | 12.8 | 5  | 20.7 | 4  | 12.8 | 368  | 4  | 12.8 | 4  | 12.8 | 4  | 12.8 | 4    | 12.8                 | 427                               | Beta-actin-like protein 2                            |                                                          |
| ARPC1_RAT                              | Q4V7C7 | 47797.15  | 2  | 6.7  | 4  | 13.9 | 4    | 11.7 | 23   | 2  | 6    | 3  | 8.9  | 2  | 6    | 14   | 4  | 11.5 | 3  | 9.3  | 3  | 8.9  | 3    | 8.9                  | 26                                | Actin-related protein 3                              |                                                          |
| ARPC3_MOUSE                            | Q01M76 | 20524.75  | 2  | 13.5 | 2  | 15.2 | 1    | 6.2  | 24   | 1  | 6.2  | 1  | 6.2  | 2  | 15.2 | 15   | 2  | 15.2 | 1  | 6.2  | 1  | 6.2  | 1    | 6.2                  | 18                                | Actin-related protein 2/3 complex subunit 3          |                                                          |
| ARPS1_RAT                              | A11108 | 16930.81  | 1  | 7.8  | 1  | 7.8  | 2    | 20.3 | 11   | 0  | 0    | 2  | 21.6 | 3  | 34   | 10   | 1  | 7.8  | 0  | 0    | 1  | 7.8  | 0    | 1                    | 7.8                               | 5                                                    | Actin-related protein 2/3 complex subunit 5-like protein |
| ARPC1A_RAT                             | Q99PD4 | 42169.9   | 1  | 2.7  | 1  | 2.7  | 2    | 5.9  | 6    | 1  | 2.7  | 2  | 7.3  | 2  | 7.3  | 7    | 1  | 2.7  | 1  | 2.7  | 2  | 7.3  | 0    | 0                    | 5                                 | Actin-related protein 2/3 complex subunit 1A         |                                                          |
| ARPC2_RAT                              | P85970 | 34441.52  | 1  | 4.7  | 1  | 4.7  | 1    | 3    | 4    | 0  | 0    | 2  | 7.7  | 1  | 4.7  | 5    | 1  | 4.7  | 1  | 4.7  | 0  | 0    | 0    | 0                    | 2                                 | Actin-related protein 2/3 complex subunit 2          |                                                          |
| TMOD2_RAT                              | P70566 | 39486.62  | 4  | 16.5 | 4  | 16.5 | 4    | 16.5 | 76   | 4  | 16.5 | 5  | 21.4 | 5  | 25.1 | 107  | 4  | 16.5 | 3  | 14.5 | 4  | 16.5 | 4    | 16.5                 | 93                                | Tropomodulin-2                                       |                                                          |
| ARPC4_MOUSE                            | P59999 | 19768.35  | 2  | 9.5  | 1  | 6.5  | 1    | 6.5  | 6    | 1  | 4.8  | 1  | 6.5  | 0  | 0    | 3    | 1  | 6.5  | 2  | 11.3 | 1  | 6.5  | 1    | 6.5                  | 8                                 | Actin-related protein 2/3 complex subunit 4          |                                                          |
| TUBULIN                                |        |           |    |      |    |      |      |      |      |    |      |    |      |    |      |      |    |      |    |      |    |      |      |                      |                                   |                                                      |                                                          |
| TBB2A_RAT                              | P85108 | 50255.17  | 24 | 66.5 | 25 | 67   | 27   | 67.2 | 2446 | 28 | 67.2 | 30 | 68.5 | 30 | 68.5 | 3419 | 26 | 67.2 | 23 | 62   | 28 | 67.9 | 28   | 67.9                 | 2382                              | Tubulin alpha-2A chain                               |                                                          |
| ACTININ                                |        |           |    |      |    |      |      |      |      |    |      |    |      |    |      |      |    |      |    |      |    |      |      |                      |                                   |                                                      |                                                          |
| ACTN1_RAT                              | Q9Z1P2 | 103465.79 | 6  | 8.5  | 6  | 9.3  | 7    | 10.8 | 53   | 5  | 7    | 5  | 8.9  | 5  | 8.2  | 50   | 4  | 5.8  | 5  | 6.8  | 5  | 7.7  | 5    | 7.7                  | 49                                | Alpha-actinin-1                                      |                                                          |
| ACTN4_RAT                              | Q9QXQ0 | 105318.66 | 2  | 2.6  | 5  | 7.4  | 2    | 2.4  | 32   | 3  | 3.7  | 2  | 3.3  | 1  | 1.3  | 35   | 2  | 2.6  | 3  | 3.7  | 2  | 2.6  | 2    | 2.6                  | 36                                | Alpha-actinin-4                                      |                                                          |
| ACTN2_HUMAN                            | P35609 | 104283.55 | 2  | 2.9  | 3  | 4.4  | 1    | 1.1  | 10   | 1  | 1.3  | 0  | 0    | 1  | 1.8  | 3    | 1  | 1.8  | 1  | 1.1  | 0  | 0    | 0    | 0                    | 3                                 | Alpha-actinin-2                                      |                                                          |
| SPECTRIN                               |        |           |    |      |    |      |      |      |      |    |      |    |      |    |      |      |    |      |    |      |    |      |      |                      |                                   |                                                      |                                                          |
| SPTA2_RAT                              | P16086 | 285260.57 | 48 | 22.7 | 76 | 40   | 71   | 37.7 | 1173 | 68 | 36.2 | 66 | 34.9 | 66 | 33.7 | 1151 | 58 | 30.1 | 60 | 31   | 77 | 39.7 | 39.7 | 1147                 | Spectrin alpha chain,             |                                                      |                                                          |
| SPTN2_RAT                              | Q9QWN8 | 272151.43 | 22 | 13.3 | 36 | 21.5 | 33   | 21.2 | 330  | 31 | 18.6 | 36 | 22.9 | 38 | 22.6 | 358  | 38 | 22.2 | 34 | 21.5 | 40 | 23.3 | 23.3 | 385                  | Spectrin beta chain               |                                                      |                                                          |
| SPTN4_HUMAN                            | Q9H254 | 290005.05 | 0  | 0    | 3  | 1.4  | 1    | 0.5  | 9    | 0  | 0    | 3  | 2.1  | 1  | 0.5  | 4    | 5  | 2.7  | 3  | 2.1  | 3  | 2.1  | 3    | 2.1                  | 13                                | Spectrin beta chain                                  |                                                          |
| SPTB2_MOUSE                            | Q62261 | 274907.77 | 43 | 22   | 59 | 31.4 | 63   | 33.9 | 1133 | 68 | 35   | 74 | 38.6 | 70 | 37   | 1237 | 57 | 32.1 | 48 | 27.4 | 54 | 31   | 31   | 31                   | 1113                              | Spectrin beta chain                                  |                                                          |
| MICROTUBULE ASSOCIATED PROTEINS (MAPs) |        |           |    |      |    |      |      |      |      |    |      |    |      |    |      |      |    |      |    |      |    |      |      |                      |                                   |                                                      |                                                          |
| MAP6_RAT                               | Q63560 | 100651.46 | 11 | 30.6 | 14 | 35.3 | 13   | 34.5 | 445  | 16 | 38.6 | 16 | 39.1 | 15 | 35.3 | 486  | 14 | 35.7 | 13 | 33   | 14 | 35.7 | 14   | 35.7                 | 424                               | Microtubule-associated protein 6                     |                                                          |
| MAP1B_RAT                              | P15205 | 270531.67 | 21 | 9.8  | 23 | 12.9 | 22   | 11.6 | 343  | 24 | 11.9 | 32 | 17.6 | 29 | 14.6 | 379  | 26 | 13.6 | 17 | 10   | 30 | 16.5 | 16.5 | 328                  | Microtubule-associated protein 1B |                                                      |                                                          |
| MAP1A_RAT                              | P34926 | 300830.91 | 10 | 5.4  | 13 | 6.7  | 15   | 7.7  | 172  | 13 | 7.5  | 23 | 12.3 | 14 | 8    | 176  | 15 | 8.7  | 10 | 5.6  | 17 | 9.6  | 9.6  | 170                  | Microtubule-associated protein 1A |                                                      |                                                          |
| MAP4_RAT                               | Q5M7W5 | 11046.22  | 4  | 5.7  | 3  | 4.3  | 3    | 4.3  | 82   | 4  | 5.7  | 4  | 5.7  | 4  | 5.7  | 109  | 4  | 5.7  | 3  | 4.3  | 4  | 5.7  | 7    | 5.7                  | 70                                | Microtubule-associated protein 4                     |                                                          |
| MAP2_RAT                               | P15146 | 202743.75 | 2  | 1.3  | 3  | 2.1  | 2    | 1.5  | 15   | 5  | 3.7  | 6  | 4.4  | 2  | 1.9  | 25   | 4  | 2.7  | 3  | 2.3  | 3  | 2.1  | 2.1  | 2.1                  | 16                                | Microtubule-associated protein 2                     |                                                          |
| MAP2F_HUMAN                            | Q9RUP3 | 623625.86 | 2  | 0.7  | 1  | 0.2  | 1    | 0.2  | 8    | 2  | 0.4  | 2  | 0.4  | 2  | 0.4  | 11   | 1  | 0.2  | 2  | 0.4  | 3  | 0.9  | 0.9  | 0.9                  | 12                                | Microtubule-actin cross-linking factor 1             |                                                          |
| MLP1A_RAT                              | Q53201 | 14320.41  | 0  | 0    | 0  | 1    | 10.7 | 1    | 10.7 | 2  | 0    | 0  | 10.7 | 1  | 11.6 | 2    | 2  | 22.3 | 2  | 22.3 | 1  | 10.7 | 10.7 | 10.7                 | 6                                 | Microtubule-associated proteins 1A/1B light chain 3A |                                                          |
| MAGD1_MOUSE                            | Q14889 | 20648.26  | 0  | 0    | 0  | 0    | 0    | 0    | 0    | 0  | 12   | 1  | 12   | 1  | 12   | 1    | 0  | 0    | 0  | 0    | 0  | 0    | 0    | 0                    | 0                                 | 0                                                    | MAP6 domain-containing protein 1                         |
| MAPF_MOUSE                             | Q9QXZ0 | 611249.19 | 2  | 0.5  | 3  | 0.7  | 3    | 0.7  | 18   | 4  | 0.9  | 5  | 1.5  | 5  | 1.3  | 32   | 3  | 0.7  | 1  | 0.2  | 4  | 1.2  | 1.2  | 1.2                  | 19                                | Microtubule-actin cross-linking factor 1             |                                                          |
| KIF5C_MOUSE                            | P28738 | 109997.37 | 3  | 4.1  | 5  | 7.7  | 3    | 4.7  | 23   | 5  | 7.8  | 4  | 6    | 5  | 7.8  | 27   | 4  | 6.7  | 3  | 4.7  | 3  | 4.9  | 4.9  | 4.9                  | 24                                | Kinesin heavy chain isoform 5C                       |                                                          |
| TAU_MOUSE                              | P10637 | 81107.97  | 2  | 3.6  | 5  | 9.8  | 5    | 12.1 | 86   | 7  | 13.9 | 7  | 13.9 | 6  | 12.2 | 111  | 5  | 12.1 | 3  | 6.1  | 5  | 12.1 | 12.1 | 12.1                 | 75                                | Microtubule-associated protein tau                   |                                                          |
| MARE3_RAT                              | Q5X1T1 | 32247.07  | 0  | 0    | 1  | 6    | 1    | 6    | 4    | 1  | 6    | 1  | 6    | 1  | 6    | 9    | 1  | 6    | 1  | 6    | 1  | 6    | 1    | 6                    | 7                                 | Microtubule-associated protein RP/EB family member 3 |                                                          |
| CATENINS                               |        |           |    |      |    |      |      |      |      |    |      |    |      |    |      |      |    |      |    |      |    |      |      |                      |                                   |                                                      |                                                          |
| CTND2_MOUSE                            | Q35927 | 135999.63 | 4  | 4.8  | 3  | 3.7  | 4    | 3.8  | 43   | 4  | 4.8  | 6  | 6.3  | 6  | 7.2  | 58   | 5  | 6.1  | 3  | 3.7  | 3  | 3.3  | 3.3  | 3.3                  | 37                                | Catenin delta-2                                      |                                                          |
| CTN81_RAT                              | Q9WU82 | 86083.46  | 6  | 8.8  | 8  | 12.2 | 9    | 14   | 91   | 6  | 8.8  | 9  | 15   | 10 | 17.7 | 81   | 7  | 11.9 | 7  | 13.4 | 6  | 8.2  | 8.2  | 8.2                  | 69                                | Catenin beta-1                                       |                                                          |
| CTNA2_MOUSE                            | Q61301 | 106045.13 | 4  | 4.7  | 9  | 13.5 | 10   | 18.3 | 52   | 9  | 15.5 | 9  | 12.9 | 9  | 14.6 | 46   | 7  | 12.3 | 7  | 10.6 | 5  | 8.1  | 8.1  | 8.1                  | 38                                | Catenin alpha-2                                      |                                                          |
| MYELIN                                 |        |           |    |      |    |      |      |      |      |    |      |    |      |    |      |      |    |      |    |      |    |      |      |                      |                                   |                                                      |                                                          |
| MBP_RAT                                | P02688 | 21545.99  | 7  | 37.9 | 5  | 31.8 | 6    | 32.8 | 180  | 6  | 32.8 | 6  | 32.8 | 7  | 37.9 | 223  | 7  | 37.9 | 6  | 32.8 | 6  | 32.8 | 6    | 32.8                 | 206                               | Myelin basic protein S                               |                                                          |
| MG3345_MOUSE                           | Q63345 | 28651.92  | 1  | 4.9  | 2  | 9.8  | 3    | 15   | 67   | 2  | 9.8  | 3  | 15   | 3  | 15   | 80   | 3  | 15   | 3  | 15   | 2  | 9.8  | 9.8  | 9.8                  | 90                                | Myelin-oligodendrocyte glycoprotein                  |                                                          |
| OMGP_MOUSE                             | Q63912 | 49708.2   | 3  | 7.3  | 5  | 12.3 | 4    | 9.8  | 63   | 3  | 7.3  | 3  | 7.3  | 3  | 7.3  | 43   | 3  | 7.3  | 5  | 12.3 | 4  | 9.8  | 9.8  | 9.8                  | 54                                | Oligodendrocyte-myelin glycoprotein                  |                                                          |
| CELL RECOGNITION MOLECULES             |        |           |    |      |    |      |      |      |      |    |      |    |      |    |      |      |    |      |    |      |    |      |      |                      |                                   |                                                      |                                                          |
| NPTN_RAT                               | P97546 | 31499.94  | 0  | 0    | 1  | 6.4  | 1    | 6.4  | 5    | 1  | 6.4  | 1  | 6.4  | 1  | 6.4  | 5    | 1  | 6.4  | 0  | 0    | 1  | 6.4  | 6.4  | 6.4                  | 3                                 | Neuropilin                                           |                                                          |
| NFASC_RAT                              | P97685 | 138716.53 | 7  | 7.8  | 11 | 13.2 | 7    | 8.3  | 73   | 7  | 8.2  | 11 | 13.1 | 9  | 9.9  | 85   | 10 | 12.3 | 10 | 12.3 | 10 | 12.3 | 12.3 | 12.3                 | 102                               | Neurofascin                                          |                                                          |
| TENR_RAT                               | Q05546 | 151614.38 | 0  | 0    | 0  | 1    | 1    | 1    | 1    | 1  | 0.8  | 1  | 1.3  | 1  | 0.8  | 3    | 2  | 1.8  | 0  | 0    | 1  | 0.8  | 0.8  | 0.8                  | 3                                 | Tenascin-R                                           |                                                          |
| KERATINS                               |        |           |    |      |    |      |      |      |      |    |      |    |      |    |      |      |    |      |    |      |    |      |      |                      |                                   |                                                      |                                                          |
| K1C9_HUMAN                             | P35527 | 62320     | 3  | 5.6  | 1  | 1.4  | 6    | 12   | 38   | 8  | 18.8 | 8  | 18.8 | 7  | 19.4 | 55   | 5  | 11.4 | 3  | 5.6  | 6  | 14.4 | 14.4 | 14.4                 | 36                                | Keratin, type I cytoskeletal 9                       |                                                          |
| K2C5_HUMAN                             | P13647 | 62568.06  | 1  | 2    | 1  | 2    | 1    | 2    | 33   | 2  | 3.9  | 1  | 2    | 1  | 2    | 42   | 1  | 2    | 2  | 3.6  | 1  | 2    | 2    | 2                    | 31                                | Keratin, type II cytoskeletal 5                      |                                                          |
| K1C10_HUMAN                            | P13645 | 59702.90  | 2  | 4.2  | 4  | 7.3  | 4    | 7.6  | 52   | 7  | 14   | 5  | 10.5 | 4  | 8.3  | 56   | 3  | 5.1  | 2  | 5.2  | 5  | 10.8 | 10.8 | 10.8                 | 37                                | Keratin, type I cytoskeletal 10                      |                                                          |
| OTHER CYTOSKELETAL PROTEINS            |        |           |    |      |    |      |      |      |      |    |      |    |      |    |      |      |    |      |    |      |    |      |      |                      |                                   |                                                      |                                                          |
| ABLIM1_MOUSE                           | Q8K4G5 | 89512.79  | 1  | 2.1  | 2  | 3.6  | 3    | 5.4  | 17   | 2  | 3.6  | 2  | 3.6  | 3  | 5.4  | 26   | 2  | 3.6  | 1  | 1.5  | 2  | 3.6  | 3.6  | 3.6                  | 24                                | Actin-binding LIM protein 1                          |                                                          |
| ABI1_RAT                               | Q9QZM5 | 55160.76  | 0  | 0    | 2  | 7.1  | 3    | 10.6 | 14   | 4  | 12.8 | 4  | 13.4 | 3  | 9.3  | 20   | 4  | 13.8 | 3  | 10.6 | 2  | 7.1  | 7.1  | 7.1                  | 20                                | Abi1 interactor 1                                    |                                                          |
| BRK1_MOUSE                             | Q9JVR8 | 8812.48   | 0  | 0    | 1  | 17.3 | 1    | 17.3 | 3    | 0  | 0    | 1  | 17.3 | 1  | 17.3 | 2    | 1  | 17.3 | 1  | 17.3 | 1  | 17.3 | 17.3 | 17.3                 | 4                                 | Probable protein BRICK1                              |                                                          |
| ANX_MOUSE                              | P46660 | 55879.46  | 13 | 28.4 | 15 | 28.4 | 15   | 27.4 | 281  | 20 | 37.5 | 17 | 29.6 | 14 | 26.2 | 359  | 16 | 28.2 | 14 | 31   | 17 | 29.6 | 29.6 | 29.6                 | 298                               | Alpha-internexin                                     |                                                          |
| ABI2_MOUSE                             | P62484 | 49413.5   | 1  | 3.8  | 0  | 0    | 2    | 7.4  | 5    | 2  | 7.4  | 3  | 11.4 | 1  | 3.6  | 12   | 2  | 7.4  | 0  | 0    | 1  | 3.6  | 3.6  | 3.6                  | 6                                 | Abi1 interactor 2                                    |                                                          |
| ABLIM2_RAT                             | Q6KC51 | 69773.8   | 1  | 2.3  | 2  | 4.6  | 2    | 4.9  | 8    | 2  | 4.9  | 2  | 4.9  | 3  | 4.7  | 14   | 2  | 4.9  | 1  | 2    | 2  | 4.9  | 4.9  | 4.9                  | 7                                 | Actin-binding LIM protein 2                          |                                                          |
| ACT2_RAT                               | P85515 | 42700.95  | 1  | 2.1  | 0  | 0    | 1    | 4.3  | 4    | 2  | 9    | 2  | 10.1 | 1  | 8.3  | 17   | 1  | 4.3  | 1  | 4.3  | 0  | 0    | 0    | 0                    | 4                                 | Alpha-centractin                                     |                                                          |
| ADDA_RAT                               | Q63028 | 80704.43  | 3  | 5.4  | 5  | 10.7 | 4    | 6.9  | 32   | 7  | 16.7 | 8  | 18.9 | 4  | 8.8  | 58   | 4  | 9.4  | 6  | 12.1 | 5  | 10.7 | 10.7 | 10.7                 | 42                                | Alpha-adducin                                        |                                                          |
| ADDB_RAT                               | Q50764 | 81259.6   | 3  | 3.9  | 5  | 7.7  | 2    | 2.5  | 28   | 3  | 4.3  | 3  |      |    |      |      |    |      |    |      |    |      |      |                      |                                   |                                                      |                                                          |

Supplementary table 1

|                                            |        |           |    |      |    |      |     |      |      |      |      |      |      |      |      |      |      |      |     |      |    |      |                          |                                                                          |             |
|--------------------------------------------|--------|-----------|----|------|----|------|-----|------|------|------|------|------|------|------|------|------|------|------|-----|------|----|------|--------------------------|--------------------------------------------------------------------------|-------------|
| LIPAZ_MOUSE                                | Q8859  | 143566.69 | 2  | 2    | 4  | 3.8  | 2   | 1.8  | 15   | 3    | 2.9  | 2    | 1.8  | 2    | 1.6  | 20   | 1    | 1    | 0   | 0    | 2  | 2.1  | 8                        | Liprin-alpha-2                                                           |             |
| PROF2_RAT                                  | Q9EPC6 | 15364.38  | 2  | 15.7 | 1  | 10   | 1   | 10   | 34   | 1    | 10   | 2    | 15.7 | 1    | 10   | 35   | 2    | 15.7 | 1   | 0    | 2  | 1.1  | 21                       | Profilin-2                                                               |             |
| SYNP2_MOUSE                                | Q92327 | 100380.61 | 1  | 1.9  | 3  | 6.7  | 2   | 4.9  | 7    | 2    | 4.2  | 1    | 2.3  | 1    | 2.3  | 7    | 3    | 6.9  | 3   | 5.9  | 2  | 4.1  | 12                       | Synaptotagmin-2                                                          |             |
| THY1_RAT                                   | P01830 | 18386.76  | 6  | 31.7 | 6  | 31.7 | 6   | 31.7 | 194  | 5    | 25.5 | 7    | 32.3 | 7    | 32.3 | 233  | 6    | 31.7 | 6   | 31.7 | 7  | 32.3 | 195                      | Thy-1 membrane glycoprotein                                              |             |
| TAGL3_RAT                                  | P37805 | 22641.24  | 3  | 21.6 | 7  | 48.7 | 7   | 45.2 | 72   | 2    | 18.1 | 8    | 52.3 | 5    | 30.2 | 48   | 6    | 35.2 | 8   | 53.3 | 7  | 45.2 | 91                       | Transgelin-3                                                             |             |
| WASF1_RAT                                  | Q581U7 | 61755.88  | 4  | 8.8  | 4  | 8.8  | 5   | 11.1 | 34   | 4    | 7.7  | 5    | 11.1 | 5    | 12   | 27   | 6    | 13.4 | 2   | 5    | 5  | 11.1 | 36                       | Wiskott-Aldrich syndrome protein family member 1                         |             |
| WASF3_MOUSE                                | Q8VH16 | 55372.69  | 0  | 0    | 0  | 0    | 1   | 2.6  | 1    | 0    | 0    | 2    | 6.6  | 1    | 2.6  | 8    | 1    | 2.6  | 1   | 2.6  | 0  | 0    | 2                        | Wiskott-Aldrich syndrome protein family member 3                         |             |
| <b>OTHER CELL ADHESION MOLECULES</b>       |        |           |    |      |    |      |     |      |      |      |      |      |      |      |      |      |      |      |     |      |    |      |                          |                                                                          |             |
| ASTN1_MOUSE                                | Q61137 | 147628.81 | 1  | 0.8  | 1  | 1.4  | 1   | 1.8  | 4    | 1    | 1.4  | 3    | 4.3  | 3    | 4.4  | 11   | 0    | 0    | 2   | 2.2  | 3  | 4    | 6                        | Astroctactin-1                                                           |             |
| CNTN1_RAT                                  | P97846 | 157764.53 | 14 | 13.1 | 19 | 18   | 15  | 14   | 229  | 14   | 19   | 16   | 14.7 | 16   | 15.8 | 199  | 13   | 12.2 | 21  | 20.3 | 18 | 15.8 | 255                      | Contactin-associated protein 1                                           |             |
| CAD13_MOUSE                                | Q9WTR5 | 78546.86  | 2  | 5.2  | 1  | 2    | 1   | 2    | 1    | 2    | 5.2  | 2    | 5.2  | 2    | 5.2  | 18   | 2    | 5.2  | 1   | 2    | 1  | 3.2  | 9                        | Cadherin-13                                                              |             |
| NCAM_RAT                                   | P55067 | 137398.7  | 5  | 4.2  | 4  | 3.6  | 4   | 3.6  | 78   | 3    | 2.5  | 3    | 2.5  | 4    | 3.6  | 57   | 4    | 3.6  | 3   | 2.5  | 4  | 3.6  | 89                       | Neurocan core protein                                                    |             |
| CNTN1_RAT                                  | Q63198 | 114278.38 | 24 | 26.8 | 27 | 36.3 | 29  | 38.9 | 845  | 25   | 34.4 | 28   | 38.3 | 29   | 43.4 | 730  | 26   | 36.8 | 27  | 34   | 29 | 40.2 | 849                      | Contactin-1                                                              |             |
| HPLN1_RAT                                  | P03994 | 41079.4   | 4  | 9.8  | 6  | 17.4 | 5   | 14.9 | 53   | 3    | 8.7  | 3    | 8.7  | 3    | 8.7  | 31   | 3    | 8.7  | 6   | 15.7 | 3  | 8.4  | 43                       | Hyaluronan and proteoglycan link protein 1                               |             |
| HPLN4_MOUSE                                | Q80W44 | 42808.69  | 1  | 2.2  | 1  | 2.2  | 1   | 2.2  | 24   | 1    | 2.2  | 2    | 2.2  | 1    | 2.2  | 15   | 1    | 2.2  | 1   | 2.2  | 1  | 2.2  | 23                       | Hyaluronan and proteoglycan link protein 4                               |             |
| NERF1_RAT                                  | Q82008 | 39378.52  | 1  | 3.7  | 1  | 3.7  | 1   | 3.7  | 47   | 1    | 3.7  | 1    | 3.7  | 1    | 3.7  | 32   | 1    | 3.7  | 1   | 3.7  | 1  | 3.7  | 35                       | Neuronal growth regulator 1                                              |             |
| CD47_RAT                                   | P97829 | 33486.98  | 1  | 2.6  | 1  | 2.6  | 2   | 2.6  | 25   | 1    | 2.6  | 1    | 2.6  | 1    | 2.6  | 10   | 2    | 2.6  | 2   | 2.6  | 1  | 2.6  | 15                       | Leukocyte surface antigen CD47                                           |             |
| LG11_RAT                                   | Q93845 | 64428.71  | 4  | 6.8  | 6  | 13.1 | 4   | 9.9  | 43   | 8    | 15.6 | 7    | 15.4 | 5    | 13.6 | 53   | 7    | 15.3 | 7   | 14.5 | 6  | 12.4 | 51                       | Leucine-rich glioma-inactivated protein 1                                |             |
| LRRC7_RAT                                  | P70587 | 168050.32 | 6  | 6.6  | 9  | 8.9  | 11  | 11.3 | 79   | 7    | 7.1  | 10   | 10.8 | 10   | 10.3 | 52   | 11   | 11.4 | 9   | 9.4  | 9  | 9.5  | 75                       | Leucine-rich repeat-containing protein 7                                 |             |
| LRFN6_MOUSE                                | Q68FM6 | 91055.78  | 2  | 3    | 3  | 6.3  | 4   | 7.4  | 18   | 3    | 5.3  | 2    | 4.3  | 3    | 6.3  | 15   | 3    | 6.3  | 2   | 3    | 3  | 6.3  | 11                       | Leucine-rich repeat and fibronectin type-III domain-containing protein 6 |             |
| LSAMP_RAT                                  | Q62813 | 37883.4   | 2  | 8.6  | 5  | 21   | 3   | 15.4 | 87   | 4    | 19.5 | 5    | 21   | 4    | 15.4 | 92   | 3    | 15.4 | 4   | 15.4 | 6  | 25.1 | 100                      | Limbic system-associated membrane protein                                |             |
| LC59_RAT                                   | Q5RJR8 | 35311.94  | 1  | 5.9  | 0  | 0    | 3   | 13   | 6    | 3    | 13   | 6    | 16.9 | 3    | 13   | 22   | 2    | 8.1  | 1   | 4.2  | 2  | 8.1  | 4                        | Leucine-rich repeat-containing protein 59                                |             |
| BP2EA_HUMAN                                | Q94833 | 593702.6  | 0  | 1    | 0  | 1    | 0.2 | 0.4  | 6    | 2    | 0.4  | 2    | 0.4  | 2    | 0.4  | 15   | 1    | 0.2  | 1   | 0.2  | 1  | 0.2  | 11                       | Bullous pemphigoid antigen 1                                             |             |
| LICAM_RAT                                  | Q05695 | 141815.76 | 0  | 0    | 2  | 1.8  | 1   | 1    | 4    | 0    | 0    | 3    | 4.6  | 0    | 0    | 3    | 1    | 1.6  | 0   | 0    | 1  | 1.6  | 2                        | Neural cell adhesion molecule L1                                         |             |
| NTRI_MOUSE                                 | Q99PJ0 | 38530.68  | 1  | 6.1  | 3  | 10.5 | 4   | 15.7 | 33   | 3    | 10.5 | 5    | 15.7 | 4    | 15.1 | 39   | 4    | 15.1 | 2   | 6.1  | 5  | 15.7 | 47                       | Neurotrimin                                                              |             |
| ICAM5_MOUSE                                | Q60625 | 98510.23  | 4  | 5.5  | 2  | 2.8  | 2   | 2.8  | 15   | 1    | 1.9  | 3    | 4.1  | 2    | 3.2  | 14   | 2    | 2.8  | 1   | 1.9  | 1  | 1    | 7                        | Intercellular adhesion molecule 5                                        |             |
| CADH2_RAT                                  | Q921Y3 | 100080.51 | 2  | 3    | 3  | 7.3  | 2   | 4.4  | 20   | 2    | 4.4  | 3    | 7.3  | 3    | 7.3  | 26   | 3    | 7.3  | 2   | 4.9  | 3  | 6.1  | 23                       | Cadherin-2                                                               |             |
| NCAM1_RAT                                  | P13596 | 120151.75 | 4  | 5.2  | 4  | 5.8  | 5   | 6.8  | 47   | 5    | 6.8  | 6    | 7.9  | 5    | 6.9  | 52   | 5    | 6.8  | 5   | 6.8  | 4  | 5.8  | 46                       | Neural cell adhesion molecule 1                                          |             |
| NLGN2_RAT                                  | Q62888 | 91502.17  | 1  | 1.9  | 1  | 1.9  | 2   | 4.3  | 9    | 1    | 1.9  | 1    | 2.4  | 1    | 2.4  | 5    | 1    | 1.9  | 1   | 1.8  | 1  | 1.9  | 8                        | Neurigin-2                                                               |             |
| NRX1A_RAT                                  | Q63372 | 170170.05 | 0  | 0    | 1  | 1.2  | 1   | 1.2  | 5    | 0    | 0    | 1    | 1.2  | 1    | 1.2  | 4    | 1    | 1.2  | 0   | 0    | 1  | 1.2  | 4                        | Neurexin-1-alpha                                                         |             |
| OPCM_RAT                                   | P32736 | 38403.44  | 1  | 3.2  | 1  | 3.2  | 2   | 8.7  | 16   | 2    | 9.3  | 3    | 14.5 | 3    | 13.9 | 23   | 2    | 9.3  | 1   | 3.2  | 2  | 7.8  | 14                       | Opioid-binding protein/cell adhesion molecule                            |             |
| <b>SYNAPTIC VESICLES/PROTEIN TRANSPORT</b> |        |           |    |      |    |      |     |      |      |      |      |      |      |      |      |      |      |      |     |      |    |      |                          |                                                                          |             |
| <b>CLATHRIN</b>                            |        |           |    |      |    |      |     |      |      |      |      |      |      |      |      |      |      |      |     |      |    |      |                          |                                                                          |             |
| CLH_RAT                                    | P11442 | 193234.17 | 5  | 3.3  | 8  | 6.3  | 10  | 8.2  | 66   | 6    | 4.9  | 9    | 7.5  | 7    | 5.7  | 51   | 11   | 9.2  | 14  | 10.4 | 12 | 9.7  | 82                       | Clathrin heavy chain 1                                                   |             |
| <b>SYNAPTIC VESICLES</b>                   |        |           |    |      |    |      |     |      |      |      |      |      |      |      |      |      |      |      |     |      |    |      |                          |                                                                          |             |
| AP180_RAT                                  | Q05140 | 92672.11  | 0  | 0    | 1  | 1.3  | 1   | 1.3  | 9    | 1    | 1.3  | 1    | 1.3  | 1    | 1.3  | 10   | 1    | 1.3  | 1   | 1.3  | 2  | 2.2  | 10                       | Clathrin coat assembly protein                                           |             |
| AP21_RAT                                   | Q92327 | 100380.61 | 1  | 1.9  | 3  | 6.7  | 2   | 4.9  | 7    | 2    | 4.2  | 1    | 2.3  | 1    | 2.3  | 7    | 3    | 6.9  | 3   | 5.9  | 2  | 4.1  | 12                       | AP-2 complex subunit                                                     |             |
| AP2M1_RAT                                  | P84092 | 40965.15  | 5  | 12.4 | 7  | 17.7 | 7   | 20.2 | 64   | 8    | 21.1 | 8    | 21.1 | 9    | 27.6 | 73   | 8    | 21.4 | 5   | 15.4 | 7  | 17.5 | 66                       | AP-2 complex subunit mu-1                                                |             |
| AP2A2_RAT                                  | P18484 | 104891.43 | 10 | 12.3 | 13 | 19.2 | 12  | 16.3 | 146  | 14   | 19.6 | 18   | 27.7 | 13   | 17.9 | 132  | 11   | 15.4 | 13  | 17.7 | 16 | 21.5 | 159                      | AP-2 complex subunit alpha-2                                             |             |
| AP2A1_MOUSE                                | P17426 | 108679.34 | 10 | 13.3 | 11 | 15.1 | 9   | 12.7 | 124  | 9    | 13.1 | 11   | 16   | 7    | 11   | 111  | 11   | 15.1 | 13  | 17.2 | 9  | 13   | 119                      | AP-2 complex subunit alpha-1                                             |             |
| AP2B1_RAT                                  | P62944 | 106550.96 | 6  | 6.6  | 7  | 9.8  | 10  | 13.4 | 72   | 8    | 10.8 | 11   | 18.1 | 8    | 11.0 | 77   | 8    | 11.5 | 8   | 11.8 | 8  | 9.9  | 82                       | AP-1 complex subunit beta-1                                              |             |
| NSF_RAT                                    | Q9Q1L6 | 83131.17  | 15 | 25.3 | 13 | 23   | 14  | 24.1 | 233  | 17   | 30.6 | 20   | 30.8 | 17   | 26.3 | 300  | 12   | 23   | 14  | 23.7 | 10 | 17.2 | 158                      | Vesicle-fusing ATPase                                                    |             |
| RIMS1_RAT                                  | Q9JIR4 | 180798.74 | 2  | 1.7  | 8  | 7.6  | 7   | 5.4  | 33   | 5    | 3.9  | 7    | 4.1  | 8    | 3    | 36   | 8    | 6.9  | 8   | 7.1  | 6  | 4.9  | 36                       | Regulating synaptic membrane exocytosis protein 1                        |             |
| RIMS2_RAT                                  | Q98339 | 64658.33  | 2  | 6.3  | 2  | 6.3  | 2   | 6.3  | 12   | 2    | 6.3  | 2    | 6.3  | 2    | 6.3  | 14   | 3    | 9.7  | 2   | 6.3  | 2  | 6.3  | 13                       | Myc box-dependent interacting protein 1                                  |             |
| RIMS2_MOUSE                                | Q9JIR1 | 116283.45 | 1  | 1.5  | 4  | 6.5  | 2   | 3.1  | 12   | 2    | 2.6  | 2    | 4.4  | 3    | 5.9  | 9    | 4    | 6.4  | 3   | 4.8  | 4  | 6.9  | 22                       | RIMS-binding protein 2                                                   |             |
| RIMS2_RAT                                  | Q9JIS1 | 161215.72 | 0  | 0    | 2  | 2.1  | 0   | 0    | 2    | 1    | 0.9  | 0    | 0    | 1    | 2.1  | 2    | 1    | 0.9  | 1   | 0.9  | 1  | 0.9  | 5                        | Regulating synaptic membrane exocytosis protein 2                        |             |
| RP3A_RAT                                   | P47709 | 76640.06  | 2  | 4.5  | 3  | 7.6  | 3   | 7.6  | 22   | 3    | 7.6  | 3    | 7.6  | 3    | 7.6  | 16   | 3    | 7.6  | 4   | 12.4 | 3  | 7.6  | 21                       | Rabphilin-3A                                                             |             |
| SNP25_RAT                                  | P60881 | 23528.29  | 3  | 21.8 | 2  | 14.6 | 2   | 14.6 | 45   | 2    | 14.6 | 2    | 14.6 | 3    | 21.4 | 31   | 4    | 29.6 | 4   | 34   | 4  | 28.6 | 35                       | Synaptosomal-associated protein 25                                       |             |
| CRPL1_RAT                                  | P63041 | 15169.48  | 1  | 14.9 | 1  | 14.9 | 1   | 14.9 | 1    | 14.9 | 1    | 14.9 | 1    | 14.9 | 0    | 0    | 2    | 32.8 | 0   | 0    | 1  | 14.9 | 4                        | Complexin-1                                                              |             |
| CRF2_RAT                                   | P94087 | 15498.72  | 0  | 0    | 1  | 11.2 | 1   | 17.9 | 4    | 1    | 17.9 | 2    | 29.1 | 1    | 17.9 | 2    | 29.1 | 0    | 0   | 0    | 0  | 0    | 0                        | 2                                                                        | Complexin-2 |
| SNIP_RAT                                   | Q9QXY2 | 130006.77 | 18 | 24.2 | 23 | 32.2 | 25  | 33.9 | 335  | 22   | 29.2 | 28   | 39.3 | 29   | 39.3 | 341  | 23   | 32.1 | 22  | 29.5 | 23 | 32.6 | 325                      | p130Cas-associated protein                                               |             |
| STX18_RAT                                  | P61265 | 33481.93  | 1  | 4.9  | 3  | 13.2 | 1   | 4.9  | 45   | 2    | 10.1 | 3    | 14.2 | 2    | 10.1 | 37   | 2    | 10.1 | 3   | 13.2 | 2  | 10.1 | 45                       | Syntaxin-1                                                               |             |
| STX18_MOUSE                                | P61765 | 67925.01  | 4  | 6.4  | 2  | 4.4  | 5   | 10.4 | 25   | 3    | 7.4  | 5    | 10.8 | 4    | 8.8  | 24   | 3    | 7.4  | 3   | 6.1  | 4  | 10.3 | 28                       | Syntaxin-binding protein 1                                               |             |
| SYN1_RAT                                   | P09951 | 74113.66  | 21 | 48.7 | 22 | 48.3 | 23  | 52.7 | 1094 | 23   | 49.1 | 23   | 52.7 | 22   | 48.3 | 1085 | 23   | 48.9 | 19  | 46.4 | 20 | 46.6 | 949                      | Synapsin-1                                                               |             |
| SYN2_RAT                                   | Q63537 | 63701.88  | 12 | 31.1 | 14 | 36   | 15  | 37.2 | 540  | 14   | 36   | 14   | 36   | 14   | 36   | 533  | 13   | 33.8 | 13  | 33.6 | 15 | 37.2 | 496                      | Synapsin-2                                                               |             |
| SYN3_RAT                                   | Q70441 | 63536.95  | 2  | 5    | 2  | 5    | 2   | 5    | 50   | 2    | 5    | 3    | 9    | 3    | 9    | 48   | 2    | 5    | 2   | 5    | 2  | 5    | 43                       | Synapsin-3                                                               |             |
| SYTL_RAT                                   | P21707 | 47934.95  | 3  | 8.3  | 2  | 5.9  | 2   | 6.4  | 20   | 3    | 8.3  | 5    | 13.7 | 4    | 11.6 | 38   | 2    | 5.9  | 4   | 13.7 | 2  | 5.9  | 24                       | Synaptotagmin-1                                                          |             |
| STML2_RAT                                  | Q4FZ70 | 38475.26  | 0  | 0    | 1  | 4.2  | 1   | 4.2  | 8    | 1    | 4.2  | 1    | 4.2  | 1    | 4.2  | 7    | 1    | 4.2  | 1   | 4.2  | 1  | 4.2  | 14                       | Stomatatin-like protein 2                                                |             |
| SYNJ1_RAT                                  | Q62910 | 173970.02 | 3  | 4.6  | 2  | 2.7  | 2   | 2.7  | 12   | 3    | 4.7  | 3    | 4.4  | 4    | 4.4  | 18   | 3    | 4.4  | 1   | 0.8  | 1  | 1.8  | 8                        | Synaptotagmin-1                                                          |             |
| SYT7_HUMAN                                 | O43581 | 45814.75  | 1  | 4.5  | 0  | 0    | 1   | 4.5  | 3    | 2    | 7.7  | 1    | 4.5  | 1    | 4.5  | 4    | 0    | 0    | 1   | 2.7  | 2  | 10.4 | 3                        | Synaptotagmin-7                                                          |             |
| VAMP2_RAT                                  | P63045 | 12697.69  | 0  | 0    | 1  | 20.7 | 1   | 20.7 | 2    | 0    | 0    | 0    | 0    | 1    | 20.7 | 1    | 1    | 20.7 | 0   | 0    | 1  | 20.7 | 3                        | Vesicle-associated membrane protein 2                                    |             |
| ZDL1_MOUSE                                 | Q93447 | 197828.88 | 1  | 0.5  | 1  | 0.5  | 2   | 1.5  | 9    | 4    | 1    | 1.1  | 2    | 1.5  | 1    | 1    | 7    | 1    | 0.5 | 0    | 0  | 1.1  | 2                        | Tight junction protein 1                                                 |             |
| PAK31_RAT                                  | Q88588 | 105034.47 | 2  | 4.8  | 1  | 2.7  | 1   | 2.7  | 44   | 1    | 2.7  | 1    | 2.7  | 1    | 2.7  | 47   | 1    | 2.7  | 1   | 2.7  | 1  | 2.7  | 44                       | Phosphotyrosine acidic cluster sorting protein 1                         |             |
| UN13A_MOUSE                                | Q4KU52 | 2         | 2  | 3    | 3  | 3    | 3   | 22   | 3    | 2    | 3    | 2    | 3    | 3    | 13   | 3    | 1    | 3    | 1   | 2    | 2  | 15   | Protein unc-13 homolog A |                                                                          |             |
| UN13A_RAT                                  | Q62768 | 198342    | 2  | 2    | 4  | 3.8  | 3   | 3.1  | 1.4  | 3    | 3.1  | 1    | 4    | 3.8  | 11   | 4    | 3.8  | 1    | 0.7 | 2    | 2  | 11   | Protein                  |                                                                          |             |





Supplementary Table2

| Protein Name | Uniprot accession numbers | Lithium 1 (Sum Intensity) | Lithium 2 (Sum Intensity) | Lithium 3 (Sum Intensity) | Average Total intensity (Lithium) | Control 1 (Sum Intensity) | Control 2 (Sum Intensity) | Control 3 (Sum Intensity) | Average Total Intensity (Control) | Log2 fold change Lithium/ Control | Effect size Lithium/ Control | t-test Lithium / control | p-value Lithium / control |
|--------------|---------------------------|---------------------------|---------------------------|---------------------------|-----------------------------------|---------------------------|---------------------------|---------------------------|-----------------------------------|-----------------------------------|------------------------------|--------------------------|---------------------------|
| QCR1_RAT     | Q68FY0                    | 1.28E+08                  | 1.31E+08                  | 1.02E+08                  | 1.21E+08                          | 5.93E+07                  | 8.16E+07                  | 6.58E+07                  | 6.89E+07                          | 0.8                               | 1.67                         | 0.01                     | 0.99                      |
| HBA_RAT      | P01946                    | 9.02E+05                  | 1.19E+05                  | 7.18E+05                  | 5.80E+05                          | 3.19E+06                  | 1.78E+06                  | 2.41E+06                  | 2.46E+06                          | -2.1                              | -1.63                        | 0.02                     | 0.99                      |
| MPCP_MOUSE   | Q8VEM8                    | 1.93E+07                  | 2.94E+07                  | 2.20E+07                  | 2.36E+07                          | 3.67E+07                  | 3.44E+07                  | 3.41E+07                  | 3.51E+07                          | -0.6                              | -1.61                        | 0.02                     | 0.98                      |
| PP2BA_RAT    | P63329                    | 9.60E+07                  | 6.67E+07                  | 6.23E+07                  | 7.50E+07                          | 1.28E+08                  | 1.08E+08                  | 1.36E+08                  | 1.24E+08                          | -0.7                              | -1.60                        | 0.02                     | 0.98                      |
| TPIS_RAT     | P48500                    | 3.18E+07                  | 1.73E+08                  | 1.20E+08                  | 1.08E+08                          | 2.44E+08                  | 2.91E+08                  | 3.53E+08                  | 2.96E+08                          | -1.5                              | -1.60                        | 0.02                     | 0.98                      |
| VAOD1_MOUSE  | P51863                    | 4.93E+08                  | 6.42E+08                  | 3.69E+08                  | 5.01E+08                          | 2.38E+08                  | 1.13E+08                  | 2.22E+08                  | 1.91E+08                          | 1.4                               | 1.59                         | 0.02                     | 0.98                      |
| DYHC1_RAT    | P38650                    | 1.14E+08                  | 1.18E+08                  | 8.59E+07                  | 1.06E+08                          | 4.45E+07                  | 8.00E+07                  | 2.82E+07                  | 5.09E+07                          | 1.1                               | 1.52                         | 0.04                     | 0.97                      |
| IGSF8_MOUSE  | Q8R366                    | 5.34E+06                  | 1.24E+07                  | 1.19E+07                  | 9.88E+06                          | 2.89E+05                  | 7.92E+05                  | 4.71E+06                  | 1.93E+06                          | 2.4                               | 1.52                         | 0.04                     | 0.97                      |
| CCG8_RAT     | Q8VHW5                    | 6.06E+06                  | 3.65E+06                  | 6.92E+06                  | 5.54E+06                          | 1.16E+07                  | 1.38E+07                  | 2.31E+07                  | 1.61E+07                          | -1.5                              | -1.50                        | 0.04                     | 0.97                      |
| PRRT1_RAT    | Q6MG82                    | 2.07E+07                  | 1.88E+07                  | 1.63E+07                  | 1.86E+07                          | 2.73E+07                  | 2.58E+07                  | 3.86E+07                  | 3.05E+07                          | -0.7                              | -1.49                        | 0.05                     | 0.96                      |
| PDE2A_RAT    | Q01062                    | 1.31E+08                  | 2.17E+08                  | 1.13E+08                  | 1.54E+08                          | 6.34E+06                  | 8.74E+07                  | 3.73E+07                  | 4.37E+07                          | 1.8                               | 1.48                         | 0.05                     | 0.96                      |
| ANS1B_RAT    | POC6S7                    | 1.95E+08                  | 1.74E+08                  | 1.02E+08                  | 1.57E+08                          | 2.98E+08                  | 2.06E+08                  | 2.61E+08                  | 2.55E+08                          | -0.7                              | -1.43                        | 0.06                     | 0.95                      |
| E41L3_MOUSE  | Q9WV92                    | 1.80E+07                  | 2.64E+07                  | 8.96E+06                  | 1.78E+07                          | 3.34E+06                  | 3.17E+06                  | 7.50E+06                  | 4.67E+06                          | 1.9                               | 1.43                         | 0.07                     | 0.95                      |
| ANK3_HUMAN   | Q12955                    | 1.88E+08                  | 1.29E+08                  | 1.67E+08                  | 1.61E+08                          | 4.90E+07                  | 1.26E+08                  | 1.07E+08                  | 9.40E+07                          | 0.8                               | 1.39                         | 0.08                     | 0.94                      |
| CAMKV_RAT    | Q63092                    | 1.11E+07                  | 1.30E+07                  | 1.54E+07                  | 1.31E+07                          | 2.44E+07                  | 1.55E+07                  | 2.98E+07                  | 2.32E+07                          | -0.8                              | -1.38                        | 0.08                     | 0.94                      |
| GRM3_RAT     | P31422                    | 1.67E+07                  | 9.34E+06                  | 1.53E+07                  | 1.38E+07                          | 3.35E+06                  | 9.50E+06                  | 8.53E+06                  | 7.13E+06                          | 1.0                               | 1.36                         | 0.09                     | 0.93                      |
| RGRF1_RAT    | P28818                    | 1.85E+05                  | 7.91E+05                  | 8.19E+05                  | 5.98E+05                          | 1.92E+06                  | 1.85E+06                  | 8.00E+05                  | 1.52E+06                          | -1.3                              | -1.36                        | 0.09                     | 0.93                      |
| 1433E_RAT    | P62260                    | 2.45E+08                  | 2.49E+08                  | 7.76E+07                  | 1.91E+08                          | 2.80E+07                  | 8.30E+07                  | 6.94E+07                  | 6.01E+07                          | 1.7                               | 1.36                         | 0.09                     | 0.93                      |
| 1433T_RAT    | P68255                    | 2.24E+08                  | 2.41E+08                  | 5.14E+07                  | 1.72E+08                          | 1.89E+07                  | 4.54E+07                  | 5.89E+07                  | 4.11E+07                          | 2.1                               | 1.33                         | 0.10                     | 0.92                      |
| SC6A1_RAT    | P23978                    | 2.92E+06                  | 2.91E+06                  | 4.91E+06                  | 3.58E+06                          | 4.45E+06                  | 5.48E+06                  | 5.42E+06                  | 5.12E+06                          | -0.5                              | -1.31                        | 0.11                     | 0.92                      |
| 1433Z_RAT    | P63102                    | 2.94E+08                  | 3.32E+08                  | 1.11E+08                  | 2.46E+08                          | 3.60E+07                  | 1.12E+08                  | 1.30E+08                  | 9.26E+07                          | 1.4                               | 1.31                         | 0.11                     | 0.92                      |
| CTNA2_MOUSE  | Q61301                    | 3.24E+07                  | 2.00E+07                  | 1.81E+07                  | 2.35E+07                          | 2.58E+07                  | 6.73E+07                  | 7.29E+07                  | 5.53E+07                          | -1.2                              | -1.31                        | 0.11                     | 0.92                      |
| CSK11_RAT    | Q8VHK2                    | 4.22E+06                  | 9.84E+06                  | 1.16E+07                  | 8.56E+06                          | 1.12E+07                  | 1.48E+07                  | 1.94E+07                  | 1.52E+07                          | -0.8                              | -1.30                        | 0.11                     | 0.92                      |
| 1433F_RAT    | P68511                    | 2.29E+08                  | 2.48E+08                  | 5.28E+07                  | 1.77E+08                          | 2.04E+07                  | 5.77E+07                  | 7.27E+07                  | 5.03E+07                          | 1.8                               | 1.28                         | 0.12                     | 0.91                      |
| DLG1_RAT     | Q62696                    | 4.27E+06                  | 6.71E+06                  | 1.15E+06                  | 4.04E+06                          | 1.17E+07                  | 7.68E+06                  | 2.54E+07                  | 1.49E+07                          | -1.9                              | -1.27                        | 0.12                     | 0.91                      |
| RIMB2_RAT    | Q9JIR1                    | 2.34E+07                  | 3.13E+07                  | 2.15E+07                  | 2.54E+07                          | 3.03E+05                  | 2.39E+07                  | 9.22E+06                  | 1.11E+07                          | 1.2                               | 1.26                         | 0.13                     | 0.90                      |
| CD59_RAT     | P27274                    | 5.96E+07                  | 9.09E+07                  | 8.89E+07                  | 7.98E+07                          | 8.53E+07                  | 1.20E+08                  | 1.24E+08                  | 1.10E+08                          | -0.5                              | -1.25                        | 0.13                     | 0.90                      |
| RASK_RAT     | P08644                    | 2.36E+07                  | 8.13E+06                  | 1.46E+07                  | 1.54E+07                          | 4.01E+06                  | 9.93E+06                  | 6.33E+06                  | 6.76E+06                          | 1.2                               | 1.22                         | 0.15                     | 0.89                      |
| TMOD2_RAT    | P70566                    | 7.18E+07                  | 5.73E+07                  | 9.54E+07                  | 7.48E+07                          | 2.31E+07                  | 6.33E+07                  | 5.04E+07                  | 4.56E+07                          | 0.7                               | 1.22                         | 0.15                     | 0.89                      |
| 1433G_RAT    | P61983                    | 2.90E+08                  | 2.98E+08                  | 1.18E+08                  | 2.35E+08                          | 9.62E+07                  | 1.34E+08                  | 1.48E+08                  | 1.26E+08                          | 0.9                               | 1.22                         | 0.15                     | 0.89                      |
| DLG2_RAT     | Q63622                    | 9.66E+07                  | 1.30E+08                  | 9.60E+07                  | 1.08E+08                          | 1.20E+08                  | 1.34E+08                  | 1.77E+08                  | 1.44E+08                          | -0.4                              | -1.20                        | 0.15                     | 0.88                      |
| ATPB_RAT     | P10719                    | 4.33E+07                  | 1.28E+08                  | 7.81E+07                  | 8.31E+07                          | 2.02E+07                  | 4.54E+07                  | 5.05E+07                  | 3.87E+07                          | 1.1                               | 1.18                         | 0.17                     | 0.88                      |
| CISD1_RAT    | B0K020                    | 1.85E+07                  | 2.61E+07                  | 2.33E+07                  | 2.26E+07                          | 2.42E+07                  | 5.20E+07                  | 9.21E+07                  | 5.61E+07                          | -1.3                              | -1.18                        | 0.17                     | 0.88                      |
| 2AAA_MOUSE   | Q76MZ3                    | 4.90E+07                  | 2.92E+07                  | 1.83E+07                  | 3.22E+07                          | 2.31E+07                  | 1.37E+08                  | 1.13E+08                  | 9.10E+07                          | -1.5                              | -1.16                        | 0.18                     | 0.87                      |
| CNKR2_RAT    | Q9Z1T4                    | 2.46E+06                  | 1.69E+07                  | 8.48E+06                  | 9.28E+06                          | 1.22E+07                  | 1.81E+07                  | 2.33E+07                  | 1.79E+07                          | -0.9                              | -1.15                        | 0.18                     | 0.87                      |
| H2B1N_BOVIN  | Q32L48                    | 4.18E+07                  | 9.33E+07                  | 8.20E+05                  | 4.53E+07                          | 2.38E+06                  | 6.16E+06                  | 1.63E+06                  | 3.39E+06                          | 3.7                               | 1.13                         | 0.19                     | 0.86                      |
| RHOG_MOUSE   | P84096                    | 1.45E+06                  | 3.83E+05                  | 2.14E+05                  | 6.83E+05                          | 2.95E+06                  | 4.86E+05                  | 5.01E+06                  | 2.82E+06                          | -2.0                              | -1.12                        | 0.19                     | 0.86                      |
| NEB2_RAT     | O35274                    | 2.27E+06                  | 3.44E+06                  | 3.35E+06                  | 3.02E+06                          | 3.50E+07                  | 7.53E+06                  | 8.41E+06                  | 1.70E+07                          | -2.5                              | -1.12                        | 0.20                     | 0.85                      |
| PCBP1_MOUSE  | P60335                    | 3.99E+07                  | 6.47E+07                  | 3.22E+07                  | 4.56E+07                          | 2.02E+07                  | 2.50E+07                  | 3.91E+07                  | 2.81E+07                          | 0.7                               | 1.12                         | 0.20                     | 0.85                      |
| MYO6_MOUSE   | Q64331                    | 1.13E+05                  | 6.75E+06                  | 1.11E+07                  | 5.99E+06                          | 5.79E+05                  | 3.82E+07                  | 3.94E+07                  | 2.61E+07                          | -2.1                              | -1.11                        | 0.20                     | 0.85                      |
| PGCB_RAT     | P55068                    | 7.02E+06                  | 2.33E+06                  | 4.31E+06                  | 4.55E+06                          | 3.89E+06                  | 9.92E+06                  | 1.52E+07                  | 9.66E+06                          | -1.1                              | -1.07                        | 0.22                     | 0.84                      |

Supplementary Table2

Supplementary Table2

|             |        |          |          |          |          |          |          |          |          |      |       |      |      |
|-------------|--------|----------|----------|----------|----------|----------|----------|----------|----------|------|-------|------|------|
| PKP4_MOUSE  | Q68FH0 | 1.29E+07 | 1.60E+07 | 2.03E+07 | 1.64E+07 | 1.82E+07 | 1.95E+07 | 2.09E+07 | 1.96E+07 | -0.3 | -1.03 | 0.24 | 0.82 |
| ARC1A_RAT   | Q99PD4 | 4.95E+07 | 5.00E+07 | 7.38E+07 | 5.78E+07 | 5.17E+06 | 2.14E+07 | 6.56E+07 | 3.07E+07 | 0.9  | 1.03  | 0.24 | 0.82 |
| SUCB1_MOUSE | Q922I9 | 1.62E+07 | 1.28E+07 | 1.35E+07 | 1.41E+07 | 1.92E+06 | 8.20E+06 | 1.56E+07 | 8.58E+06 | 0.7  | 1.03  | 0.25 | 0.82 |
| GRM2_RAT    | P31421 | 1.75E+07 | 8.96E+06 | 9.38E+06 | 1.19E+07 | 2.34E+06 | 1.03E+07 | 8.49E+06 | 7.03E+06 | 0.8  | 1.02  | 0.25 | 0.81 |
| SHLB2_RAT   | Q5PPJ9 | 3.43E+05 | 7.93E+05 | 3.36E+05 | 4.91E+05 | 3.19E+05 | 3.03E+05 | 2.39E+05 | 2.87E+05 | 0.8  | 1.01  | 0.25 | 0.81 |
| SHAN2_RAT   | Q9QX74 | 4.72E+07 | 7.44E+07 | 4.10E+07 | 5.42E+07 | 4.53E+07 | 9.50E+07 | 1.57E+08 | 9.90E+07 | -0.9 | -1.01 | 0.26 | 0.81 |
| NAC2_RAT    | P48768 | 6.56E+06 | 6.98E+06 | 4.63E+06 | 6.06E+06 | 6.45E+06 | 8.82E+06 | 6.93E+06 | 7.40E+06 | -0.3 | -1.00 | 0.26 | 0.81 |
| MAP2_RAT    | P15146 | 8.45E+07 | 1.98E+07 | 1.25E+07 | 3.89E+07 | 8.78E+06 | 1.18E+07 | 7.90E+06 | 9.48E+06 | 2.0  | 0.99  | 0.27 | 0.80 |
| UBIQ_RAT    | P62989 | 8.38E+07 | 6.11E+07 | 6.01E+07 | 6.83E+07 | 3.57E+07 | 6.10E+07 | 6.40E+07 | 5.36E+07 | 0.4  | 0.97  | 0.28 | 0.79 |
| HOME1_RAT   | Q92214 | 9.16E+07 | 9.95E+07 | 8.74E+07 | 9.29E+07 | 7.26E+07 | 1.45E+08 | 1.89E+08 | 1.35E+08 | -0.5 | -0.97 | 0.28 | 0.79 |
| GEPH_HUMAN  | Q9NQX3 | 2.92E+07 | 1.95E+08 | 3.27E+07 | 8.56E+07 | 9.85E+06 | 2.57E+07 | 1.65E+07 | 1.73E+07 | 2.3  | 0.96  | 0.28 | 0.79 |
| EF1A2_RAT   | P62632 | 1.37E+08 | 9.85E+07 | 1.39E+08 | 1.25E+08 | 1.61E+08 | 1.64E+08 | 1.21E+08 | 1.49E+08 | -0.3 | -0.96 | 0.28 | 0.79 |
| PTPRS_RAT   | Q64605 | 4.93E+07 | 1.55E+07 | 4.82E+07 | 3.77E+07 | 1.33E+07 | 3.81E+07 | 9.86E+06 | 2.04E+07 | 0.9  | 0.95  | 0.29 | 0.79 |
| LANC1_RAT   | Q9QX69 | 2.77E+06 | 1.62E+06 | 4.22E+05 | 1.60E+06 | 3.78E+06 | 1.62E+06 | 2.77E+06 | 2.72E+06 | -0.8 | -0.95 | 0.29 | 0.79 |
| SYNJ1_RAT   | Q62910 | 4.58E+05 | 3.75E+06 | 1.35E+06 | 1.85E+06 | 1.56E+07 | 3.15E+06 | 2.58E+06 | 7.09E+06 | -1.9 | -0.94 | 0.29 | 0.78 |
| MYO1D_RAT   | Q63357 | 6.17E+06 | 3.19E+05 | 1.19E+05 | 2.20E+06 | 3.23E+06 | 3.81E+06 | 1.15E+07 | 6.19E+06 | -1.5 | -0.94 | 0.30 | 0.78 |
| MAP4_RAT    | Q5M7W5 | 4.49E+07 | 4.41E+07 | 5.15E+07 | 4.68E+07 | 4.31E+07 | 6.41E+07 | 5.68E+07 | 5.47E+07 | -0.2 | -0.94 | 0.30 | 0.78 |
| U626A_MOUSE | Q8C3Q5 | 7.13E+06 | 5.24E+06 | 1.09E+07 | 7.77E+06 | 5.53E+06 | 2.31E+07 | 1.37E+07 | 1.41E+07 | -0.9 | -0.93 | 0.30 | 0.78 |
| DLGP3_MOUSE | Q6PFD5 | 1.63E+08 | 6.81E+07 | 3.74E+07 | 8.94E+07 | 1.90E+07 | 6.94E+07 | 3.57E+07 | 4.14E+07 | 1.1  | 0.93  | 0.30 | 0.78 |
| VATB2_RAT   | P62815 | 1.01E+09 | 1.67E+09 | 7.16E+08 | 1.13E+09 | 7.74E+08 | 6.85E+08 | 9.12E+08 | 7.91E+08 | 0.5  | 0.93  | 0.30 | 0.78 |
| RP3A_RAT    | P47709 | 1.39E+07 | 3.50E+06 | 5.99E+06 | 7.81E+06 | 3.84E+07 | 9.32E+06 | 1.08E+07 | 1.95E+07 | -1.3 | -0.92 | 0.31 | 0.77 |
| NFM_RAT     | P12839 | 3.26E+08 | 1.83E+08 | 2.27E+08 | 2.45E+08 | 1.96E+08 | 1.97E+08 | 1.95E+08 | 1.96E+08 | 0.3  | 0.92  | 0.31 | 0.77 |
| DYN1_RAT    | P21575 | 5.69E+08 | 4.23E+08 | 2.55E+08 | 4.16E+08 | 1.54E+08 | 4.02E+08 | 2.90E+08 | 2.82E+08 | 0.6  | 0.91  | 0.31 | 0.77 |
| EAA1_RAT    | P24942 | 4.44E+06 | 4.42E+05 | 2.82E+06 | 2.57E+06 | 8.63E+06 | 5.36E+07 | 1.35E+06 | 2.12E+07 | -3.0 | -0.90 | 0.32 | 0.77 |
| ECHB_RAT    | Q60587 | 1.86E+07 | 1.67E+07 | 1.48E+07 | 1.67E+07 | 1.09E+07 | 3.19E+07 | 3.05E+07 | 2.44E+07 | -0.5 | -0.90 | 0.32 | 0.76 |
| SNIP_RAT    | Q9QXY2 | 5.37E+08 | 9.64E+08 | 2.90E+08 | 5.97E+08 | 1.72E+08 | 4.71E+08 | 4.19E+08 | 3.54E+08 | 0.8  | 0.89  | 0.33 | 0.76 |
| MINK1_MOUSE | Q9JM52 | 5.68E+05 | 2.45E+07 | 1.53E+07 | 1.35E+07 | 4.56E+06 | 4.54E+07 | 3.86E+07 | 2.95E+07 | -1.1 | -0.89 | 0.33 | 0.76 |
| NRN1_RAT    | O08957 | 5.86E+06 | 3.78E+07 | 2.79E+07 | 2.39E+07 | 3.36E+07 | 4.91E+07 | 2.71E+07 | 3.66E+07 | -0.6 | -0.88 | 0.33 | 0.76 |
| ERC2_RAT    | Q8K3M6 | 1.99E+08 | 1.63E+08 | 1.06E+08 | 1.56E+08 | 1.14E+08 | 3.47E+08 | 2.43E+08 | 2.35E+08 | -0.6 | -0.87 | 0.34 | 0.75 |
| ADT1_MOUSE  | P48962 | 3.47E+08 | 4.45E+08 | 1.61E+08 | 3.18E+08 | 2.89E+08 | 5.63E+08 | 4.71E+08 | 4.41E+08 | -0.5 | -0.86 | 0.35 | 0.75 |
| AT1A1_RAT   | P06685 | 4.49E+08 | 6.92E+08 | 4.22E+08 | 5.21E+08 | 1.95E+08 | 3.74E+08 | 5.61E+08 | 3.76E+08 | 0.5  | 0.86  | 0.35 | 0.75 |
| DYL2_RAT    | Q78P75 | 5.26E+07 | 2.82E+07 | 2.45E+07 | 3.51E+07 | 3.88E+05 | 2.20E+08 | 8.96E+07 | 1.03E+08 | -1.6 | -0.85 | 0.35 | 0.74 |
| NLGN2_RAT   | Q62888 | 4.30E+06 | 1.26E+06 | 2.71E+06 | 2.76E+06 | 1.19E+06 | 2.02E+06 | 2.15E+06 | 1.79E+06 | 0.6  | 0.85  | 0.35 | 0.74 |
| SUCA_RAT    | P13086 | 8.64E+05 | 1.66E+06 | 1.71E+06 | 1.41E+06 | 5.11E+05 | 2.75E+06 | 1.11E+07 | 4.79E+06 | -1.8 | -0.84 | 0.36 | 0.74 |
| PRDX1_RAT   | Q63716 | 9.69E+07 | 1.06E+07 | 3.52E+06 | 3.70E+07 | 2.07E+06 | 1.00E+07 | 4.80E+06 | 5.63E+06 | 2.7  | 0.84  | 0.36 | 0.74 |
| ARP3_RAT    | Q4V7C7 | 4.31E+07 | 2.68E+07 | 9.99E+06 | 2.66E+07 | 6.90E+06 | 2.08E+07 | 1.97E+07 | 1.58E+07 | 0.8  | 0.83  | 0.36 | 0.74 |
| LSAMP_RAT   | Q62813 | 1.46E+08 | 9.29E+07 | 1.27E+08 | 1.22E+08 | 9.69E+07 | 1.95E+08 | 1.77E+08 | 1.56E+08 | -0.4 | -0.83 | 0.36 | 0.73 |
| ODPB_RAT    | P49432 | 2.77E+07 | 3.45E+06 | 1.67E+07 | 1.60E+07 | 2.48E+06 | 9.99E+06 | 1.23E+07 | 8.25E+06 | 1.0  | 0.83  | 0.37 | 0.73 |
| ODPB_RAT    | P49432 | 2.77E+07 | 3.45E+06 | 1.67E+07 | 1.60E+07 | 2.48E+06 | 9.99E+06 | 1.23E+07 | 8.25E+06 | 1.0  | 0.83  | 0.37 | 0.73 |
| CAPZB_RAT   | Q5XI32 | 1.24E+08 | 6.26E+07 | 8.04E+07 | 8.90E+07 | 4.44E+07 | 6.02E+07 | 9.25E+07 | 6.57E+07 | 0.4  | 0.82  | 0.37 | 0.73 |
| AT2B3_RAT   | Q64568 | 4.31E+07 | 5.61E+07 | 1.88E+07 | 3.93E+07 | 3.12E+07 | 3.06E+07 | 2.24E+07 | 2.81E+07 | 0.5  | 0.82  | 0.37 | 0.73 |
| MYH9_RAT    | Q62812 | 4.40E+06 | 2.02E+07 | 3.84E+07 | 2.10E+07 | 5.46E+06 | 7.73E+06 | 1.82E+07 | 1.05E+07 | 1.0  | 0.81  | 0.38 | 0.73 |
| KIF5C_MOUSE | P28738 | 8.67E+07 | 2.40E+06 | 1.43E+06 | 3.02E+07 | 3.60E+06 | 1.24E+06 | 1.65E+06 | 2.16E+06 | 3.8  | 0.81  | 0.38 | 0.72 |
| ABLM2_RAT   | Q6KC51 | 9.65E+05 | 2.37E+06 | 3.25E+06 | 2.20E+06 | 1.77E+06 | 3.70E+06 | 3.95E+06 | 3.14E+06 | -0.5 | -0.81 | 0.38 | 0.72 |
| AT2B2_RAT   | P11506 | 4.38E+07 | 5.61E+07 | 1.94E+07 | 3.98E+07 | 3.18E+07 | 3.13E+07 | 2.33E+07 | 2.88E+07 | 0.5  | 0.81  | 0.38 | 0.72 |

Supplementary Table2

|             |        |          |          |          |          |          |          |          |          |      |       |      |      |
|-------------|--------|----------|----------|----------|----------|----------|----------|----------|----------|------|-------|------|------|
| COR1C_MOUSE | Q9WUM4 | 4.03E+07 | 7.81E+06 | 1.16E+07 | 1.99E+07 | 2.29E+07 | 2.75E+07 | 4.58E+07 | 3.21E+07 | -0.7 | -0.80 | 0.38 | 0.72 |
| AP2B1_RAT   | P62944 | 3.98E+08 | 1.11E+08 | 7.93E+07 | 1.96E+08 | 4.22E+07 | 1.17E+08 | 1.22E+08 | 9.37E+07 | 1.1  | 0.80  | 0.38 | 0.72 |
| LIPA3_RAT   | Q91Z79 | 1.66E+08 | 1.26E+07 | 7.46E+07 | 8.46E+07 | 5.52E+06 | 5.52E+07 | 5.55E+07 | 3.87E+07 | 1.1  | 0.79  | 0.39 | 0.72 |
| CHCH3_MOUSE | Q9CRB9 | 8.71E+07 | 5.90E+07 | 6.15E+07 | 6.92E+07 | 4.94E+07 | 1.12E+08 | 1.11E+08 | 9.08E+07 | -0.4 | -0.79 | 0.39 | 0.71 |
| SEPT7_RAT   | Q9WVC0 | 4.74E+08 | 1.53E+08 | 1.35E+08 | 2.54E+08 | 9.55E+07 | 1.64E+08 | 1.80E+08 | 1.46E+08 | 0.8  | 0.78  | 0.39 | 0.71 |
| DLG4_RAT    | P31016 | 5.89E+08 | 1.81E+08 | 1.72E+08 | 3.14E+08 | 1.72E+08 | 7.62E+08 | 6.38E+08 | 5.24E+08 | -0.7 | -0.77 | 0.41 | 0.71 |
| DJC11_MOUSE | Q5U458 | 1.20E+07 | 1.62E+07 | 2.44E+06 | 1.02E+07 | 6.04E+06 | 1.73E+07 | 2.79E+07 | 1.71E+07 | -0.7 | -0.76 | 0.41 | 0.70 |
| NFL_RAT     | P19527 | 5.40E+08 | 4.16E+08 | 4.12E+08 | 4.56E+08 | 3.79E+08 | 3.39E+08 | 4.85E+08 | 4.01E+08 | 0.2  | 0.76  | 0.41 | 0.70 |
| ADA22_MOUSE | Q9R1V6 | 4.87E+06 | 2.25E+06 | 2.68E+06 | 3.27E+06 | 3.96E+06 | 9.65E+06 | 2.54E+06 | 5.39E+06 | -0.7 | -0.76 | 0.41 | 0.70 |
| BEGIN_RAT   | O88881 | 1.76E+08 | 6.78E+06 | 2.53E+06 | 6.17E+07 | 4.16E+06 | 1.59E+07 | 8.29E+06 | 9.45E+06 | 2.7  | 0.76  | 0.41 | 0.70 |
| OPCM_RAT    | P32736 | 4.13E+07 | 5.01E+07 | 5.04E+07 | 4.73E+07 | 7.52E+07 | 4.44E+07 | 4.95E+07 | 5.64E+07 | -0.3 | -0.76 | 0.41 | 0.70 |
| ACSL6_RAT   | P33124 | 4.50E+06 | 1.15E+05 | 2.34E+06 | 2.32E+06 | 4.83E+06 | 1.19E+07 | 1.69E+05 | 5.63E+06 | -1.3 | -0.76 | 0.41 | 0.70 |
| VIME_RAT    | P31000 | 7.82E+07 | 1.40E+08 | 1.15E+08 | 1.11E+08 | 1.31E+08 | 6.42E+07 | 5.97E+07 | 8.49E+07 | 0.4  | 0.75  | 0.42 | 0.70 |
| ICAM5_MOUSE | Q60625 | 2.47E+06 | 7.58E+06 | 2.60E+07 | 1.20E+07 | 3.97E+06 | 5.53E+06 | 7.20E+06 | 5.57E+06 | 1.1  | 0.75  | 0.42 | 0.70 |
| EFTU5_RAT   | P85834 | 6.83E+07 | 9.84E+07 | 6.42E+06 | 5.77E+07 | 5.48E+07 | 8.87E+07 | 1.16E+08 | 8.64E+07 | -0.6 | -0.74 | 0.43 | 0.69 |
| EF1A1_RAT   | P62630 | 1.51E+08 | 1.12E+08 | 1.43E+08 | 1.35E+08 | 1.61E+08 | 1.64E+08 | 1.26E+08 | 1.50E+08 | -0.2 | -0.74 | 0.43 | 0.69 |
| GRM5_RAT    | P31424 | 3.91E+06 | 1.18E+07 | 2.71E+05 | 5.32E+06 | 4.17E+06 | 1.49E+07 | 9.07E+06 | 9.36E+06 | -0.8 | -0.74 | 0.43 | 0.69 |
| BAIP2_RAT   | Q6GMN2 | 4.11E+08 | 6.67E+08 | 2.62E+08 | 4.47E+08 | 3.42E+08 | 3.30E+08 | 3.57E+08 | 3.43E+08 | 0.4  | 0.73  | 0.43 | 0.69 |
| ABLM1_MOUSE | Q8K4G5 | 7.37E+06 | 4.90E+06 | 3.39E+06 | 5.22E+06 | 4.10E+05 | 5.52E+06 | 5.72E+07 | 2.10E+07 | -2.0 | -0.73 | 0.43 | 0.69 |
| CLAP2_RAT   | Q99JD4 | 7.00E+06 | 1.01E+08 | 1.41E+08 | 8.29E+07 | 1.40E+07 | 9.67E+07 | 1.24E+07 | 4.10E+07 | 1.0  | 0.72  | 0.44 | 0.68 |
| S12A5_RAT   | Q63633 | 6.54E+06 | 2.20E+06 | 2.12E+06 | 3.62E+06 | 1.67E+06 | 2.93E+06 | 2.38E+06 | 2.33E+06 | 0.6  | 0.72  | 0.44 | 0.68 |
| COR2B_MOUSE | Q8BH44 | 1.39E+07 | 3.36E+06 | 2.84E+06 | 6.70E+06 | 7.28E+05 | 5.12E+06 | 4.43E+06 | 3.42E+06 | 1.0  | 0.71  | 0.44 | 0.68 |
| IP3KA_RAT   | P17105 | 3.16E+06 | 3.65E+07 | 2.57E+07 | 2.18E+07 | 9.68E+06 | 1.02E+07 | 1.94E+07 | 1.31E+07 | 0.7  | 0.71  | 0.45 | 0.68 |
| MFF_MOUSE   | Q6PCP5 | 5.53E+07 | 1.19E+07 | 1.11E+07 | 2.61E+07 | 5.33E+06 | 2.09E+07 | 1.36E+07 | 1.33E+07 | 1.0  | 0.71  | 0.45 | 0.68 |
| AT1B1_RAT   | P07340 | 1.77E+08 | 2.49E+08 | 1.52E+08 | 1.93E+08 | 8.01E+07 | 2.05E+08 | 1.75E+08 | 1.53E+08 | 0.3  | 0.70  | 0.45 | 0.68 |
| PRR7_RAT    | POC6T3 | 4.02E+06 | 3.86E+06 | 3.65E+06 | 3.84E+06 | 2.44E+06 | 6.03E+06 | 6.11E+06 | 4.86E+06 | -0.3 | -0.70 | 0.45 | 0.68 |
| ENPP6_RAT   | BOBND0 | 1.48E+08 | 4.27E+07 | 2.56E+07 | 7.22E+07 | 1.25E+07 | 4.88E+07 | 5.37E+07 | 3.84E+07 | 0.9  | 0.70  | 0.45 | 0.68 |
| ODP2_RAT    | P08461 | 1.28E+07 | 1.39E+07 | 1.25E+07 | 1.31E+07 | 4.02E+06 | 1.89E+07 | 4.11E+06 | 9.00E+06 | 0.5  | 0.70  | 0.46 | 0.67 |
| GPDM_RAT    | P35571 | 7.49E+07 | 2.18E+07 | 6.90E+06 | 3.45E+07 | 2.74E+05 | 2.93E+07 | 1.90E+07 | 1.62E+07 | 1.1  | 0.69  | 0.46 | 0.67 |
| SYN1_RAT    | P09951 | 1.79E+09 | 1.32E+09 | 1.24E+09 | 1.45E+09 | 1.30E+09 | 1.65E+09 | 2.10E+09 | 1.68E+09 | -0.2 | -0.69 | 0.46 | 0.67 |
| IMMT_MOUSE  | Q8CAQ8 | 5.83E+08 | 2.11E+08 | 2.89E+08 | 3.61E+08 | 3.07E+08 | 5.25E+08 | 6.02E+08 | 4.78E+08 | -0.4 | -0.69 | 0.46 | 0.67 |
| LGI1_RAT    | Q8K4Y5 | 9.42E+07 | 6.86E+07 | 5.54E+07 | 7.27E+07 | 3.81E+07 | 7.29E+07 | 6.89E+07 | 6.00E+07 | 0.3  | 0.68  | 0.47 | 0.67 |
| MACF1_MOUSE | Q9QXZ0 | 3.49E+06 | 4.64E+06 | 5.35E+06 | 4.49E+06 | 2.82E+06 | 1.23E+07 | 5.33E+06 | 6.80E+06 | -0.6 | -0.68 | 0.47 | 0.67 |
| AT1A3_RAT   | P06687 | 6.26E+08 | 8.59E+08 | 6.57E+08 | 7.14E+08 | 3.87E+08 | 6.92E+08 | 7.43E+08 | 6.08E+08 | 0.2  | 0.68  | 0.47 | 0.66 |
| NDUV2_RAT   | P19234 | 1.29E+07 | 5.15E+07 | 9.94E+06 | 2.48E+07 | 2.98E+06 | 2.10E+07 | 1.59E+07 | 1.33E+07 | 0.9  | 0.68  | 0.47 | 0.66 |
| SEPT6_MOUSE | Q9R1T4 | 6.42E+07 | 1.32E+07 | 4.72E+07 | 4.15E+07 | 7.14E+06 | 1.67E+07 | 5.25E+07 | 2.54E+07 | 0.7  | 0.67  | 0.47 | 0.66 |
| AKAP5_RAT   | P24587 | 7.05E+06 | 3.48E+06 | 1.51E+07 | 8.54E+06 | 9.68E+06 | 1.16E+07 | 1.27E+07 | 1.13E+07 | -0.4 | -0.67 | 0.47 | 0.66 |
| LRFN6_MOUSE | Q68FM6 | 9.42E+06 | 5.19E+06 | 3.14E+07 | 1.53E+07 | 3.98E+06 | 1.19E+07 | 1.00E+07 | 8.65E+06 | 0.8  | 0.67  | 0.47 | 0.66 |
| VATE1_RAT   | Q6PCU2 | 7.72E+07 | 1.58E+08 | 7.74E+07 | 1.04E+08 | 3.47E+07 | 1.14E+08 | 8.04E+07 | 7.63E+07 | 0.4  | 0.67  | 0.47 | 0.66 |
| H2A1_RAT    | P02262 | 2.47E+08 | 2.79E+08 | 2.13E+08 | 2.46E+08 | 1.39E+08 | 2.70E+08 | 2.28E+08 | 2.12E+08 | 0.2  | 0.67  | 0.48 | 0.66 |
| ACTN1_RAT   | Q9Z1P2 | 2.72E+07 | 4.74E+07 | 5.30E+07 | 4.25E+07 | 2.77E+07 | 1.19E+08 | 4.78E+07 | 6.49E+07 | -0.6 | -0.66 | 0.48 | 0.66 |
| NCDN_RAT    | O35095 | 1.62E+07 | 3.64E+06 | 4.11E+06 | 7.99E+06 | 9.15E+05 | 7.42E+06 | 5.30E+06 | 4.54E+06 | 0.8  | 0.65  | 0.49 | 0.65 |
| VATA_MOUSE  | P50516 | 1.85E+08 | 3.38E+08 | 1.55E+08 | 2.26E+08 | 8.63E+07 | 2.51E+08 | 1.72E+08 | 1.70E+08 | 0.4  | 0.65  | 0.49 | 0.65 |
| ADDB_RAT    | Q05764 | 3.96E+07 | 3.24E+07 | 2.21E+07 | 3.14E+07 | 7.51E+06 | 6.16E+07 | 7.10E+07 | 4.67E+07 | -0.6 | -0.64 | 0.49 | 0.65 |
| GBB1_RAT    | P54311 | 5.53E+08 | 3.00E+08 | 2.36E+08 | 3.63E+08 | 1.66E+08 | 3.36E+08 | 3.39E+08 | 2.80E+08 | 0.4  | 0.63  | 0.50 | 0.64 |

Supplementary Table2

|             |        |          |          |          |          |          |          |          |          |      |       |      |      |
|-------------|--------|----------|----------|----------|----------|----------|----------|----------|----------|------|-------|------|------|
| KIF2A_RAT   | Q9WV63 | 6.90E+07 | 4.55E+07 | 3.09E+07 | 4.85E+07 | 1.71E+07 | 5.04E+07 | 4.45E+07 | 3.74E+07 | 0.4  | 0.63  | 0.50 | 0.64 |
| KIF2A_RAT   | Q9WV63 | 6.90E+07 | 4.55E+07 | 3.09E+07 | 4.85E+07 | 1.71E+07 | 5.04E+07 | 4.45E+07 | 3.74E+07 | 0.4  | 0.63  | 0.50 | 0.64 |
| BCAS1_RAT   | Q3ZB98 | 2.34E+07 | 1.48E+08 | 1.76E+06 | 5.78E+07 | 5.14E+07 | 5.31E+06 | 1.19E+07 | 2.29E+07 | 1.3  | 0.63  | 0.51 | 0.64 |
| SEP11_MOUSE | Q8C1B7 | 2.40E+08 | 1.37E+08 | 1.40E+08 | 1.72E+08 | 8.97E+07 | 1.37E+08 | 1.92E+08 | 1.40E+08 | 0.3  | 0.62  | 0.51 | 0.64 |
| KAPCB_RAT   | P68182 | 6.12E+07 | 3.08E+06 | 2.36E+06 | 2.22E+07 | 3.08E+06 | 1.39E+07 | 6.58E+06 | 7.85E+06 | 1.5  | 0.62  | 0.51 | 0.64 |
| DPYL2_RAT   | P47942 | 6.20E+08 | 5.45E+08 | 3.82E+08 | 5.16E+08 | 4.29E+08 | 4.89E+08 | 4.71E+08 | 4.63E+08 | 0.2  | 0.62  | 0.51 | 0.64 |
| MYH10_RAT   | Q9JLT0 | 8.39E+07 | 1.76E+08 | 1.09E+08 | 1.23E+08 | 4.87E+07 | 1.01E+08 | 1.39E+08 | 9.61E+07 | 0.4  | 0.61  | 0.52 | 0.63 |
| AINX_RAT    | P23565 | 1.38E+09 | 8.58E+08 | 8.14E+08 | 1.02E+09 | 7.51E+08 | 9.69E+08 | 9.21E+08 | 8.80E+08 | 0.2  | 0.61  | 0.52 | 0.63 |
| CLH_RAT     | P11442 | 1.14E+08 | 5.24E+07 | 4.99E+07 | 7.21E+07 | 3.45E+07 | 4.92E+07 | 3.52E+08 | 1.45E+08 | -1.0 | -0.60 | 0.53 | 0.63 |
| NTRI_MOUSE  | Q99PJ0 | 3.35E+07 | 4.30E+07 | 8.99E+07 | 5.54E+07 | 5.23E+06 | 2.84E+08 | 5.74E+07 | 1.15E+08 | -1.1 | -0.59 | 0.53 | 0.62 |
| GBB2_RAT    | P54313 | 4.81E+08 | 2.29E+08 | 1.66E+08 | 2.92E+08 | 1.27E+08 | 2.74E+08 | 2.56E+08 | 2.19E+08 | 0.4  | 0.59  | 0.53 | 0.62 |
| TMM11_RAT   | BOBN86 | 1.49E+06 | 3.45E+06 | 1.40E+06 | 2.11E+06 | 8.14E+05 | 9.57E+05 | 1.29E+07 | 4.88E+06 | -1.2 | -0.59 | 0.53 | 0.62 |
| GBRB3_RAT   | P63079 | 1.41E+06 | 9.04E+05 | 1.04E+06 | 1.12E+06 | 7.43E+05 | 2.54E+06 | 1.21E+06 | 1.50E+06 | -0.4 | -0.59 | 0.53 | 0.62 |
| AT2B1_RAT   | P11505 | 6.44E+07 | 6.47E+07 | 2.39E+07 | 5.10E+07 | 5.55E+07 | 3.22E+07 | 3.40E+07 | 4.06E+07 | 0.3  | 0.58  | 0.54 | 0.62 |
| CSK21_RAT   | P19139 | 1.56E+06 | 1.96E+06 | 7.92E+05 | 1.44E+06 | 7.10E+04 | 3.20E+05 | 2.33E+06 | 9.07E+05 | 0.7  | 0.58  | 0.54 | 0.62 |
| SPTA2_RAT   | P16086 | 3.24E+09 | 1.79E+09 | 2.14E+09 | 2.39E+09 | 1.71E+09 | 3.05E+09 | 3.95E+09 | 2.91E+09 | -0.3 | -0.57 | 0.55 | 0.61 |
| NSF_RAT     | Q9QUL6 | 3.18E+08 | 3.75E+08 | 1.31E+08 | 2.74E+08 | 3.61E+08 | 3.19E+08 | 2.93E+08 | 3.24E+08 | -0.2 | -0.57 | 0.55 | 0.61 |
| U626B_MOUSE | Q3UH99 | 3.43E+07 | 7.62E+07 | 1.97E+07 | 4.34E+07 | 2.93E+06 | 5.87E+07 | 2.25E+07 | 2.80E+07 | 0.6  | 0.57  | 0.55 | 0.61 |
| MYPR_RAT    | P60203 | 4.66E+08 | 3.05E+08 | 3.64E+08 | 3.78E+08 | 2.53E+08 | 3.40E+08 | 4.13E+08 | 3.35E+08 | 0.2  | 0.56  | 0.55 | 0.61 |
| ACTN4_RAT   | Q9QXQ0 | 2.95E+07 | 1.97E+07 | 2.25E+07 | 2.39E+07 | 6.81E+05 | 3.07E+07 | 9.31E+07 | 4.15E+07 | -0.8 | -0.56 | 0.55 | 0.61 |
| NCAN_RAT    | P55067 | 1.27E+08 | 6.09E+07 | 6.09E+07 | 8.31E+07 | 4.60E+07 | 8.54E+07 | 6.99E+07 | 6.71E+07 | 0.3  | 0.56  | 0.56 | 0.61 |
| HOME3_RAT   | Q9Z2X5 | 1.28E+07 | 1.60E+07 | 1.63E+07 | 1.50E+07 | 8.70E+06 | 1.84E+07 | 1.21E+07 | 1.31E+07 | 0.2  | 0.56  | 0.56 | 0.61 |
| NDKA_RAT    | Q05982 | 1.18E+07 | 1.21E+06 | 1.17E+07 | 8.24E+06 | 6.12E+06 | 1.32E+07 | 1.36E+07 | 1.10E+07 | -0.4 | -0.55 | 0.56 | 0.61 |
| RLA2_RAT    | P02401 | 1.55E+07 | 1.38E+07 | 1.41E+07 | 1.44E+07 | 3.59E+06 | 3.76E+07 | 2.07E+07 | 2.06E+07 | -0.5 | -0.55 | 0.56 | 0.60 |
| GHC1_MOUSE  | Q9D6M3 | 5.42E+08 | 2.50E+08 | 9.06E+07 | 2.94E+08 | 1.73E+08 | 5.07E+08 | 5.36E+08 | 4.05E+08 | -0.5 | -0.55 | 0.56 | 0.60 |
| CTNB1_RAT   | Q9WU82 | 2.43E+08 | 1.05E+08 | 7.88E+07 | 1.42E+08 | 6.47E+07 | 1.18E+08 | 1.39E+08 | 1.07E+08 | 0.4  | 0.55  | 0.56 | 0.60 |
| TOM20_MOUSE | Q62760 | 1.14E+08 | 7.02E+07 | 6.09E+07 | 8.19E+07 | 1.30E+07 | 1.34E+08 | 1.87E+07 | 5.51E+07 | 0.6  | 0.55  | 0.56 | 0.60 |
| QCR2_RAT    | P32551 | 1.95E+07 | 7.98E+07 | 1.88E+07 | 3.94E+07 | 1.11E+06 | 4.76E+07 | 2.45E+07 | 2.44E+07 | 0.7  | 0.54  | 0.57 | 0.60 |
| AT1A2_RAT   | P06686 | 4.74E+08 | 6.84E+08 | 5.06E+08 | 5.55E+08 | 3.01E+08 | 5.76E+08 | 5.79E+08 | 4.85E+08 | 0.2  | 0.54  | 0.57 | 0.60 |
| DCLK1_MOUSE | Q9JLM8 | 8.89E+07 | 4.25E+07 | 3.83E+07 | 5.66E+07 | 1.83E+07 | 5.21E+07 | 6.16E+07 | 4.40E+07 | 0.4  | 0.53  | 0.58 | 0.59 |
| ATPA_RAT    | P15999 | 1.19E+08 | 2.25E+08 | 1.06E+08 | 1.50E+08 | 1.55E+08 | 1.22E+08 | 9.86E+07 | 1.25E+08 | 0.3  | 0.53  | 0.58 | 0.59 |
| FYN_RAT     | Q62844 | 2.23E+07 | 5.12E+07 | 7.18E+07 | 4.85E+07 | 2.27E+07 | 4.79E+07 | 4.53E+07 | 3.86E+07 | 0.3  | 0.52  | 0.58 | 0.59 |
| VPP1_RAT    | P25286 | 2.85E+08 | 3.74E+08 | 1.89E+08 | 2.83E+08 | 1.32E+08 | 3.51E+08 | 2.17E+08 | 2.33E+08 | 0.3  | 0.52  | 0.58 | 0.59 |
| SNPH_MOUSE  | Q80U23 | 2.24E+05 | 4.23E+07 | 1.17E+06 | 1.46E+07 | 8.19E+05 | 3.85E+05 | 1.61E+07 | 5.76E+06 | 1.3  | 0.52  | 0.58 | 0.59 |
| CNTP1_RAT   | P97846 | 4.73E+08 | 2.02E+08 | 2.47E+08 | 3.07E+08 | 9.39E+07 | 3.45E+08 | 2.84E+08 | 2.41E+08 | 0.4  | 0.51  | 0.59 | 0.59 |
| AGAP2_RAT   | Q8CGU4 | 3.35E+06 | 1.16E+07 | 3.89E+06 | 6.28E+06 | 5.76E+06 | 1.19E+07 | 6.88E+06 | 8.19E+06 | -0.4 | -0.51 | 0.59 | 0.59 |
| SYN2_RAT    | Q63537 | 8.38E+08 | 5.19E+08 | 5.00E+08 | 6.19E+08 | 5.49E+08 | 6.48E+08 | 9.39E+08 | 7.12E+08 | -0.2 | -0.51 | 0.59 | 0.59 |
| NEUM_RAT    | P07936 | 1.16E+08 | 9.83E+07 | 1.45E+08 | 1.20E+08 | 6.93E+07 | 1.73E+08 | 1.85E+08 | 1.42E+08 | -0.2 | -0.50 | 0.60 | 0.58 |
| MAP1A_RAT   | P34926 | 2.25E+08 | 3.67E+08 | 2.08E+08 | 2.66E+08 | 4.47E+08 | 2.51E+08 | 2.44E+08 | 3.14E+08 | -0.2 | -0.50 | 0.60 | 0.58 |
| ADT2_RAT    | Q09073 | 4.89E+08 | 2.92E+08 | 1.42E+08 | 3.08E+08 | 2.48E+08 | 4.25E+08 | 4.51E+08 | 3.75E+08 | -0.3 | -0.49 | 0.60 | 0.58 |
| NEGR1_RAT   | Q9Z0J8 | 1.03E+08 | 3.89E+07 | 4.58E+07 | 6.25E+07 | 2.03E+07 | 7.10E+07 | 5.38E+07 | 4.84E+07 | 0.4  | 0.49  | 0.60 | 0.58 |
| MAP6_RAT    | Q63560 | 4.93E+08 | 4.54E+08 | 4.94E+08 | 4.80E+08 | 4.01E+08 | 5.17E+08 | 6.42E+08 | 5.20E+08 | -0.1 | -0.49 | 0.61 | 0.58 |
| TOM22_MOUSE | Q9CPQ3 | 4.07E+07 | 1.56E+07 | 7.86E+06 | 2.14E+07 | 5.74E+06 | 2.08E+07 | 1.94E+07 | 1.53E+07 | 0.5  | 0.49  | 0.61 | 0.57 |
| RB6I2_RAT   | Q811U3 | 1.50E+08 | 1.01E+08 | 7.08E+07 | 1.07E+08 | 8.52E+07 | 1.36E+08 | 1.49E+08 | 1.24E+08 | -0.2 | -0.48 | 0.61 | 0.57 |
| SEPT9_RAT   | Q9QZR6 | 6.79E+06 | 2.34E+07 | 6.35E+06 | 1.22E+07 | 2.46E+06 | 7.57E+06 | 5.52E+07 | 2.17E+07 | -0.8 | -0.48 | 0.62 | 0.57 |

Supplementary Table2

|             |        |          |          |          |          |          |          |          |          |      |       |      |      |
|-------------|--------|----------|----------|----------|----------|----------|----------|----------|----------|------|-------|------|------|
| NFH_MOUSE   | P19246 | 2.12E+08 | 1.04E+08 | 1.71E+08 | 1.62E+08 | 1.63E+08 | 1.13E+08 | 1.53E+08 | 1.43E+08 | 0.2  | 0.48  | 0.62 | 0.57 |
| GTR1_RAT    | P11167 | 3.74E+07 | 2.62E+07 | 3.30E+07 | 3.22E+07 | 9.02E+06 | 4.92E+07 | 1.84E+07 | 2.55E+07 | 0.3  | 0.47  | 0.62 | 0.57 |
| KPCG_RAT    | P63319 | 5.08E+07 | 5.84E+07 | 7.96E+07 | 6.29E+07 | 3.58E+07 | 1.30E+08 | 6.93E+07 | 7.82E+07 | -0.3 | -0.47 | 0.62 | 0.57 |
| MOG_RAT     | Q63345 | 2.27E+08 | 1.08E+08 | 1.47E+08 | 1.61E+08 | 1.35E+08 | 1.36E+08 | 1.56E+08 | 1.42E+08 | 0.2  | 0.47  | 0.62 | 0.57 |
| BIN1_RAT    | O08839 | 6.76E+06 | 3.30E+07 | 2.05E+07 | 2.01E+07 | 1.40E+07 | 2.22E+07 | 4.14E+07 | 2.58E+07 | -0.4 | -0.46 | 0.63 | 0.56 |
| UN13A_RAT   | Q62768 | 5.04E+06 | 6.55E+06 | 4.13E+06 | 5.24E+06 | 2.92E+06 | 9.53E+06 | 6.42E+06 | 6.29E+06 | -0.3 | -0.46 | 0.63 | 0.56 |
| NFASC_RAT   | P97685 | 3.98E+08 | 6.47E+08 | 2.32E+08 | 4.25E+08 | 4.12E+08 | 3.54E+08 | 7.92E+08 | 5.19E+08 | -0.3 | -0.45 | 0.63 | 0.56 |
| VAPA_RAT    | Q92270 | 6.89E+06 | 8.20E+06 | 8.59E+06 | 7.89E+06 | 4.24E+05 | 1.19E+07 | 2.00E+07 | 1.07E+07 | -0.4 | -0.44 | 0.64 | 0.56 |
| COX2_RAT    | P00406 | 1.72E+07 | 1.32E+08 | 3.61E+07 | 6.16E+07 | 8.48E+06 | 6.49E+07 | 5.24E+07 | 4.19E+07 | 0.6  | 0.44  | 0.64 | 0.56 |
| HPLN1_RAT   | P03994 | 1.06E+08 | 6.56E+07 | 3.29E+07 | 6.82E+07 | 3.49E+07 | 7.59E+07 | 5.76E+07 | 5.61E+07 | 0.3  | 0.44  | 0.64 | 0.55 |
| RIMS1_RAT   | Q9JIR4 | 1.10E+08 | 1.62E+07 | 4.14E+06 | 4.35E+07 | 1.83E+06 | 4.11E+07 | 3.44E+07 | 2.58E+07 | 0.8  | 0.44  | 0.65 | 0.55 |
| GRIA2_RAT   | P19491 | 2.58E+08 | 1.47E+08 | 1.45E+08 | 1.84E+08 | 7.69E+07 | 1.94E+08 | 1.99E+08 | 1.56E+08 | 0.2  | 0.44  | 0.65 | 0.55 |
| ABCB8_RAT   | Q5RKI8 | 2.48E+07 | 2.93E+07 | 1.72E+07 | 2.38E+07 | 7.49E+06 | 3.68E+07 | 4.41E+07 | 2.95E+07 | -0.3 | -0.43 | 0.65 | 0.55 |
| FLOT2_RAT   | Q9Z2S9 | 4.72E+07 | 6.89E+07 | 9.98E+07 | 7.20E+07 | 9.00E+06 | 1.46E+08 | 1.27E+08 | 9.41E+07 | -0.4 | -0.43 | 0.65 | 0.55 |
| RL18_RAT    | P12001 | 8.16E+06 | 2.38E+07 | 1.32E+07 | 1.51E+07 | 3.01E+06 | 1.14E+07 | 2.08E+07 | 1.17E+07 | 0.4  | 0.43  | 0.66 | 0.55 |
| TAGL3_RAT   | P37805 | 1.30E+08 | 6.37E+07 | 6.91E+07 | 8.75E+07 | 1.30E+07 | 1.12E+08 | 8.59E+07 | 7.02E+07 | 0.3  | 0.42  | 0.66 | 0.55 |
| CPNE4_HUMAN | Q96A23 | 1.19E+06 | 7.40E+06 | 1.29E+06 | 3.29E+06 | 9.71E+05 | 3.01E+06 | 2.83E+06 | 2.27E+06 | 0.5  | 0.42  | 0.66 | 0.55 |
| PROF2_RAT   | Q9EPC6 | 1.41E+07 | 3.28E+07 | 2.67E+07 | 2.45E+07 | 2.55E+07 | 2.44E+07 | 3.20E+07 | 2.73E+07 | -0.2 | -0.41 | 0.67 | 0.54 |
| GFAP_RAT    | P47819 | 1.28E+09 | 6.24E+08 | 4.29E+08 | 7.77E+08 | 5.66E+08 | 1.05E+09 | 1.16E+09 | 9.23E+08 | -0.2 | -0.41 | 0.67 | 0.54 |
| GDAP1_MOUSE | O88741 | 2.10E+08 | 7.78E+07 | 5.75E+07 | 1.15E+08 | 5.84E+07 | 2.21E+08 | 1.58E+08 | 1.46E+08 | -0.3 | -0.41 | 0.67 | 0.54 |
| EAA2_RAT    | P31596 | 5.83E+06 | 2.48E+05 | 2.91E+07 | 1.17E+07 | 1.30E+07 | 2.68E+07 | 9.55E+06 | 1.65E+07 | -0.5 | -0.41 | 0.67 | 0.54 |
| DLGP1_RAT   | P97836 | 7.82E+07 | 7.50E+07 | 5.70E+07 | 7.01E+07 | 1.37E+07 | 9.29E+07 | 7.00E+07 | 5.89E+07 | 0.3  | 0.41  | 0.67 | 0.54 |
| CY5B_RAT    | P04166 | 2.14E+07 | 9.22E+07 | 2.39E+07 | 4.58E+07 | 1.52E+06 | 6.68E+07 | 2.92E+07 | 3.25E+07 | 0.5  | 0.40  | 0.68 | 0.53 |
| DLG3_RAT    | Q62936 | 5.41E+07 | 8.46E+07 | 6.89E+07 | 6.92E+07 | 4.42E+07 | 7.24E+07 | 1.24E+08 | 8.01E+07 | -0.2 | -0.39 | 0.68 | 0.53 |
| VDAC1_RAT   | Q922L0 | 6.02E+09 | 3.19E+09 | 2.81E+09 | 4.01E+09 | 2.50E+09 | 5.07E+09 | 6.42E+09 | 4.67E+09 | -0.2 | -0.38 | 0.69 | 0.53 |
| THY1_RAT    | P01830 | 4.33E+08 | 5.67E+08 | 6.29E+08 | 5.43E+08 | 2.39E+08 | 7.51E+08 | 9.09E+08 | 6.33E+08 | -0.2 | -0.38 | 0.69 | 0.53 |
| TPM3_RAT    | Q63610 | 6.55E+06 | 4.29E+06 | 2.45E+07 | 1.18E+07 | 1.41E+07 | 1.98E+07 | 1.02E+07 | 1.47E+07 | -0.3 | -0.38 | 0.70 | 0.53 |
| COX5A_RAT   | P11240 | 1.87E+08 | 8.61E+07 | 8.15E+07 | 1.18E+08 | 1.60E+07 | 1.17E+08 | 1.54E+08 | 9.56E+07 | 0.3  | 0.38  | 0.70 | 0.53 |
| AP2A2_RAT   | P18484 | 1.86E+08 | 1.92E+08 | 2.08E+08 | 1.95E+08 | 7.60E+07 | 6.03E+08 | 1.18E+08 | 2.65E+08 | -0.4 | -0.37 | 0.70 | 0.52 |
| NMDE2_MOUSE | Q01097 | 2.02E+08 | 1.00E+08 | 8.44E+07 | 1.29E+08 | 9.40E+07 | 1.58E+08 | 1.92E+08 | 1.48E+08 | -0.2 | -0.37 | 0.70 | 0.52 |
| CN37_RAT    | P13233 | 5.06E+08 | 3.25E+08 | 3.23E+08 | 3.85E+08 | 2.63E+08 | 3.63E+08 | 4.32E+08 | 3.53E+08 | 0.1  | 0.37  | 0.70 | 0.52 |
| GNAO_RAT    | P59215 | 1.95E+09 | 9.44E+08 | 8.75E+08 | 1.26E+09 | 7.98E+08 | 1.21E+09 | 1.29E+09 | 1.10E+09 | 0.2  | 0.37  | 0.70 | 0.52 |
| NOE1_RAT    | Q62609 | 3.87E+07 | 2.66E+07 | 3.74E+07 | 3.42E+07 | 2.74E+07 | 3.70E+07 | 3.26E+07 | 3.23E+07 | 0.1  | 0.36  | 0.71 | 0.52 |
| RAB10_MOUSE | P61027 | 1.58E+08 | 6.07E+07 | 4.41E+07 | 8.77E+07 | 2.84E+07 | 9.16E+07 | 9.34E+07 | 7.11E+07 | 0.3  | 0.36  | 0.71 | 0.52 |
| SAM50_RAT   | Q6AXV4 | 1.98E+08 | 5.93E+07 | 5.12E+07 | 1.03E+08 | 3.22E+07 | 1.05E+08 | 1.07E+08 | 8.16E+07 | 0.3  | 0.35  | 0.71 | 0.52 |
| LPHN1_RAT   | O88917 | 1.13E+06 | 1.34E+06 | 3.15E+07 | 1.13E+07 | 5.39E+06 | 4.78E+07 | 1.62E+06 | 1.83E+07 | -0.7 | -0.35 | 0.72 | 0.51 |
| ACTBL_HUMAN | Q562R1 | 3.35E+09 | 6.97E+09 | 3.68E+09 | 4.67E+09 | 2.02E+09 | 5.48E+09 | 4.69E+09 | 4.06E+09 | 0.2  | 0.35  | 0.72 | 0.51 |
| IQEC2_MOUSE | Q5DU25 | 5.74E+07 | 6.99E+07 | 2.22E+07 | 4.98E+07 | 3.15E+07 | 7.56E+07 | 6.50E+07 | 5.74E+07 | -0.2 | -0.35 | 0.72 | 0.51 |
| KCNA1_RAT   | P10499 | 2.43E+07 | 1.47E+07 | 6.50E+06 | 1.52E+07 | 5.95E+06 | 1.41E+07 | 1.82E+07 | 1.28E+07 | 0.3  | 0.35  | 0.72 | 0.51 |
| MTCH2_MOUSE | Q791V5 | 3.12E+08 | 1.47E+08 | 1.02E+08 | 1.87E+08 | 9.16E+07 | 1.29E+08 | 2.49E+08 | 1.57E+08 | 0.3  | 0.35  | 0.72 | 0.51 |
| CADH2_RAT   | Q9Z1Y3 | 9.05E+06 | 9.43E+06 | 1.17E+07 | 1.01E+07 | 5.65E+06 | 1.50E+07 | 5.92E+06 | 8.84E+06 | 0.2  | 0.34  | 0.72 | 0.51 |
| DREB_RAT    | Q07266 | 4.61E+07 | 9.26E+06 | 4.88E+06 | 2.01E+07 | 7.14E+06 | 3.02E+07 | 5.30E+06 | 1.42E+07 | 0.5  | 0.34  | 0.72 | 0.51 |
| DLGP2_RAT   | P97837 | 4.38E+07 | 4.79E+07 | 3.33E+07 | 4.17E+07 | 1.07E+07 | 5.25E+07 | 4.62E+07 | 3.65E+07 | 0.2  | 0.34  | 0.72 | 0.51 |
| PHB_RAT     | P67779 | 1.04E+08 | 4.83E+07 | 3.21E+07 | 6.15E+07 | 2.05E+07 | 7.40E+07 | 5.94E+07 | 5.13E+07 | 0.3  | 0.34  | 0.73 | 0.51 |
| SYT1_RAT    | P21707 | 4.03E+07 | 3.00E+07 | 3.85E+07 | 3.62E+07 | 3.52E+07 | 4.01E+07 | 3.73E+07 | 3.75E+07 | -0.1 | -0.33 | 0.73 | 0.51 |

Supplementary Table2

|             |        |          |          |          |          |          |          |          |          |      |       |      |      |
|-------------|--------|----------|----------|----------|----------|----------|----------|----------|----------|------|-------|------|------|
| PCLO_RAT    | Q9JKS6 | 6.07E+08 | 2.23E+08 | 1.66E+08 | 3.32E+08 | 6.58E+07 | 4.71E+08 | 2.57E+08 | 2.65E+08 | 0.3  | 0.33  | 0.73 | 0.51 |
| STX1B_RAT   | P61265 | 3.81E+07 | 2.22E+07 | 3.70E+07 | 3.24E+07 | 3.20E+07 | 5.83E+07 | 2.06E+07 | 3.70E+07 | -0.2 | -0.33 | 0.73 | 0.51 |
| GP158_MOUSE | Q8C419 | 4.40E+06 | 2.24E+07 | 9.57E+06 | 1.21E+07 | 2.38E+06 | 1.42E+07 | 3.05E+07 | 1.57E+07 | -0.4 | -0.33 | 0.74 | 0.50 |
| ADA23_MOUSE | Q9R1V7 | 8.58E+06 | 2.01E+06 | 2.83E+06 | 4.47E+06 | 3.02E+06 | 4.22E+06 | 3.95E+06 | 3.73E+06 | 0.3  | 0.32  | 0.74 | 0.50 |
| OPALI_HUMAN | Q96PE5 | 7.09E+05 | 1.88E+06 | 1.40E+06 | 1.33E+06 | 6.47E+05 | 1.41E+06 | 2.62E+06 | 1.56E+06 | -0.2 | -0.31 | 0.75 | 0.50 |
| SHAN3_RAT   | Q9JLU4 | 7.01E+07 | 5.17E+07 | 5.04E+07 | 5.74E+07 | 2.65E+07 | 4.96E+07 | 7.89E+07 | 5.17E+07 | 0.2  | 0.31  | 0.75 | 0.50 |
| KCNA3_RAT   | P15384 | 1.21E+07 | 2.24E+07 | 4.87E+06 | 1.31E+07 | 3.28E+06 | 1.67E+07 | 1.27E+07 | 1.09E+07 | 0.3  | 0.31  | 0.75 | 0.50 |
| SPA2L_MOUSE | Q8BNN1 | 7.17E+05 | 1.30E+06 | 4.55E+05 | 8.23E+05 | 4.32E+05 | 9.32E+05 | 1.51E+06 | 9.58E+05 | -0.2 | -0.31 | 0.75 | 0.49 |
| OGT1_MOUSE  | Q8CGY8 | 8.26E+05 | 3.64E+06 | 1.18E+05 | 1.53E+06 | 6.19E+04 | 5.68E+06 | 9.19E+05 | 2.22E+06 | -0.5 | -0.30 | 0.75 | 0.49 |
| GNAI1_RAT   | P10824 | 4.00E+08 | 3.32E+08 | 2.88E+08 | 3.40E+08 | 2.57E+08 | 3.70E+08 | 4.61E+08 | 3.62E+08 | -0.1 | -0.30 | 0.75 | 0.49 |
| SEPT2_RAT   | Q91Y81 | 2.95E+07 | 1.28E+07 | 5.81E+07 | 3.35E+07 | 1.07E+06 | 1.74E+07 | 5.99E+07 | 2.61E+07 | 0.4  | 0.30  | 0.75 | 0.49 |
| HXK1_RAT    | P05708 | 2.78E+09 | 1.22E+09 | 1.14E+09 | 1.71E+09 | 6.84E+08 | 1.59E+09 | 2.19E+09 | 1.49E+09 | 0.2  | 0.30  | 0.76 | 0.49 |
| GRM7_RAT    | P35400 | 8.11E+05 | 2.53E+07 | 5.62E+05 | 8.89E+06 | 7.09E+05 | 1.45E+06 | 1.52E+07 | 5.80E+06 | 0.6  | 0.29  | 0.76 | 0.49 |
| NMDZ1_RAT   | P35439 | 1.82E+08 | 5.87E+07 | 4.74E+07 | 9.59E+07 | 3.61E+07 | 1.27E+08 | 1.84E+08 | 1.16E+08 | -0.3 | -0.29 | 0.76 | 0.49 |
| BASP_RAT    | Q05175 | 1.55E+09 | 9.76E+08 | 1.35E+09 | 1.29E+09 | 7.05E+08 | 1.36E+09 | 1.52E+09 | 1.20E+09 | 0.1  | 0.29  | 0.76 | 0.49 |
| ATAD3_RAT   | Q3KRE0 | 8.05E+06 | 1.19E+08 | 4.04E+06 | 4.39E+07 | 1.75E+07 | 9.35E+07 | 6.26E+07 | 5.79E+07 | -0.4 | -0.29 | 0.77 | 0.49 |
| PACS1_RAT   | O88588 | 1.15E+07 | 3.70E+06 | 3.51E+06 | 6.24E+06 | 4.62E+06 | 1.33E+07 | 4.55E+06 | 7.49E+06 | -0.3 | -0.29 | 0.77 | 0.49 |
| CAD13_MOUSE | Q9WTR5 | 1.54E+06 | 6.17E+06 | 3.44E+05 | 2.68E+06 | 2.02E+06 | 5.43E+06 | 2.56E+06 | 3.34E+06 | -0.3 | -0.29 | 0.77 | 0.49 |
| CTND2_MOUSE | O35927 | 2.49E+07 | 9.82E+06 | 9.70E+06 | 1.48E+07 | 7.07E+06 | 1.60E+07 | 2.90E+07 | 1.74E+07 | -0.2 | -0.28 | 0.77 | 0.48 |
| CYFP2_MOUSE | Q5SQX6 | 4.91E+07 | 4.66E+07 | 7.89E+07 | 5.82E+07 | 4.21E+07 | 7.67E+07 | 6.95E+07 | 6.28E+07 | -0.1 | -0.28 | 0.77 | 0.48 |
| MYL6_RAT    | Q64119 | 6.92E+07 | 9.98E+07 | 3.59E+08 | 1.76E+08 | 1.17E+08 | 1.28E+08 | 4.04E+08 | 2.16E+08 | -0.3 | -0.28 | 0.77 | 0.48 |
| OPA1_RAT    | Q2TA68 | 2.52E+08 | 1.08E+08 | 4.95E+07 | 1.36E+08 | 3.42E+07 | 1.99E+08 | 2.60E+08 | 1.64E+08 | -0.3 | -0.28 | 0.77 | 0.48 |
| LPPR4_RAT   | Q7TMB7 | 2.86E+07 | 1.69E+07 | 8.60E+06 | 1.80E+07 | 1.69E+07 | 1.03E+07 | 2.09E+07 | 1.60E+07 | 0.2  | 0.27  | 0.78 | 0.48 |
| COF1_RAT    | P45592 | 3.38E+07 | 8.55E+07 | 5.67E+07 | 5.87E+07 | 5.39E+07 | 7.37E+07 | 6.29E+07 | 6.35E+07 | -0.1 | -0.27 | 0.78 | 0.48 |
| AP2A1_MOUSE | P17426 | 1.96E+08 | 7.20E+07 | 7.42E+07 | 1.14E+08 | 8.30E+07 | 7.46E+07 | 1.43E+08 | 1.00E+08 | 0.2  | 0.27  | 0.78 | 0.48 |
| IQEC3_RAT   | Q76M68 | 3.92E+06 | 1.82E+07 | 5.17E+06 | 9.09E+06 | 9.06E+06 | 1.49E+07 | 7.82E+06 | 1.06E+07 | -0.2 | -0.27 | 0.78 | 0.48 |
| SNP25_RAT   | P60881 | 2.37E+07 | 2.99E+07 | 3.27E+07 | 2.87E+07 | 2.72E+07 | 2.83E+07 | 3.37E+07 | 2.97E+07 | 0.0  | -0.27 | 0.78 | 0.48 |
| OMGP_MOUSE  | Q63912 | 2.45E+08 | 5.41E+07 | 1.27E+08 | 1.42E+08 | 9.70E+07 | 2.67E+08 | 1.30E+08 | 1.64E+08 | -0.2 | -0.27 | 0.78 | 0.48 |
| TAU_MOUSE   | P10637 | 9.32E+07 | 2.29E+08 | 5.40E+07 | 1.25E+08 | 1.33E+08 | 9.25E+07 | 1.03E+08 | 1.09E+08 | 0.2  | 0.26  | 0.78 | 0.48 |
| NCAM1_RAT   | P13596 | 4.60E+07 | 3.10E+07 | 2.63E+07 | 3.45E+07 | 1.41E+07 | 2.97E+07 | 4.93E+07 | 3.10E+07 | 0.2  | 0.26  | 0.79 | 0.48 |
| DYL1_RAT    | P63170 | 6.66E+07 | 2.34E+07 | 6.53E+07 | 5.18E+07 | 3.63E+05 | 8.75E+07 | 4.22E+07 | 4.34E+07 | 0.3  | 0.26  | 0.79 | 0.48 |
| TBB2A_RAT   | P85108 | 6.77E+09 | 7.63E+09 | 5.02E+09 | 6.47E+09 | 5.64E+09 | 8.00E+09 | 6.69E+09 | 6.77E+09 | -0.1 | -0.26 | 0.79 | 0.48 |
| UN13A_MOUSE | Q4KUS2 | 8.78E+07 | 7.01E+07 | 3.46E+07 | 6.41E+07 | 4.47E+07 | 7.82E+07 | 8.73E+07 | 7.00E+07 | -0.1 | -0.26 | 0.79 | 0.48 |
| GLNA_RAT    | P09606 | 1.77E+08 | 8.77E+07 | 9.17E+07 | 1.19E+08 | 4.27E+07 | 1.69E+08 | 1.92E+08 | 1.34E+08 | -0.2 | -0.26 | 0.79 | 0.48 |
| PRIO_MOUSE  | P04925 | 1.12E+08 | 7.92E+07 | 9.65E+07 | 9.61E+07 | 3.50E+07 | 1.09E+08 | 1.20E+08 | 8.80E+07 | 0.1  | 0.26  | 0.79 | 0.47 |
| MACF1_HUMAN | Q9UPN3 | 1.30E+06 | 6.70E+06 | 2.67E+06 | 3.56E+06 | 2.77E+06 | 1.55E+05 | 5.81E+06 | 2.91E+06 | 0.3  | 0.25  | 0.79 | 0.47 |
| KCNA2_RAT   | P63142 | 1.21E+07 | 2.28E+07 | 4.87E+06 | 1.32E+07 | 3.28E+06 | 1.67E+07 | 1.42E+07 | 1.14E+07 | 0.2  | 0.25  | 0.79 | 0.47 |
| GABR2_RAT   | O88871 | 5.68E+07 | 1.71E+07 | 7.69E+06 | 2.72E+07 | 1.86E+05 | 4.72E+07 | 1.73E+07 | 2.16E+07 | 0.3  | 0.25  | 0.80 | 0.47 |
| KCD12_MOUSE | Q6WVG3 | 1.36E+08 | 7.50E+07 | 5.67E+07 | 8.93E+07 | 3.10E+07 | 1.36E+08 | 1.35E+08 | 1.01E+08 | -0.2 | -0.25 | 0.80 | 0.47 |
| PP2BB_RAT   | P20651 | 1.96E+07 | 4.17E+07 | 1.61E+07 | 2.58E+07 | 1.73E+07 | 4.60E+07 | 2.38E+07 | 2.90E+07 | -0.2 | -0.24 | 0.80 | 0.47 |
| NDUA8_MOUSE | Q9DCJ5 | 4.61E+05 | 4.64E+06 | 1.59E+06 | 2.23E+06 | 2.50E+05 | 3.04E+06 | 2.19E+06 | 1.83E+06 | 0.3  | 0.24  | 0.80 | 0.47 |
| SHAN1_RAT   | Q9WV48 | 1.73E+08 | 1.34E+08 | 1.15E+08 | 1.41E+08 | 8.65E+07 | 1.62E+08 | 2.03E+08 | 1.51E+08 | -0.1 | -0.24 | 0.81 | 0.46 |
| CSPG2_RAT   | Q9ERB4 | 2.92E+07 | 3.85E+07 | 5.57E+07 | 4.12E+07 | 3.02E+07 | 6.10E+07 | 4.15E+07 | 4.42E+07 | -0.1 | -0.23 | 0.81 | 0.46 |
| FLOT1_RAT   | Q9Z1E1 | 9.24E+07 | 4.35E+07 | 5.96E+07 | 6.52E+07 | 1.40E+07 | 7.55E+07 | 8.55E+07 | 5.84E+07 | 0.2  | 0.23  | 0.81 | 0.46 |
| VATH_MOUSE  | Q8BVE3 | 4.77E+07 | 2.19E+07 | 4.39E+07 | 3.78E+07 | 1.51E+07 | 3.81E+07 | 5.03E+07 | 3.45E+07 | 0.1  | 0.23  | 0.81 | 0.46 |

Supplementary Table2

|             |        |          |          |          |          |          |          |          |          |      |       |      |      |
|-------------|--------|----------|----------|----------|----------|----------|----------|----------|----------|------|-------|------|------|
| SEPT5_MOUSE | Q922Q6 | 1.36E+08 | 7.37E+07 | 1.07E+08 | 1.06E+08 | 6.59E+07 | 1.25E+08 | 1.08E+08 | 9.95E+07 | 0.1  | 0.23  | 0.82 | 0.46 |
| RGS17_MOUSE | Q9QZB0 | 1.63E+07 | 1.29E+07 | 3.20E+06 | 1.08E+07 | 8.74E+06 | 8.60E+06 | 1.20E+07 | 9.78E+06 | 0.1  | 0.22  | 0.82 | 0.46 |
| G3P_RAT     | P04797 | 9.56E+08 | 6.50E+08 | 4.90E+08 | 6.99E+08 | 5.18E+08 | 5.61E+08 | 1.21E+09 | 7.63E+08 | -0.1 | -0.22 | 0.82 | 0.46 |
| H4_RAT      | P62804 | 5.70E+07 | 1.19E+08 | 2.20E+08 | 1.32E+08 | 1.44E+08 | 1.21E+08 | 9.52E+07 | 1.20E+08 | 0.1  | 0.22  | 0.82 | 0.46 |
| ODO1_RAT    | Q5XI78 | 3.01E+07 | 6.13E+06 | 3.79E+06 | 1.34E+07 | 3.54E+05 | 2.29E+07 | 9.03E+06 | 1.08E+07 | 0.3  | 0.22  | 0.82 | 0.46 |
| KCC2D_RAT   | P15791 | 1.79E+09 | 2.33E+09 | 1.25E+09 | 1.79E+09 | 1.30E+09 | 2.02E+09 | 2.35E+09 | 1.89E+09 | -0.1 | -0.21 | 0.83 | 0.46 |
| BSN_RAT     | O88778 | 1.47E+09 | 1.17E+09 | 9.74E+08 | 1.20E+09 | 7.84E+08 | 1.41E+09 | 1.61E+09 | 1.27E+09 | -0.1 | -0.21 | 0.83 | 0.45 |
| CXA1_RAT    | P08050 | 3.17E+08 | 1.23E+08 | 2.70E+08 | 2.36E+08 | 9.63E+07 | 3.41E+08 | 3.40E+08 | 2.59E+08 | -0.1 | -0.21 | 0.83 | 0.45 |
| KCC2G_RAT   | P11730 | 1.44E+09 | 2.23E+09 | 1.19E+09 | 1.62E+09 | 1.30E+09 | 1.89E+09 | 1.92E+09 | 1.70E+09 | -0.1 | -0.20 | 0.84 | 0.45 |
| CALM_RAT    | P62161 | 1.54E+08 | 5.75E+07 | 1.33E+08 | 1.15E+08 | 7.21E+07 | 1.60E+08 | 1.39E+08 | 1.24E+08 | -0.1 | -0.20 | 0.84 | 0.45 |
| ANK2_MOUSE  | Q8C8R3 | 8.28E+08 | 7.05E+08 | 7.36E+08 | 7.56E+08 | 4.88E+08 | 8.78E+08 | 8.24E+08 | 7.30E+08 | 0.1  | 0.19  | 0.85 | 0.45 |
| CA2D1_RAT   | P54290 | 4.28E+06 | 3.89E+06 | 1.41E+06 | 3.19E+06 | 2.64E+05 | 1.97E+06 | 6.15E+06 | 2.79E+06 | 0.2  | 0.19  | 0.85 | 0.44 |
| HSP7C_RAT   | P63018 | 1.44E+09 | 8.69E+08 | 7.33E+08 | 1.01E+09 | 7.31E+08 | 1.07E+09 | 1.42E+09 | 1.07E+09 | -0.1 | -0.18 | 0.85 | 0.44 |
| TOM7A_RAT   | Q75Q39 | 3.37E+08 | 3.38E+08 | 1.12E+08 | 2.63E+08 | 3.14E+08 | 2.10E+08 | 2.16E+08 | 2.47E+08 | 0.1  | 0.18  | 0.86 | 0.44 |
| CAZA1_RAT   | B2GUZ5 | 7.08E+07 | 7.07E+07 | 4.40E+07 | 6.19E+07 | 4.96E+07 | 8.32E+07 | 6.05E+07 | 6.44E+07 | -0.1 | -0.17 | 0.86 | 0.44 |
| ODO2_RAT    | Q01205 | 1.11E+07 | 1.74E+07 | 2.60E+07 | 1.82E+07 | 8.61E+06 | 2.59E+07 | 2.41E+07 | 1.95E+07 | -0.1 | -0.17 | 0.86 | 0.44 |
| CAZA2_RAT   | Q3T1K5 | 1.20E+08 | 1.51E+08 | 9.21E+07 | 1.21E+08 | 7.56E+07 | 1.44E+08 | 1.60E+08 | 1.27E+08 | -0.1 | -0.17 | 0.86 | 0.44 |
| SPTN2_RAT   | Q9QWN8 | 3.84E+08 | 6.08E+08 | 4.35E+08 | 4.76E+08 | 2.59E+08 | 6.05E+08 | 4.94E+08 | 4.52E+08 | 0.1  | 0.17  | 0.86 | 0.44 |
| CH60_RAT    | P63039 | 2.94E+07 | 1.56E+06 | 2.23E+06 | 1.11E+07 | 1.33E+06 | 6.15E+06 | 3.32E+07 | 1.36E+07 | -0.3 | -0.17 | 0.86 | 0.44 |
| PLEC1_RAT   | P30427 | 1.84E+08 | 3.98E+07 | 7.31E+07 | 9.91E+07 | 2.79E+07 | 1.13E+08 | 1.27E+08 | 8.93E+07 | 0.2  | 0.17  | 0.86 | 0.44 |
| GSK3B_RAT   | P18266 | 4.28E+06 | 5.39E+06 | 2.83E+06 | 4.17E+06 | 2.29E+06 | 4.87E+06 | 4.75E+06 | 3.97E+06 | 0.1  | 0.16  | 0.87 | 0.43 |
| GRIA3_MOUSE | Q922W9 | 6.06E+07 | 2.52E+07 | 3.16E+07 | 3.91E+07 | 1.16E+07 | 6.15E+07 | 5.34E+07 | 4.22E+07 | -0.1 | -0.15 | 0.88 | 0.43 |
| RS10_RAT    | P63326 | 6.97E+06 | 3.15E+06 | 3.22E+06 | 4.45E+06 | 6.99E+05 | 7.78E+06 | 6.04E+06 | 4.84E+06 | -0.1 | -0.14 | 0.88 | 0.43 |
| MTX2_MOUSE  | O88441 | 1.08E+07 | 4.39E+06 | 1.91E+06 | 5.69E+06 | 1.11E+06 | 5.64E+06 | 8.70E+06 | 5.15E+06 | 0.1  | 0.14  | 0.88 | 0.43 |
| GIT1_RAT    | Q92272 | 9.33E+06 | 7.14E+06 | 3.91E+06 | 6.79E+06 | 2.71E+06 | 1.26E+07 | 6.61E+06 | 7.30E+06 | -0.1 | -0.14 | 0.88 | 0.43 |
| LRRC7_RAT   | P70587 | 1.57E+09 | 2.06E+08 | 7.17E+08 | 8.31E+08 | 6.42E+08 | 8.19E+08 | 8.46E+08 | 7.69E+08 | 0.1  | 0.14  | 0.88 | 0.43 |
| KAP3_RAT    | P12369 | 1.37E+07 | 1.12E+07 | 1.05E+07 | 1.18E+07 | 6.67E+06 | 1.28E+07 | 1.48E+07 | 1.14E+07 | 0.0  | 0.14  | 0.89 | 0.43 |
| KAPCA_RAT   | P27791 | 5.79E+07 | 4.77E+06 | 2.55E+06 | 2.18E+07 | 3.08E+06 | 4.00E+07 | 3.18E+07 | 2.49E+07 | -0.2 | -0.14 | 0.89 | 0.42 |
| IQEC1_MOUSE | Q8R0S2 | 4.39E+07 | 5.75E+07 | 2.62E+07 | 4.25E+07 | 2.49E+07 | 6.55E+07 | 3.04E+07 | 4.03E+07 | 0.1  | 0.13  | 0.89 | 0.42 |
| GD1L1_MOUSE | Q8VE33 | 1.07E+07 | 2.21E+06 | 1.32E+07 | 8.68E+06 | 4.54E+06 | 1.08E+07 | 9.09E+06 | 8.16E+06 | 0.1  | 0.13  | 0.90 | 0.42 |
| MTCH1_MOUSE | Q791T5 | 7.26E+07 | 2.81E+07 | 3.31E+07 | 4.46E+07 | 1.76E+06 | 6.67E+07 | 7.63E+07 | 4.83E+07 | -0.1 | -0.12 | 0.90 | 0.42 |
| MAP1B_RAT   | P15205 | 3.96E+08 | 2.58E+08 | 2.89E+08 | 3.14E+08 | 2.45E+08 | 3.43E+08 | 3.34E+08 | 3.07E+08 | 0.0  | 0.12  | 0.90 | 0.42 |
| RUFY3_RAT   | Q5FVJ0 | 8.28E+05 | 8.63E+05 | 3.17E+05 | 6.69E+05 | 1.97E+05 | 7.95E+05 | 9.12E+05 | 6.35E+05 | 0.1  | 0.11  | 0.91 | 0.42 |
| NMDE1_RAT   | Q00959 | 2.80E+07 | 2.69E+07 | 1.35E+07 | 2.28E+07 | 6.26E+06 | 2.65E+07 | 3.23E+07 | 2.17E+07 | 0.1  | 0.11  | 0.91 | 0.41 |
| CNTN1_RAT   | Q63198 | 1.90E+09 | 1.16E+09 | 1.59E+09 | 1.55E+09 | 1.02E+09 | 1.84E+09 | 1.92E+09 | 1.59E+09 | 0.0  | -0.11 | 0.91 | 0.41 |
| KCAB2_RAT   | P62483 | 1.28E+07 | 3.95E+06 | 4.25E+06 | 6.99E+06 | 8.48E+05 | 1.11E+07 | 1.05E+07 | 7.48E+06 | -0.1 | -0.10 | 0.92 | 0.41 |
| GRIA4_HUMAN | P48058 | 6.79E+07 | 2.31E+07 | 2.91E+07 | 4.00E+07 | 8.10E+06 | 6.55E+07 | 5.39E+07 | 4.25E+07 | -0.1 | -0.10 | 0.92 | 0.41 |
| KCC2B_MOUSE | P28652 | 2.24E+09 | 3.35E+09 | 1.55E+09 | 2.38E+09 | 1.57E+09 | 2.50E+09 | 3.31E+09 | 2.46E+09 | 0.0  | -0.10 | 0.92 | 0.41 |
| RPGF2_MOUSE | Q8CHG7 | 9.72E+05 | 1.49E+06 | 1.21E+05 | 8.60E+05 | 1.21E+05 | 2.30E+06 | 4.13E+05 | 9.46E+05 | -0.1 | -0.10 | 0.92 | 0.41 |
| ECHA_RAT    | Q64428 | 4.94E+07 | 3.23E+07 | 2.58E+07 | 3.58E+07 | 1.72E+07 | 4.00E+07 | 4.66E+07 | 3.46E+07 | 0.0  | 0.10  | 0.92 | 0.41 |
| PSD3_MOUSE  | Q2PFD7 | 7.26E+06 | 9.64E+06 | 8.83E+06 | 8.58E+06 | 2.23E+06 | 1.07E+07 | 1.18E+07 | 8.25E+06 | 0.1  | 0.10  | 0.92 | 0.41 |
| RAC1_RAT    | Q6RUV5 | 4.47E+08 | 4.00E+08 | 4.08E+08 | 4.18E+08 | 2.24E+08 | 4.43E+08 | 5.58E+08 | 4.08E+08 | 0.0  | 0.09  | 0.92 | 0.41 |
| VDAC3_RAT   | Q9R1Z0 | 2.42E+09 | 1.09E+09 | 8.94E+08 | 1.47E+09 | 7.36E+08 | 1.46E+09 | 2.02E+09 | 1.40E+09 | 0.1  | 0.09  | 0.92 | 0.41 |
| BASP_MOUSE  | Q91XV3 | 2.13E+08 | 7.78E+07 | 6.39E+08 | 3.10E+08 | 2.47E+08 | 3.99E+08 | 2.31E+08 | 2.92E+08 | 0.1  | 0.09  | 0.93 | 0.41 |
| SPTB2_MOUSE | Q62261 | 2.09E+09 | 1.19E+09 | 1.21E+09 | 1.50E+09 | 8.43E+08 | 1.71E+09 | 1.82E+09 | 1.46E+09 | 0.0  | 0.09  | 0.93 | 0.41 |

Supplementary Table2



Supplementary Table2

|             |        |          |          |          |          |          |          |          |          |     |       |      |      |
|-------------|--------|----------|----------|----------|----------|----------|----------|----------|----------|-----|-------|------|------|
| STXB1_RAT   | P61765 | 4.12E+08 | 5.18E+06 | 3.53E+07 | 1.51E+08 | 2.82E+07 | 3.00E+07 | 3.51E+08 | 1.36E+08 | 0.1 | 0.08  | 0.94 | 0.40 |
| ACTB_RAT    | P60711 | 6.90E+09 | 1.18E+10 | 7.58E+09 | 8.75E+09 | 5.52E+09 | 1.02E+10 | 9.98E+09 | 8.57E+09 | 0.0 | 0.08  | 0.94 | 0.40 |
| NDUA4_MOUSE | Q62425 | 1.20E+08 | 2.72E+08 | 8.03E+07 | 1.57E+08 | 1.35E+08 | 1.73E+08 | 1.78E+08 | 1.62E+08 | 0.0 | -0.07 | 0.94 | 0.40 |
| MYOSA_RAT   | Q9QYF3 | 1.98E+08 | 4.12E+08 | 1.93E+08 | 2.67E+08 | 1.78E+08 | 4.26E+08 | 2.23E+08 | 2.76E+08 | 0.0 | -0.07 | 0.94 | 0.40 |
| PP1B_RAT    | P62142 | 3.20E+07 | 6.62E+06 | 1.73E+06 | 1.35E+07 | 1.53E+05 | 1.17E+07 | 2.59E+07 | 1.26E+07 | 0.1 | 0.07  | 0.95 | 0.40 |
| COX41_RAT   | P10888 | 5.32E+07 | 1.33E+08 | 8.89E+07 | 9.17E+07 | 2.91E+07 | 1.24E+08 | 1.14E+08 | 8.90E+07 | 0.0 | 0.06  | 0.95 | 0.40 |
| CD47_RAT    | P97829 | 5.90E+07 | 3.90E+07 | 2.85E+07 | 4.22E+07 | 2.31E+07 | 3.52E+07 | 7.13E+07 | 4.32E+07 | 0.0 | -0.06 | 0.95 | 0.39 |
| CMC1_MOUSE  | Q8BH59 | 7.67E+07 | 4.83E+07 | 3.51E+07 | 5.33E+07 | 5.24E+07 | 4.36E+07 | 6.64E+07 | 5.41E+07 | 0.0 | -0.05 | 0.96 | 0.39 |
| ADDA_RAT    | Q63028 | 7.55E+07 | 1.10E+08 | 9.98E+07 | 9.51E+07 | 2.93E+07 | 9.74E+07 | 1.65E+08 | 9.73E+07 | 0.0 | -0.05 | 0.96 | 0.39 |
| VDAC2_RAT   | P81155 | 4.15E+09 | 2.10E+09 | 1.47E+09 | 2.58E+09 | 1.55E+09 | 2.70E+09 | 3.65E+09 | 2.63E+09 | 0.0 | -0.05 | 0.96 | 0.39 |
| SYGP1_RAT   | Q9QUH6 | 1.75E+09 | 1.23E+09 | 9.95E+08 | 1.32E+09 | 8.12E+08 | 1.40E+09 | 1.71E+09 | 1.31E+09 | 0.0 | 0.04  | 0.96 | 0.39 |
| KCC2A_RAT   | P11275 | 4.07E+09 | 4.45E+09 | 2.36E+09 | 3.63E+09 | 2.40E+09 | 3.89E+09 | 4.46E+09 | 3.59E+09 | 0.0 | 0.04  | 0.96 | 0.39 |
| SYN3_RAT    | O70441 | 3.48E+07 | 2.67E+07 | 1.14E+07 | 2.43E+07 | 1.93E+07 | 2.57E+07 | 2.70E+07 | 2.40E+07 | 0.0 | 0.04  | 0.97 | 0.39 |
| LY6H_MOUSE  | Q9WUC3 | 8.16E+06 | 5.30E+07 | 7.51E+07 | 4.54E+07 | 2.21E+07 | 5.08E+07 | 6.64E+07 | 4.64E+07 | 0.0 | -0.04 | 0.97 | 0.39 |
| GRIA1_RAT   | P19490 | 1.69E+08 | 9.79E+07 | 7.40E+07 | 1.13E+08 | 5.22E+07 | 1.46E+08 | 1.47E+08 | 1.15E+08 | 0.0 | -0.04 | 0.97 | 0.39 |
| SYNPO_RAT   | Q9Z327 | 1.81E+07 | 3.14E+06 | 1.47E+06 | 7.58E+06 | 3.32E+06 | 1.61E+07 | 2.52E+06 | 7.31E+06 | 0.1 | 0.04  | 0.97 | 0.39 |
| A26CB_HUMAN | A5A3E0 | 2.67E+09 | 1.24E+09 | 1.34E+09 | 1.75E+09 | 1.14E+09 | 1.82E+09 | 2.36E+09 | 1.77E+09 | 0.0 | -0.03 | 0.97 | 0.39 |
| HS12A_HUMAN | O43301 | 4.51E+05 | 2.33E+06 | 1.04E+06 | 1.27E+06 | 3.08E+04 | 1.81E+06 | 1.90E+06 | 1.25E+06 | 0.0 | 0.03  | 0.98 | 0.38 |
| GNAZ_RAT    | P19627 | 1.51E+08 | 1.16E+08 | 6.84E+07 | 1.12E+08 | 8.83E+07 | 1.30E+08 | 1.15E+08 | 1.11E+08 | 0.0 | 0.02  | 0.98 | 0.38 |
| KCRU_RAT    | P25809 | 8.84E+08 | 4.86E+08 | 3.90E+08 | 5.87E+08 | 3.49E+08 | 7.20E+08 | 7.03E+08 | 5.91E+08 | 0.0 | -0.02 | 0.98 | 0.38 |
| THIL_RAT    | P17764 | 3.00E+08 | 8.53E+07 | 8.04E+07 | 1.55E+08 | 5.58E+07 | 2.07E+08 | 2.00E+08 | 1.54E+08 | 0.0 | 0.01  | 0.99 | 0.38 |
| MYH14_MOUSE | Q6URW6 | 1.87E+06 | 7.89E+06 | 8.13E+05 | 3.52E+06 | 3.51E+06 | 2.03E+06 | 5.14E+06 | 3.56E+06 | 0.0 | -0.01 | 0.99 | 0.38 |
| AP2M1_RAT   | P84092 | 1.06E+08 | 6.40E+07 | 5.55E+07 | 7.52E+07 | 6.04E+07 | 5.84E+07 | 1.08E+08 | 7.55E+07 | 0.0 | -0.01 | 0.99 | 0.38 |
| WASF1_RAT   | Q5BJU7 | 2.62E+07 | 3.04E+07 | 2.55E+07 | 2.74E+07 | 6.82E+06 | 3.20E+07 | 4.30E+07 | 2.73E+07 | 0.0 | 0.01  | 0.99 | 0.38 |

Supplementary Table 3

| Protein Name | Uniprot accession numbers | Valproate 1 (Sum Intensity) | Valproate 2 (Sum Intensity) | Valproate 3 (Sum Intensity) | Average Total Intensity (Valproate) | Control 1 (Sum Intensity) | Control 2 (Sum Intensity) | Control 3 (Sum Intensity) | Average Total Intensity (Control) | Log2 fold change Valproate/ Control | Effect size Valproate/ Control | t-test Valproate/ Control | p - value Valproate / control |
|--------------|---------------------------|-----------------------------|-----------------------------|-----------------------------|-------------------------------------|---------------------------|---------------------------|---------------------------|-----------------------------------|-------------------------------------|--------------------------------|---------------------------|-------------------------------|
| VATB2_RAT    | P62815                    | 1.43E+09                    | 1.57E+09                    | 1.67E+09                    | 1.56E+09                            | 7.74E+08                  | 6.85E+08                  | 9.12E+08                  | 7.91E+08                          | 1.0                                 | 1.77                           | 0.00                      | 1.00                          |
| NOE1_RAT     | Q62609                    | 2.26E+06                    | 8.70E+06                    | 8.18E+06                    | 6.38E+06                            | 2.74E+07                  | 3.70E+07                  | 3.26E+07                  | 3.23E+07                          | -2.3                                | -1.76                          | 0.00                      | 1.00                          |
| HS12A_HUMAN  | O43301                    | 5.31E+06                    | 5.16E+06                    | 4.41E+06                    | 4.96E+06                            | 3.08E+04                  | 1.81E+06                  | 1.90E+06                  | 1.25E+06                          | 2.0                                 | 1.72                           | 0.01                      | 1.00                          |
| DPYL2_RAT    | P47942                    | 9.07E+08                    | 1.26E+09                    | 9.88E+08                    | 1.05E+09                            | 4.29E+08                  | 4.89E+08                  | 4.71E+08                  | 4.63E+08                          | 1.2                                 | 1.72                           | 0.01                      | 1.00                          |
| MAP2_RAT     | P15146                    | 6.02E+07                    | 6.84E+07                    | 3.94E+07                    | 5.60E+07                            | 8.78E+06                  | 1.18E+07                  | 7.90E+06                  | 9.48E+06                          | 2.6                                 | 1.71                           | 0.01                      | 1.00                          |
| NAC2_RAT     | P48768                    | 1.94E+07                    | 1.38E+07                    | 1.36E+07                    | 1.56E+07                            | 6.45E+06                  | 8.82E+06                  | 6.93E+06                  | 7.40E+06                          | 1.1                                 | 1.64                           | 0.02                      | 0.99                          |
| SYT1_RAT     | P21707                    | 5.45E+07                    | 8.04E+07                    | 6.59E+07                    | 6.69E+07                            | 3.52E+07                  | 4.01E+07                  | 3.73E+07                  | 3.75E+07                          | 0.8                                 | 1.62                           | 0.02                      | 0.99                          |
| PP2BA_RAT    | P63329                    | 8.69E+07                    | 9.77E+07                    | 8.25E+07                    | 8.90E+07                            | 1.28E+08                  | 1.08E+08                  | 1.36E+08                  | 1.24E+08                          | -0.5                                | -1.61                          | 0.02                      | 0.99                          |
| AINX_RAT     | P23565                    | 1.51E+09                    | 1.21E+09                    | 1.23E+09                    | 1.32E+09                            | 7.51E+08                  | 9.69E+08                  | 9.21E+08                  | 8.80E+08                          | 0.6                                 | 1.61                           | 0.02                      | 0.99                          |
| NLGN2_RAT    | Q62888                    | 8.19E+05                    | 3.82E+05                    | 1.04E+05                    | 4.35E+05                            | 1.19E+06                  | 2.02E+06                  | 2.15E+06                  | 1.79E+06                          | -2.0                                | -1.61                          | 0.02                      | 0.98                          |
| ADA23_MOUSE  | Q9R1V7                    | 1.17E+07                    | 1.12E+07                    | 6.61E+06                    | 9.82E+06                            | 3.02E+06                  | 4.22E+06                  | 3.95E+06                  | 3.73E+06                          | 1.4                                 | 1.60                           | 0.02                      | 0.98                          |
| ANS1B_RAT    | P0C6S7                    | 1.50E+08                    | 1.48E+08                    | 1.73E+08                    | 1.57E+08                            | 2.98E+08                  | 2.06E+08                  | 2.61E+08                  | 2.55E+08                          | -0.7                                | -1.59                          | 0.02                      | 0.98                          |
| TAU_MOUSE    | P10637                    | 1.90E+08                    | 1.65E+08                    | 1.47E+08                    | 1.68E+08                            | 1.33E+08                  | 9.25E+07                  | 1.03E+08                  | 1.09E+08                          | 0.6                                 | 1.57                           | 0.03                      | 0.98                          |
| TBB2A_RAT    | P85108                    | 8.72E+09                    | 1.15E+10                    | 1.05E+10                    | 1.02E+10                            | 5.64E+09                  | 8.00E+09                  | 6.69E+09                  | 6.77E+09                          | 0.6                                 | 1.56                           | 0.03                      | 0.98                          |
| RUFY3_RAT    | Q5FVJ0                    | 1.47E+06                    | 1.59E+06                    | 1.23E+06                    | 1.43E+06                            | 1.97E+05                  | 7.95E+05                  | 9.12E+05                  | 6.35E+05                          | 1.2                                 | 1.55                           | 0.03                      | 0.98                          |
| SNP25_RAT    | P60881                    | 5.33E+07                    | 6.34E+07                    | 4.02E+07                    | 5.23E+07                            | 2.72E+07                  | 2.83E+07                  | 3.37E+07                  | 2.97E+07                          | 0.8                                 | 1.55                           | 0.03                      | 0.98                          |
| DYHC1_RAT    | P38650                    | 1.29E+08                    | 1.22E+08                    | 8.91E+07                    | 1.13E+08                            | 4.45E+07                  | 8.00E+07                  | 2.82E+07                  | 5.09E+07                          | 1.2                                 | 1.55                           | 0.03                      | 0.97                          |
| SHLB2_RAT    | Q5PPJ9                    | 3.07E+06                    | 2.56E+06                    | 1.04E+06                    | 2.22E+06                            | 3.19E+05                  | 3.03E+05                  | 2.39E+05                  | 2.87E+05                          | 3.0                                 | 1.54                           | 0.03                      | 0.97                          |
| COF1_RAT     | P45592                    | 1.29E+08                    | 9.36E+07                    | 1.62E+08                    | 1.28E+08                            | 5.39E+07                  | 7.37E+07                  | 6.29E+07                  | 6.35E+07                          | 1.0                                 | 1.54                           | 0.03                      | 0.97                          |
| EFTU_RAT     | P85834                    | 2.16E+07                    | 2.74E+07                    | 4.06E+07                    | 2.99E+07                            | 5.48E+07                  | 8.87E+07                  | 1.16E+08                  | 8.64E+07                          | -1.5                                | -1.53                          | 0.04                      | 0.97                          |
| NCDN_RAT     | O35095                    | 2.35E+07                    | 1.67E+07                    | 1.09E+07                    | 1.70E+07                            | 9.15E+05                  | 7.42E+06                  | 5.30E+06                  | 4.54E+06                          | 1.9                                 | 1.53                           | 0.04                      | 0.97                          |
| UN13A_MOUSE  | Q4KUS2                    | 2.55E+06                    | 2.65E+07                    | 3.44E+07                    | 2.11E+07                            | 4.47E+07                  | 7.82E+07                  | 8.73E+07                  | 7.00E+07                          | -1.7                                | -1.52                          | 0.04                      | 0.97                          |
| GRM2_RAT     | P31421                    | 1.45E+07                    | 1.35E+07                    | 1.50E+07                    | 1.44E+07                            | 2.34E+06                  | 1.03E+07                  | 8.49E+06                  | 7.03E+06                          | 1.0                                 | 1.52                           | 0.04                      | 0.97                          |
| MAP4_RAT     | Q5M7W5                    | 1.03E+08                    | 1.23E+08                    | 7.37E+07                    | 9.97E+07                            | 4.31E+07                  | 6.41E+07                  | 5.68E+07                  | 5.47E+07                          | 0.9                                 | 1.50                           | 0.04                      | 0.97                          |
| NSF_RAT      | Q9QUL6                    | 1.11E+09                    | 6.33E+08                    | 5.86E+08                    | 7.78E+08                            | 3.61E+08                  | 3.19E+08                  | 2.93E+08                  | 3.24E+08                          | 1.3                                 | 1.46                           | 0.06                      | 0.96                          |
| GRM3_RAT     | P31422                    | 1.18E+07                    | 1.32E+07                    | 1.20E+07                    | 1.23E+07                            | 3.35E+06                  | 9.50E+06                  | 8.53E+06                  | 7.13E+06                          | 0.8                                 | 1.46                           | 0.06                      | 0.96                          |
| EF1A1_RAT    | P62630                    | 1.75E+08                    | 2.32E+08                    | 2.04E+08                    | 2.04E+08                            | 1.61E+08                  | 1.64E+08                  | 1.26E+08                  | 1.50E+08                          | 0.4                                 | 1.45                           | 0.06                      | 0.96                          |
| ANK3_HUMAN   | Q12955                    | 2.06E+08                    | 1.55E+08                    | 1.48E+08                    | 1.70E+08                            | 4.90E+07                  | 1.26E+08                  | 1.07E+08                  | 9.40E+07                          | 0.9                                 | 1.44                           | 0.06                      | 0.95                          |
| ODO2_RAT     | Q01205                    | 6.15E+06                    | 5.66E+06                    | 5.25E+06                    | 5.69E+06                            | 8.61E+06                  | 2.59E+07                  | 2.41E+07                  | 1.95E+07                          | -1.8                                | -1.43                          | 0.07                      | 0.95                          |
| EF1A2_RAT    | P62632                    | 1.70E+08                    | 2.06E+08                    | 2.01E+08                    | 1.92E+08                            | 1.61E+08                  | 1.64E+08                  | 1.21E+08                  | 1.49E+08                          | 0.4                                 | 1.41                           | 0.07                      | 0.95                          |
| MAP6_RAT     | Q63560                    | 7.25E+08                    | 7.39E+08                    | 6.43E+08                    | 7.02E+08                            | 4.01E+08                  | 5.17E+08                  | 6.42E+08                  | 5.20E+08                          | 0.4                                 | 1.40                           | 0.07                      | 0.94                          |
| GEPH_HUMAN   | Q9NQX3                    | 3.42E+07                    | 2.63E+07                    | 2.76E+07                    | 2.94E+07                            | 9.85E+06                  | 2.57E+07                  | 1.65E+07                  | 1.73E+07                          | 0.8                                 | 1.38                           | 0.08                      | 0.94                          |
| 1433Z_RAT    | P63102                    | 1.26E+08                    | 2.79E+08                    | 2.49E+08                    | 2.18E+08                            | 3.60E+07                  | 1.12E+08                  | 1.30E+08                  | 9.26E+07                          | 1.2                                 | 1.37                           | 0.08                      | 0.94                          |
| IP3KA_RAT    | P17105                    | 6.04E+06                    | 7.09E+06                    | 1.89E+06                    | 5.00E+06                            | 9.68E+06                  | 1.02E+07                  | 1.94E+07                  | 1.31E+07                          | -1.4                                | -1.37                          | 0.08                      | 0.94                          |
| PROF2_RAT    | Q9EPC6                    | 4.95E+07                    | 8.96E+07                    | 4.30E+07                    | 6.07E+07                            | 2.55E+07                  | 2.44E+07                  | 3.20E+07                  | 2.73E+07                          | 1.2                                 | 1.37                           | 0.09                      | 0.94                          |
| 1433E_RAT    | P62260                    | 8.05E+07                    | 2.41E+08                    | 2.05E+08                    | 1.75E+08                            | 2.80E+07                  | 8.30E+07                  | 6.94E+07                  | 6.01E+07                          | 1.5                                 | 1.36                           | 0.09                      | 0.93                          |
| HBA_RAT      | P01946                    | 1.32E+06                    | 1.87E+06                    | 8.67E+05                    | 1.35E+06                            | 3.19E+06                  | 1.78E+06                  | 2.41E+06                  | 2.46E+06                          | -0.9                                | -1.35                          | 0.09                      | 0.93                          |
| NFL_RAT      | P19527                    | 7.25E+08                    | 5.41E+08                    | 4.89E+08                    | 5.85E+08                            | 3.79E+08                  | 3.39E+08                  | 4.85E+08                  | 4.01E+08                          | 0.5                                 | 1.35                           | 0.09                      | 0.93                          |
| PHAR1_RAT    | P62024                    | 3.58E+06                    | 2.16E+06                    | 2.10E+06                    | 2.61E+06                            | 1.09E+06                  | 1.30E+06                  | 1.92E+06                  | 1.44E+06                          | 0.9                                 | 1.34                           | 0.10                      | 0.93                          |
| KCC2G_RAT    | P11730                    | 2.30E+09                    | 2.03E+09                    | 2.18E+09                    | 2.17E+09                            | 1.30E+09                  | 1.89E+09                  | 1.92E+09                  | 1.70E+09                          | 0.3                                 | 1.34                           | 0.10                      | 0.93                          |
| PRDX1_RAT    | Q63716                    | 1.64E+07                    | 5.05E+07                    | 2.02E+07                    | 2.90E+07                            | 2.07E+06                  | 1.00E+07                  | 4.80E+06                  | 5.63E+06                          | 2.4                                 | 1.33                           | 0.10                      | 0.92                          |
| PSD3_MOUSE   | Q2PFD7                    | 1.26E+07                    | 1.99E+07                    | 3.15E+07                    | 2.13E+07                            | 2.23E+06                  | 1.07E+07                  | 1.18E+07                  | 8.25E+06                          | 1.4                                 | 1.32                           | 0.11                      | 0.92                          |

Supplementary Table 3

Supplementary Table 3

|             |        |          |          |          |          |          |          |          |          |      |       |      |      |
|-------------|--------|----------|----------|----------|----------|----------|----------|----------|----------|------|-------|------|------|
| 1433T_RAT   | P68255 | 4.75E+07 | 1.89E+08 | 1.80E+08 | 1.39E+08 | 1.89E+07 | 4.54E+07 | 5.89E+07 | 4.11E+07 | 1.8  | 1.31  | 0.11 | 0.92 |
| GBB1_RAT    | P54311 | 3.24E+08 | 5.56E+08 | 5.84E+08 | 4.88E+08 | 1.66E+08 | 3.36E+08 | 3.39E+08 | 2.80E+08 | 0.8  | 1.31  | 0.11 | 0.92 |
| RL18_RAT    | P12001 | 2.53E+07 | 1.82E+07 | 2.71E+07 | 2.35E+07 | 3.01E+06 | 1.14E+07 | 2.08E+07 | 1.17E+07 | 1.0  | 1.30  | 0.11 | 0.92 |
| 1433F_RAT   | P68511 | 5.51E+07 | 2.07E+08 | 2.14E+08 | 1.59E+08 | 2.04E+07 | 5.77E+07 | 7.27E+07 | 5.03E+07 | 1.7  | 1.29  | 0.12 | 0.91 |
| MYO6_MOUSE  | Q64331 | 6.86E+05 | 3.95E+05 | 8.37E+05 | 6.39E+05 | 5.79E+05 | 3.82E+07 | 3.94E+07 | 2.61E+07 | -5.3 | -1.29 | 0.12 | 0.91 |
| RAB10_MOUSE | P61027 | 1.35E+08 | 1.09E+08 | 1.08E+08 | 1.17E+08 | 2.84E+07 | 9.16E+07 | 9.34E+07 | 7.11E+07 | 0.7  | 1.29  | 0.12 | 0.91 |
| IQEC3_RAT   | Q76M68 | 2.27E+06 | 8.85E+06 | 2.78E+06 | 4.63E+06 | 9.06E+06 | 1.49E+07 | 7.82E+06 | 1.06E+07 | -1.2 | -1.28 | 0.12 | 0.91 |
| COX41_RAT   | P10888 | 7.36E+06 | 5.46E+07 | 5.98E+06 | 2.27E+07 | 2.91E+07 | 1.24E+08 | 1.14E+08 | 8.90E+07 | -2.0 | -1.27 | 0.12 | 0.91 |
| CAZA1_RAT   | B2GUZ5 | 1.30E+08 | 2.41E+08 | 8.79E+07 | 1.53E+08 | 4.96E+07 | 8.32E+07 | 6.05E+07 | 6.44E+07 | 1.2  | 1.25  | 0.13 | 0.90 |
| AT2B1_RAT   | P11505 | 1.88E+08 | 3.93E+08 | 7.16E+07 | 2.17E+08 | 5.55E+07 | 3.22E+07 | 3.40E+07 | 4.06E+07 | 2.4  | 1.25  | 0.13 | 0.90 |
| AT2B2_RAT   | P11506 | 3.00E+07 | 5.88E+07 | 4.70E+07 | 4.53E+07 | 3.18E+07 | 3.13E+07 | 2.33E+07 | 2.88E+07 | 0.7  | 1.25  | 0.13 | 0.90 |
| PKP4_MOUSE  | Q68FH0 | 3.76E+06 | 1.46E+07 | 1.71E+07 | 1.18E+07 | 1.82E+07 | 1.95E+07 | 2.09E+07 | 1.96E+07 | -0.7 | -1.24 | 0.14 | 0.90 |
| AT2B3_RAT   | Q64568 | 2.93E+07 | 5.89E+07 | 4.64E+07 | 4.49E+07 | 3.12E+07 | 3.06E+07 | 2.24E+07 | 2.81E+07 | 0.7  | 1.24  | 0.14 | 0.90 |
| CAPZB_RAT   | Q5XI32 | 6.06E+07 | 2.24E+08 | 2.19E+08 | 1.68E+08 | 4.44E+07 | 6.02E+07 | 9.25E+07 | 6.57E+07 | 1.4  | 1.24  | 0.14 | 0.90 |
| VATA_MOUSE  | P50516 | 2.14E+08 | 3.11E+08 | 2.88E+08 | 2.71E+08 | 8.63E+07 | 2.51E+08 | 1.72E+08 | 1.70E+08 | 0.7  | 1.23  | 0.14 | 0.89 |
| GDAP1_MOUSE | O88741 | 6.88E+07 | 5.07E+07 | 5.96E+07 | 5.97E+07 | 5.84E+07 | 2.21E+08 | 1.58E+08 | 1.46E+08 | -1.3 | -1.22 | 0.14 | 0.89 |
| CSK21_RAT   | P19139 | 1.85E+06 | 5.91E+06 | 2.66E+06 | 3.48E+06 | 7.10E+04 | 3.20E+05 | 2.33E+06 | 9.07E+05 | 1.9  | 1.22  | 0.15 | 0.89 |
| NDUV2_RAT   | P19234 | 9.27E+05 | 6.90E+06 | 1.67E+06 | 3.17E+06 | 2.98E+06 | 2.10E+07 | 1.59E+07 | 1.33E+07 | -2.1 | -1.21 | 0.15 | 0.89 |
| ADT1_MOUSE  | P48962 | 2.62E+08 | 2.87E+08 | 3.31E+08 | 2.94E+08 | 2.89E+08 | 5.63E+08 | 4.71E+08 | 4.41E+08 | -0.6 | -1.21 | 0.15 | 0.89 |
| 1433G_RAT   | P61983 | 1.21E+08 | 2.63E+08 | 2.38E+08 | 2.07E+08 | 9.62E+07 | 1.34E+08 | 1.48E+08 | 1.26E+08 | 0.7  | 1.21  | 0.15 | 0.89 |
| TOM70_RAT   | Q75Q39 | 1.21E+08 | 2.32E+08 | 1.24E+08 | 1.59E+08 | 3.14E+08 | 2.10E+08 | 2.16E+08 | 2.47E+08 | -0.6 | -1.21 | 0.15 | 0.89 |
| MPCP_MOUSE  | Q8VEM8 | 1.49E+07 | 3.70E+07 | 1.56E+07 | 2.25E+07 | 3.67E+07 | 3.44E+07 | 3.41E+07 | 3.51E+07 | -0.6 | -1.19 | 0.16 | 0.88 |
| AKAP5_RAT   | P24587 | 8.61E+06 | 9.73E+06 | 1.03E+07 | 9.56E+06 | 9.68E+06 | 1.16E+07 | 1.27E+07 | 1.13E+07 | -0.2 | -1.19 | 0.16 | 0.88 |
| PCBP1_MOUSE | P60335 | 1.90E+07 | 2.09E+07 | 1.16E+07 | 1.71E+07 | 2.02E+07 | 2.50E+07 | 3.91E+07 | 2.81E+07 | -0.7 | -1.19 | 0.16 | 0.88 |
| SC6A1_RAT   | P23978 | 5.43E+06 | 7.33E+06 | 5.96E+06 | 6.24E+06 | 4.45E+06 | 5.48E+06 | 5.42E+06 | 5.12E+06 | 0.3  | 1.19  | 0.16 | 0.88 |
| KCC2D_RAT   | P15791 | 2.81E+09 | 2.56E+09 | 2.16E+09 | 2.51E+09 | 1.30E+09 | 2.02E+09 | 2.35E+09 | 1.89E+09 | 0.4  | 1.18  | 0.16 | 0.88 |
| E41L3_MOUSE | Q9WV92 | 2.75E+07 | 7.73E+07 | 1.10E+07 | 3.86E+07 | 3.34E+06 | 3.17E+06 | 7.50E+06 | 4.67E+06 | 3.0  | 1.18  | 0.16 | 0.88 |
| 2AAA_MOUSE  | Q76MZ3 | 2.72E+07 | 3.77E+07 | 3.10E+07 | 3.20E+07 | 2.31E+07 | 1.37E+08 | 1.13E+08 | 9.10E+07 | -1.5 | -1.18 | 0.16 | 0.88 |
| GBB2_RAT    | P54313 | 2.15E+08 | 4.64E+08 | 4.55E+08 | 3.78E+08 | 1.27E+08 | 2.74E+08 | 2.56E+08 | 2.19E+08 | 0.8  | 1.18  | 0.17 | 0.88 |
| CTND2_MOUSE | O35927 | 3.17E+07 | 2.69E+07 | 2.68E+07 | 2.84E+07 | 7.07E+06 | 1.60E+07 | 2.90E+07 | 1.74E+07 | 0.7  | 1.18  | 0.17 | 0.88 |
| H2B1N_BOVIN | Q32L48 | 3.44E+08 | 7.54E+05 | 1.59E+08 | 1.68E+08 | 2.38E+06 | 6.16E+06 | 1.63E+06 | 3.39E+06 | 5.6  | 1.17  | 0.17 | 0.87 |
| VAPB_RAT    | Q9Z269 | 6.70E+06 | 5.08E+07 | 1.87E+07 | 2.54E+07 | 5.27E+06 | 2.84E+06 | 2.61E+06 | 3.57E+06 | 2.8  | 1.16  | 0.17 | 0.87 |
| PPIA_RAT    | P10111 | 3.23E+06 | 5.57E+06 | 3.37E+06 | 4.06E+06 | 3.70E+06 | 1.84E+06 | 1.77E+06 | 2.44E+06 | 0.7  | 1.16  | 0.18 | 0.87 |
| DLGP1_RAT   | P97836 | 7.82E+06 | 5.51E+08 | 4.27E+08 | 3.29E+08 | 1.37E+07 | 9.29E+07 | 7.00E+07 | 5.89E+07 | 2.5  | 1.15  | 0.18 | 0.87 |
| LY6H_MOUSE  | Q9WUC3 | 6.31E+07 | 7.38E+07 | 6.57E+07 | 6.76E+07 | 2.21E+07 | 5.08E+07 | 6.64E+07 | 4.64E+07 | 0.5  | 1.13  | 0.19 | 0.86 |
| DLGP4_RAT   | P97839 | 3.84E+06 | 5.50E+06 | 8.35E+06 | 5.90E+06 | 9.42E+06 | 7.06E+06 | 8.23E+06 | 8.23E+06 | -0.5 | -1.13 | 0.19 | 0.86 |
| H2A1_RAT    | P02262 | 8.03E+07 | 1.45E+08 | 1.82E+08 | 1.36E+08 | 1.39E+08 | 2.70E+08 | 2.28E+08 | 2.12E+08 | -0.6 | -1.13 | 0.19 | 0.86 |
| KCC2A_RAT   | P11275 | 6.16E+09 | 4.92E+09 | 3.91E+09 | 5.00E+09 | 2.40E+09 | 3.89E+09 | 4.46E+09 | 3.59E+09 | 0.5  | 1.13  | 0.19 | 0.86 |
| NFM_RAT     | P12839 | 3.82E+08 | 2.53E+08 | 2.02E+08 | 2.79E+08 | 1.96E+08 | 1.97E+08 | 1.95E+08 | 1.96E+08 | 0.5  | 1.12  | 0.20 | 0.85 |
| CAZA2_RAT   | Q3T1K5 | 1.43E+08 | 2.18E+08 | 1.76E+08 | 1.79E+08 | 7.56E+07 | 1.44E+08 | 1.60E+08 | 1.27E+08 | 0.5  | 1.12  | 0.20 | 0.85 |
| KIF5C_MOUSE | P28738 | 2.52E+07 | 6.34E+06 | 5.15E+06 | 1.22E+07 | 3.60E+06 | 1.24E+06 | 1.65E+06 | 2.16E+06 | 2.5  | 1.11  | 0.20 | 0.85 |
| NEB2_RAT    | O35274 | 6.59E+06 | 1.65E+06 | 4.21E+05 | 2.88E+06 | 3.50E+07 | 7.53E+06 | 8.41E+06 | 1.70E+07 | -2.6 | -1.11 | 0.20 | 0.85 |
| VATH_MOUSE  | Q8BVE3 | 6.15E+07 | 4.12E+07 | 5.50E+07 | 5.26E+07 | 1.51E+07 | 3.81E+07 | 5.03E+07 | 3.45E+07 | 0.6  | 1.10  | 0.20 | 0.85 |
| OPALI_HUMAN | Q96PE5 | 2.31E+06 | 2.19E+06 | 3.09E+06 | 2.53E+06 | 6.47E+05 | 1.41E+06 | 2.62E+06 | 1.56E+06 | 0.7  | 1.10  | 0.21 | 0.85 |
| CNKR2_RAT   | Q9Z1T4 | 3.92E+07 | 3.65E+07 | 1.52E+07 | 3.03E+07 | 1.22E+07 | 1.81E+07 | 2.33E+07 | 1.79E+07 | 0.8  | 1.10  | 0.21 | 0.85 |
| SPTB2_MOUSE | Q62261 | 1.83E+09 | 2.03E+09 | 1.94E+09 | 1.93E+09 | 8.43E+08 | 1.71E+09 | 1.82E+09 | 1.46E+09 | 0.4  | 1.09  | 0.21 | 0.85 |

Supplementary Table 3

Supplementary Table 3

|             |        |          |          |          |          |          |          |          |          |      |       |      |      |
|-------------|--------|----------|----------|----------|----------|----------|----------|----------|----------|------|-------|------|------|
| DLG4_RAT    | P31016 | 2.35E+08 | 2.50E+08 | 2.88E+08 | 2.58E+08 | 1.72E+08 | 7.62E+08 | 6.38E+08 | 5.24E+08 | -1.0 | -1.09 | 0.21 | 0.84 |
| NMDZ1_RAT   | P35439 | 4.65E+07 | 2.82E+07 | 7.51E+07 | 4.99E+07 | 3.61E+07 | 1.27E+08 | 1.84E+08 | 1.16E+08 | -1.2 | -1.07 | 0.22 | 0.84 |
| DLGP2_RAT   | P97837 | 2.85E+07 | 1.09E+07 | 5.54E+06 | 1.50E+07 | 1.07E+07 | 5.25E+07 | 4.62E+07 | 3.65E+07 | -1.3 | -1.07 | 0.22 | 0.84 |
| SEPT6_MOUSE | Q9R1T4 | 4.19E+07 | 9.24E+07 | 3.69E+07 | 5.71E+07 | 7.14E+06 | 1.67E+07 | 5.25E+07 | 2.54E+07 | 1.2  | 1.05  | 0.23 | 0.83 |
| VAPA_RAT    | Q9Z270 | 1.31E+07 | 5.92E+07 | 2.31E+07 | 3.18E+07 | 4.24E+05 | 1.19E+07 | 2.00E+07 | 1.07E+07 | 1.6  | 1.04  | 0.24 | 0.82 |
| GSK3B_RAT   | P18266 | 4.80E+06 | 7.35E+06 | 4.73E+06 | 5.63E+06 | 2.29E+06 | 4.87E+06 | 4.75E+06 | 3.97E+06 | 0.5  | 1.03  | 0.24 | 0.82 |
| EAA2_RAT    | P31596 | 2.01E+07 | 3.53E+07 | 2.30E+07 | 2.61E+07 | 1.30E+07 | 2.68E+07 | 9.55E+06 | 1.65E+07 | 0.7  | 1.03  | 0.24 | 0.82 |
| GNAZ_RAT    | P19627 | 1.01E+08 | 7.46E+07 | 9.82E+07 | 9.12E+07 | 8.83E+07 | 1.30E+08 | 1.15E+08 | 1.11E+08 | -0.3 | -1.02 | 0.25 | 0.82 |
| RGS17_MOUSE | Q9QZB0 | 1.28E+07 | 9.44E+06 | 1.77E+07 | 1.33E+07 | 8.74E+06 | 8.60E+06 | 1.20E+07 | 9.78E+06 | 0.4  | 1.02  | 0.25 | 0.81 |
| ECHA_RAT    | Q64428 | 2.22E+07 | 1.76E+07 | 2.69E+07 | 2.22E+07 | 1.72E+07 | 4.00E+07 | 4.66E+07 | 3.46E+07 | -0.6 | -1.01 | 0.25 | 0.81 |
| GBRB3_RAT   | P63079 | 3.23E+06 | 6.59E+06 | 1.25E+06 | 3.69E+06 | 7.43E+05 | 2.54E+06 | 1.21E+06 | 1.50E+06 | 1.3  | 1.01  | 0.25 | 0.81 |
| KCRU_RAT    | P25809 | 4.12E+08 | 4.48E+08 | 4.28E+08 | 4.29E+08 | 3.49E+08 | 7.20E+08 | 7.03E+08 | 5.91E+08 | -0.5 | -1.01 | 0.25 | 0.81 |
| CPNE4_HUMAN | Q96A23 | 2.36E+06 | 6.29E+06 | 3.47E+06 | 4.04E+06 | 9.71E+05 | 3.01E+06 | 2.83E+06 | 2.27E+06 | 0.8  | 1.01  | 0.26 | 0.81 |
| KCC2B_MOUSE | P28652 | 4.01E+09 | 3.40E+09 | 2.55E+09 | 3.32E+09 | 1.57E+09 | 2.50E+09 | 3.31E+09 | 2.46E+09 | 0.4  | 1.00  | 0.26 | 0.81 |
| CAMKV_RAT   | Q63092 | 2.88E+07 | 3.20E+07 | 2.63E+07 | 2.90E+07 | 2.44E+07 | 1.55E+07 | 2.98E+07 | 2.32E+07 | 0.3  | 0.99  | 0.27 | 0.80 |
| COX2_RAT    | P00406 | 4.38E+05 | 3.57E+07 | 1.23E+07 | 1.62E+07 | 8.48E+06 | 6.49E+07 | 5.24E+07 | 4.19E+07 | -1.4 | -0.99 | 0.27 | 0.80 |
| GABR2_RAT   | O88871 | 3.09E+06 | 5.15E+06 | 3.40E+06 | 3.88E+06 | 1.86E+05 | 4.72E+07 | 1.73E+07 | 2.16E+07 | -2.5 | -0.99 | 0.27 | 0.80 |
| ODPB_RAT    | P49432 | 5.43E+06 | 5.10E+06 | 2.16E+06 | 4.23E+06 | 2.48E+06 | 9.99E+06 | 1.23E+07 | 8.25E+06 | -1.0 | -0.99 | 0.27 | 0.80 |
| ODPB_RAT    | P49432 | 5.43E+06 | 5.10E+06 | 2.16E+06 | 4.23E+06 | 2.48E+06 | 9.99E+06 | 1.23E+07 | 8.25E+06 | -1.0 | -0.99 | 0.27 | 0.80 |
| LIPA3_RAT   | Q91279 | 1.19E+08 | 4.12E+07 | 4.85E+08 | 2.15E+08 | 5.52E+06 | 5.52E+07 | 5.55E+07 | 3.87E+07 | 2.5  | 0.98  | 0.27 | 0.80 |
| TMOD2_RAT   | P70566 | 3.86E+07 | 8.59E+07 | 8.95E+07 | 7.14E+07 | 2.31E+07 | 6.33E+07 | 5.04E+07 | 4.56E+07 | 0.6  | 0.98  | 0.27 | 0.80 |
| ARC1A_RAT   | Q99PD4 | 5.65E+07 | 6.44E+07 | 4.38E+07 | 5.49E+07 | 5.17E+06 | 2.14E+07 | 6.56E+07 | 3.07E+07 | 0.8  | 0.98  | 0.27 | 0.80 |
| QCR2_RAT    | P32551 | 2.49E+06 | 1.62E+07 | 1.09E+06 | 6.61E+06 | 1.11E+06 | 4.76E+07 | 2.45E+07 | 2.44E+07 | -1.9 | -0.97 | 0.28 | 0.79 |
| MYPR_RAT    | P60203 | 4.36E+08 | 4.23E+08 | 3.48E+08 | 4.02E+08 | 2.53E+08 | 3.40E+08 | 4.13E+08 | 3.35E+08 | 0.3  | 0.97  | 0.28 | 0.79 |
| MOG_RAT     | Q63345 | 2.27E+08 | 1.32E+08 | 1.72E+08 | 1.77E+08 | 1.35E+08 | 1.36E+08 | 1.56E+08 | 1.42E+08 | 0.3  | 0.96  | 0.28 | 0.79 |
| U626A_MOUSE | Q8C3Q5 | 7.74E+06 | 7.40E+06 | 8.30E+06 | 7.81E+06 | 5.53E+06 | 2.31E+07 | 1.37E+07 | 1.41E+07 | -0.9 | -0.96 | 0.28 | 0.79 |
| ECHB_RAT    | Q60587 | 1.03E+07 | 2.40E+07 | 8.02E+06 | 1.41E+07 | 1.09E+07 | 3.19E+07 | 3.05E+07 | 2.44E+07 | -0.8 | -0.96 | 0.29 | 0.79 |
| CSK11_RAT   | Q8VHK2 | 1.67E+07 | 2.16E+07 | 1.76E+07 | 1.86E+07 | 1.12E+07 | 1.48E+07 | 1.94E+07 | 1.52E+07 | 0.3  | 0.96  | 0.29 | 0.79 |
| REL3_RAT    | Q8BFS3 | 8.99E+06 | 4.04E+06 | 9.42E+06 | 7.48E+06 | 4.08E+06 | 5.86E+06 | 5.79E+06 | 5.24E+06 | 0.5  | 0.96  | 0.29 | 0.79 |
| SEPT7_RAT   | Q9WVC0 | 1.50E+08 | 2.45E+08 | 1.84E+08 | 1.93E+08 | 9.55E+07 | 1.64E+08 | 1.80E+08 | 1.46E+08 | 0.4  | 0.95  | 0.29 | 0.79 |
| GRIA4_HUMAN | P48058 | 1.26E+07 | 2.28E+07 | 2.70E+07 | 2.08E+07 | 8.10E+06 | 6.55E+07 | 5.39E+07 | 4.25E+07 | -1.0 | -0.94 | 0.30 | 0.78 |
| TPM3_RAT    | Q63610 | 2.15E+07 | 4.16E+07 | 1.29E+07 | 2.53E+07 | 1.41E+07 | 1.98E+07 | 1.02E+07 | 1.47E+07 | 0.8  | 0.93  | 0.30 | 0.78 |
| SYN2_RAT    | Q63537 | 7.54E+08 | 8.92E+08 | 9.57E+08 | 8.68E+08 | 5.49E+08 | 6.48E+08 | 9.39E+08 | 7.12E+08 | 0.3  | 0.93  | 0.30 | 0.78 |
| ATAD3_RAT   | Q3KRE0 | 6.10E+05 | 6.06E+07 | 9.62E+06 | 2.36E+07 | 1.75E+07 | 9.35E+07 | 6.26E+07 | 5.79E+07 | -1.3 | -0.93 | 0.30 | 0.78 |
| MYH9_RAT    | Q62812 | 9.92E+06 | 1.69E+07 | 2.72E+07 | 1.80E+07 | 5.46E+06 | 7.73E+06 | 1.82E+07 | 1.05E+07 | 0.8  | 0.93  | 0.30 | 0.78 |
| PHB_RAT     | P67779 | 1.92E+07 | 3.34E+07 | 4.11E+07 | 3.12E+07 | 2.05E+07 | 7.40E+07 | 5.94E+07 | 5.13E+07 | -0.7 | -0.92 | 0.31 | 0.77 |
| DYL2_RAT    | Q78P75 | 1.89E+07 | 4.94E+07 | 2.08E+07 | 2.97E+07 | 3.88E+05 | 2.20E+08 | 8.96E+07 | 1.03E+08 | -1.8 | -0.90 | 0.32 | 0.77 |
| RAC1_RAT    | Q6RUV5 | 4.70E+08 | 6.31E+08 | 4.99E+08 | 5.33E+08 | 2.24E+08 | 4.43E+08 | 5.58E+08 | 4.08E+08 | 0.4  | 0.90  | 0.32 | 0.77 |
| SEP11_MOUSE | Q8C1B7 | 1.39E+08 | 2.26E+08 | 1.87E+08 | 1.84E+08 | 8.97E+07 | 1.37E+08 | 1.92E+08 | 1.40E+08 | 0.4  | 0.90  | 0.32 | 0.77 |
| HSP7C_RAT   | P63018 | 1.21E+09 | 1.21E+09 | 1.61E+09 | 1.34E+09 | 7.31E+08 | 1.07E+09 | 1.42E+09 | 1.07E+09 | 0.3  | 0.90  | 0.32 | 0.77 |
| DLG3_RAT    | Q62936 | 1.06E+08 | 1.01E+08 | 1.12E+08 | 1.06E+08 | 4.42E+07 | 7.24E+07 | 1.24E+08 | 8.01E+07 | 0.4  | 0.89  | 0.33 | 0.76 |
| THIL_RAT    | P17764 | 4.74E+07 | 1.10E+08 | 1.25E+08 | 9.40E+07 | 5.58E+07 | 2.07E+08 | 2.00E+08 | 1.54E+08 | -0.7 | -0.88 | 0.33 | 0.76 |
| ABLM2_RAT   | Q6KCS1 | 2.95E+06 | 4.05E+06 | 7.17E+06 | 4.72E+06 | 1.77E+06 | 3.70E+06 | 3.95E+06 | 3.14E+06 | 0.6  | 0.88  | 0.33 | 0.76 |
| KCD12_MOUSE | Q6WVG3 | 8.74E+07 | 2.41E+08 | 1.60E+08 | 1.63E+08 | 3.10E+07 | 1.36E+08 | 1.35E+08 | 1.01E+08 | 0.7  | 0.88  | 0.33 | 0.76 |
| NCAM1_RAT   | P13596 | 3.67E+07 | 3.46E+07 | 8.18E+07 | 5.11E+07 | 1.41E+07 | 2.97E+07 | 4.93E+07 | 3.10E+07 | 0.7  | 0.87  | 0.34 | 0.75 |
| KPCG_RAT    | P63319 | 1.75E+08 | 1.27E+08 | 6.69E+07 | 1.23E+08 | 3.58E+07 | 1.30E+08 | 6.93E+07 | 7.82E+07 | 0.7  | 0.87  | 0.34 | 0.75 |

Supplementary Table 3

Supplementary Table 3

|             |        |          |          |          |          |          |          |          |          |      |       |      |      |
|-------------|--------|----------|----------|----------|----------|----------|----------|----------|----------|------|-------|------|------|
| MYL6_RAT    | Q64119 | 7.71E+07 | 1.70E+08 | 8.47E+07 | 1.11E+08 | 1.17E+08 | 1.28E+08 | 4.04E+08 | 2.16E+08 | -1.0 | -0.87 | 0.34 | 0.75 |
| FLOT2_RAT   | Q922S9 | 1.38E+07 | 7.81E+07 | 4.15E+07 | 4.45E+07 | 9.00E+06 | 1.46E+08 | 1.27E+08 | 9.41E+07 | -1.1 | -0.86 | 0.35 | 0.75 |
| RPGF2_MOUSE | Q8CHG7 | 1.47E+06 | 2.06E+07 | 1.23E+06 | 7.76E+06 | 1.21E+05 | 2.30E+06 | 4.13E+05 | 9.46E+05 | 3.0  | 0.85  | 0.35 | 0.74 |
| DCLK1_MOUSE | Q9JLM8 | 5.80E+07 | 5.44E+07 | 6.16E+07 | 5.80E+07 | 1.83E+07 | 5.21E+07 | 6.16E+07 | 4.40E+07 | 0.4  | 0.85  | 0.35 | 0.74 |
| GNAI1_RAT   | P10824 | 3.55E+08 | 4.70E+08 | 4.88E+08 | 4.37E+08 | 2.57E+08 | 3.70E+08 | 4.61E+08 | 3.62E+08 | 0.3  | 0.84  | 0.36 | 0.74 |
| S12A5_RAT   | Q63633 | 2.64E+06 | 8.31E+06 | 2.20E+06 | 4.38E+06 | 1.67E+06 | 2.93E+06 | 2.38E+06 | 2.33E+06 | 0.9  | 0.83  | 0.36 | 0.74 |
| NDUA8_MOUSE | Q9DCJ5 | 4.06E+05 | 1.67E+06 | 5.82E+05 | 8.86E+05 | 2.50E+05 | 3.04E+06 | 2.19E+06 | 1.83E+06 | -1.0 | -0.83 | 0.36 | 0.74 |
| EAA1_RAT    | P24942 | 6.22E+06 | 2.37E+06 | 4.55E+06 | 4.38E+06 | 8.63E+06 | 5.36E+07 | 1.35E+06 | 2.12E+07 | -2.3 | -0.83 | 0.36 | 0.74 |
| VATE1_RAT   | Q6PCU2 | 8.25E+07 | 1.23E+08 | 1.02E+08 | 1.03E+08 | 3.47E+07 | 1.14E+08 | 8.04E+07 | 7.63E+07 | 0.4  | 0.83  | 0.36 | 0.73 |
| CN37_RAT    | P13233 | 4.50E+08 | 4.19E+08 | 3.59E+08 | 4.09E+08 | 2.63E+08 | 3.63E+08 | 4.32E+08 | 3.53E+08 | 0.2  | 0.83  | 0.37 | 0.73 |
| GP158_MOUSE | Q8C419 | 4.62E+06 | 9.45E+06 | 7.82E+06 | 7.30E+06 | 2.38E+06 | 1.42E+07 | 3.05E+07 | 1.57E+07 | -1.1 | -0.82 | 0.37 | 0.73 |
| KCNA1_RAT   | P10499 | 1.60E+07 | 2.29E+07 | 1.34E+07 | 1.74E+07 | 5.95E+06 | 1.41E+07 | 1.82E+07 | 1.28E+07 | 0.4  | 0.82  | 0.37 | 0.73 |
| ZO1_MOUSE   | P39447 | 3.66E+05 | 5.18E+06 | 6.76E+05 | 2.07E+06 | 3.14E+06 | 2.16E+06 | 8.47E+06 | 4.59E+06 | -1.1 | -0.82 | 0.37 | 0.73 |
| GRM7_RAT    | P35400 | 4.41E+05 | 1.45E+06 | 1.24E+06 | 1.04E+06 | 7.09E+05 | 1.45E+06 | 1.52E+07 | 5.80E+06 | -2.5 | -0.82 | 0.37 | 0.73 |
| IQEC2_MOUSE | Q5DU25 | 1.50E+07 | 5.04E+07 | 5.25E+07 | 3.93E+07 | 3.15E+07 | 7.56E+07 | 6.50E+07 | 5.74E+07 | -0.5 | -0.82 | 0.37 | 0.73 |
| UN13A_RAT   | Q62768 | 2.92E+06 | 9.42E+05 | 7.09E+06 | 3.65E+06 | 2.92E+06 | 9.53E+06 | 6.42E+06 | 6.29E+06 | -0.8 | -0.82 | 0.37 | 0.73 |
| COR2B_MOUSE | Q8BH44 | 5.20E+06 | 3.26E+06 | 7.11E+06 | 5.19E+06 | 7.28E+05 | 5.12E+06 | 4.43E+06 | 3.42E+06 | 0.6  | 0.82  | 0.37 | 0.73 |
| NDKA_RAT    | Q05982 | 1.26E+07 | 3.05E+06 | 6.18E+06 | 7.27E+06 | 6.12E+06 | 1.32E+07 | 1.36E+07 | 1.10E+07 | -0.6 | -0.81 | 0.38 | 0.73 |
| CAC1A_MOUSE | P97445 | 2.28E+04 | 7.30E+04 | 1.59E+05 | 8.49E+04 | 6.98E+04 | 8.03E+06 | 3.18E+04 | 2.71E+06 | -5.0 | -0.81 | 0.38 | 0.72 |
| CD59_RAT    | P27274 | 6.60E+07 | 1.13E+08 | 9.68E+07 | 9.20E+07 | 8.53E+07 | 1.20E+08 | 1.24E+08 | 1.10E+08 | -0.3 | -0.79 | 0.39 | 0.72 |
| ATPB_RAT    | P10719 | 1.43E+07 | 3.85E+07 | 2.94E+07 | 2.74E+07 | 2.02E+07 | 4.54E+07 | 5.05E+07 | 3.87E+07 | -0.5 | -0.79 | 0.39 | 0.72 |
| VPP1_RAT    | P25286 | 2.05E+08 | 3.42E+08 | 3.99E+08 | 3.15E+08 | 1.32E+08 | 3.51E+08 | 2.17E+08 | 2.33E+08 | 0.4  | 0.79  | 0.39 | 0.71 |
| CLH_RAT     | P11442 | 2.87E+07 | 6.64E+07 | 4.30E+07 | 4.60E+07 | 3.45E+07 | 4.92E+07 | 3.52E+08 | 1.45E+08 | -1.7 | -0.79 | 0.39 | 0.71 |
| TOM20_RAT   | Q62760 | 1.65E+07 | 1.68E+07 | 2.06E+07 | 1.80E+07 | 1.30E+07 | 1.34E+08 | 1.87E+07 | 5.51E+07 | -1.6 | -0.78 | 0.40 | 0.71 |
| RP3A_RAT    | P47709 | 1.00E+07 | 1.22E+07 | 9.49E+06 | 1.06E+07 | 3.84E+07 | 9.32E+06 | 1.08E+07 | 1.95E+07 | -0.9 | -0.78 | 0.40 | 0.71 |
| ODP2_RAT    | P08461 | 3.42E+06 | 6.74E+06 | 2.51E+06 | 4.22E+06 | 4.02E+06 | 1.89E+07 | 4.11E+06 | 9.00E+06 | -1.1 | -0.77 | 0.40 | 0.71 |
| AP2B1_RAT   | P62944 | 1.68E+08 | 1.35E+08 | 8.02E+07 | 1.28E+08 | 4.22E+07 | 1.17E+08 | 1.22E+08 | 9.37E+07 | 0.4  | 0.77  | 0.40 | 0.71 |
| COX5A_RAT   | P11240 | 2.35E+07 | 9.54E+07 | 3.99E+07 | 5.29E+07 | 1.60E+07 | 1.17E+08 | 1.54E+08 | 9.56E+07 | -0.9 | -0.76 | 0.41 | 0.70 |
| GNAO_RAT    | P59215 | 1.05E+09 | 1.43E+09 | 1.34E+09 | 1.27E+09 | 7.98E+08 | 1.21E+09 | 1.29E+09 | 1.10E+09 | 0.2  | 0.76  | 0.41 | 0.70 |
| ANK2_MOUSE  | Q8C8R3 | 7.13E+08 | 9.99E+08 | 8.77E+08 | 8.63E+08 | 4.88E+08 | 8.78E+08 | 8.24E+08 | 7.30E+08 | 0.2  | 0.75  | 0.42 | 0.70 |
| KIF2A_RAT   | Q9WV63 | 3.86E+07 | 5.66E+07 | 4.80E+07 | 4.77E+07 | 1.71E+07 | 5.04E+07 | 4.45E+07 | 3.74E+07 | 0.4  | 0.75  | 0.42 | 0.70 |
| KIF2A_MOUSE | Q9WV63 | 3.86E+07 | 5.66E+07 | 4.80E+07 | 4.77E+07 | 1.71E+07 | 5.04E+07 | 4.45E+07 | 3.74E+07 | 0.4  | 0.75  | 0.42 | 0.70 |
| MYH14_MOUSE | Q6URW6 | 1.74E+06 | 3.26E+06 | 2.95E+06 | 2.65E+06 | 3.51E+06 | 2.03E+06 | 5.14E+06 | 3.56E+06 | -0.4 | -0.75 | 0.42 | 0.70 |
| OMGP_MOUSE  | Q63912 | 1.09E+08 | 1.13E+08 | 1.31E+08 | 1.18E+08 | 9.70E+07 | 2.67E+08 | 1.30E+08 | 1.64E+08 | -0.5 | -0.74 | 0.42 | 0.69 |
| CA2D1_RAT   | P54290 | 3.52E+06 | 8.24E+06 | 3.05E+06 | 4.94E+06 | 2.64E+05 | 1.97E+06 | 6.15E+06 | 2.79E+06 | 0.8  | 0.74  | 0.42 | 0.69 |
| NMDE2_MOUSE | Q01097 | 1.01E+08 | 1.13E+08 | 1.47E+08 | 1.20E+08 | 9.40E+07 | 1.58E+08 | 1.92E+08 | 1.48E+08 | -0.3 | -0.73 | 0.44 | 0.69 |
| AP2M1_RAT   | P84092 | 8.61E+07 | 8.08E+07 | 1.06E+08 | 9.09E+07 | 6.04E+07 | 5.84E+07 | 1.08E+08 | 7.55E+07 | 0.3  | 0.72  | 0.44 | 0.69 |
| CLAP2_RAT   | Q99JD4 | 4.65E+07 | 7.42E+07 | 7.90E+07 | 6.66E+07 | 1.40E+07 | 9.67E+07 | 1.24E+07 | 4.10E+07 | 0.7  | 0.72  | 0.44 | 0.68 |
| ATPA_RAT    | P15999 | 1.75E+08 | 8.40E+07 | 2.42E+08 | 1.67E+08 | 1.55E+08 | 1.22E+08 | 9.86E+07 | 1.25E+08 | 0.4  | 0.72  | 0.44 | 0.68 |
| PACS1_RAT   | O88588 | 2.71E+06 | 5.81E+06 | 6.03E+06 | 4.85E+06 | 4.62E+06 | 1.33E+07 | 4.55E+06 | 7.49E+06 | -0.6 | -0.72 | 0.44 | 0.68 |
| SYN1_RAT    | P09951 | 1.65E+09 | 2.01E+09 | 2.04E+09 | 1.90E+09 | 1.30E+09 | 1.65E+09 | 2.10E+09 | 1.68E+09 | 0.2  | 0.71  | 0.45 | 0.68 |
| PLEC1_RAT   | P30427 | 9.64E+07 | 5.12E+07 | 2.67E+07 | 5.81E+07 | 2.79E+07 | 1.13E+08 | 1.27E+08 | 8.93E+07 | -0.6 | -0.71 | 0.45 | 0.68 |
| LANC1_RAT   | Q9QX69 | 1.77E+06 | 3.14E+06 | 1.06E+06 | 1.99E+06 | 3.78E+06 | 1.62E+06 | 2.77E+06 | 2.72E+06 | -0.5 | -0.71 | 0.45 | 0.68 |
| HOME1_RAT   | Q9Z214 | 8.01E+07 | 1.15E+08 | 1.20E+08 | 1.05E+08 | 7.26E+07 | 1.45E+08 | 1.89E+08 | 1.35E+08 | -0.4 | -0.71 | 0.45 | 0.68 |
| MAP1B_RAT   | P15205 | 3.09E+08 | 4.21E+08 | 3.12E+08 | 3.47E+08 | 2.45E+08 | 3.43E+08 | 3.34E+08 | 3.07E+08 | 0.2  | 0.70  | 0.46 | 0.67 |
| MYH10_RAT   | Q9JLTO | 8.36E+07 | 1.24E+08 | 1.70E+08 | 1.26E+08 | 4.87E+07 | 1.01E+08 | 1.39E+08 | 9.61E+07 | 0.4  | 0.69  | 0.46 | 0.67 |

Supplementary Table 3

Supplementary Table 3

|             |        |          |          |          |          |          |          |          |          |      |       |      |      |
|-------------|--------|----------|----------|----------|----------|----------|----------|----------|----------|------|-------|------|------|
| PRI0_MOUSE  | P04925 | 9.37E+07 | 1.27E+08 | 1.13E+08 | 1.11E+08 | 3.50E+07 | 1.09E+08 | 1.20E+08 | 8.80E+07 | 0.3  | 0.69  | 0.46 | 0.67 |
| VDAC1_RAT   | Q9Z2L0 | 2.73E+09 | 4.51E+09 | 3.68E+09 | 3.64E+09 | 2.50E+09 | 5.07E+09 | 6.42E+09 | 4.67E+09 | -0.4 | -0.69 | 0.46 | 0.67 |
| CH60_RAT    | P63039 | 3.44E+06 | 8.02E+06 | 4.95E+06 | 5.47E+06 | 1.33E+06 | 6.15E+06 | 3.32E+07 | 1.36E+07 | -1.3 | -0.68 | 0.46 | 0.67 |
| U626B_MOUSE | Q3UH99 | 1.64E+07 | 4.26E+07 | 9.03E+07 | 4.97E+07 | 2.93E+06 | 5.87E+07 | 2.25E+07 | 2.80E+07 | 0.8  | 0.68  | 0.47 | 0.66 |
| BSN_RAT     | O88778 | 9.06E+08 | 1.14E+09 | 1.14E+09 | 1.06E+09 | 7.84E+08 | 1.41E+09 | 1.61E+09 | 1.27E+09 | -0.3 | -0.68 | 0.47 | 0.66 |
| SAM50_RAT   | Q6AXV4 | 7.95E+07 | 5.80E+07 | 4.34E+07 | 6.03E+07 | 3.22E+07 | 1.05E+08 | 1.07E+08 | 8.16E+07 | -0.4 | -0.67 | 0.47 | 0.66 |
| SYN3_RAT    | O70441 | 1.79E+07 | 2.81E+07 | 4.61E+07 | 3.07E+07 | 1.93E+07 | 2.57E+07 | 2.70E+07 | 2.40E+07 | 0.4  | 0.67  | 0.48 | 0.66 |
| KAPCB_RAT   | P68182 | 3.49E+07 | 3.41E+06 | 9.15E+06 | 1.58E+07 | 3.08E+06 | 1.39E+07 | 6.58E+06 | 7.85E+06 | 1.0  | 0.66  | 0.48 | 0.66 |
| NEUM_RAT    | P07936 | 8.18E+07 | 1.23E+08 | 1.30E+08 | 1.11E+08 | 6.93E+07 | 1.73E+08 | 1.85E+08 | 1.42E+08 | -0.4 | -0.66 | 0.48 | 0.66 |
| H4_RAT      | P62804 | 8.73E+08 | 4.15E+07 | 8.03E+07 | 3.32E+08 | 1.44E+08 | 1.21E+08 | 9.52E+07 | 1.20E+08 | 1.5  | 0.66  | 0.48 | 0.66 |
| MTX2_MOUSE  | O88441 | 6.21E+06 | 9.47E+06 | 5.62E+06 | 7.10E+06 | 1.11E+06 | 5.64E+06 | 8.70E+06 | 5.15E+06 | 0.5  | 0.66  | 0.48 | 0.66 |
| GTR1_RAT    | P11167 | 2.58E+07 | 5.02E+07 | 3.35E+07 | 3.65E+07 | 9.02E+06 | 4.92E+07 | 1.84E+07 | 2.55E+07 | 0.5  | 0.66  | 0.48 | 0.66 |
| DYL1_RAT    | P63170 | 1.65E+07 | 3.24E+07 | 2.18E+07 | 2.36E+07 | 3.63E+05 | 8.75E+07 | 4.22E+07 | 4.34E+07 | -0.9 | -0.66 | 0.48 | 0.65 |
| MFF_MOUSE   | Q6PCP5 | 4.37E+06 | 1.42E+07 | 8.98E+06 | 9.20E+06 | 5.33E+06 | 2.09E+07 | 1.36E+07 | 1.33E+07 | -0.5 | -0.65 | 0.49 | 0.65 |
| ADT2_RAT    | Q09073 | 1.77E+08 | 3.44E+08 | 3.94E+08 | 3.05E+08 | 2.48E+08 | 4.25E+08 | 4.51E+08 | 3.75E+08 | -0.3 | -0.65 | 0.49 | 0.65 |
| GPD_M_RAT   | P35571 | 2.40E+07 | 4.42E+07 | 1.01E+07 | 2.61E+07 | 2.74E+05 | 2.93E+07 | 1.90E+07 | 1.62E+07 | 0.7  | 0.65  | 0.49 | 0.65 |
| NFH_MOUSE   | P19246 | 2.19E+08 | 1.44E+08 | 1.36E+08 | 1.66E+08 | 1.63E+08 | 1.13E+08 | 1.53E+08 | 1.43E+08 | 0.2  | 0.64  | 0.49 | 0.65 |
| RIMS1_RAT   | Q9JIR4 | 1.11E+07 | 6.97E+06 | 2.22E+08 | 8.00E+07 | 1.83E+06 | 4.11E+07 | 3.44E+07 | 2.58E+07 | 1.6  | 0.64  | 0.49 | 0.65 |
| BAIP2_RAT   | Q6GMN2 | 2.62E+08 | 4.10E+08 | 5.38E+08 | 4.03E+08 | 3.42E+08 | 3.30E+08 | 3.57E+08 | 3.43E+08 | 0.2  | 0.64  | 0.49 | 0.65 |
| GLNA_RAT    | P09606 | 8.27E+07 | 2.21E+08 | 2.58E+08 | 1.87E+08 | 4.27E+07 | 1.69E+08 | 1.92E+08 | 1.34E+08 | 0.5  | 0.64  | 0.50 | 0.65 |
| AGAP2_RAT   | Q8CGU4 | 8.98E+06 | 5.83E+06 | 4.63E+06 | 6.48E+06 | 5.76E+06 | 1.19E+07 | 6.88E+06 | 8.19E+06 | -0.3 | -0.64 | 0.50 | 0.64 |
| DLGP3_MOUSE | Q6PFD5 | 3.04E+07 | 2.07E+07 | 3.83E+07 | 2.98E+07 | 1.90E+07 | 6.94E+07 | 3.57E+07 | 4.14E+07 | -0.5 | -0.63 | 0.50 | 0.64 |
| NTRI_MOUSE  | Q99PJ0 | 3.14E+07 | 7.70E+07 | 4.75E+07 | 5.20E+07 | 5.23E+06 | 2.84E+08 | 5.74E+07 | 1.15E+08 | -1.2 | -0.63 | 0.50 | 0.64 |
| IMMT_MOUSE  | Q8CAQ8 | 3.24E+08 | 4.11E+08 | 4.83E+08 | 4.06E+08 | 3.07E+08 | 5.25E+08 | 6.02E+08 | 4.78E+08 | -0.2 | -0.62 | 0.51 | 0.64 |
| CALM_RAT    | P62161 | 8.31E+07 | 9.56E+07 | 1.28E+08 | 1.02E+08 | 7.21E+07 | 1.60E+08 | 1.39E+08 | 1.24E+08 | -0.3 | -0.62 | 0.51 | 0.64 |
| RHOG_MOUSE  | P84096 | 3.44E+06 | 2.75E+06 | 5.61E+06 | 3.93E+06 | 2.95E+06 | 4.86E+05 | 5.01E+06 | 2.82E+06 | 0.5  | 0.61  | 0.51 | 0.63 |
| SHAN2_RAT   | Q9QX74 | 5.79E+08 | 4.08E+07 | 6.07E+07 | 2.27E+08 | 4.53E+07 | 9.50E+07 | 1.57E+08 | 9.90E+07 | 1.2  | 0.61  | 0.51 | 0.63 |
| AP2A2_RAT   | P18484 | 1.15E+08 | 2.15E+08 | 9.89E+07 | 1.43E+08 | 7.60E+07 | 6.03E+08 | 1.18E+08 | 2.65E+08 | -0.9 | -0.61 | 0.52 | 0.63 |
| ARP3_RAT    | Q4V7C7 | 8.61E+06 | 1.96E+07 | 6.44E+06 | 1.16E+07 | 6.90E+06 | 2.08E+07 | 1.97E+07 | 1.58E+07 | -0.4 | -0.60 | 0.52 | 0.63 |
| MACF1_HUMAN | Q9UPN3 | 6.30E+05 | 4.23E+05 | 3.63E+06 | 1.56E+06 | 2.77E+06 | 1.55E+05 | 5.81E+06 | 2.91E+06 | -0.9 | -0.60 | 0.52 | 0.63 |
| FLOT1_RAT   | Q9Z1E1 | 2.28E+07 | 5.77E+07 | 4.33E+07 | 4.12E+07 | 1.40E+07 | 7.55E+07 | 8.55E+07 | 5.84E+07 | -0.5 | -0.60 | 0.52 | 0.63 |
| IQEC1_MOUSE | Q8R0S2 | 2.87E+07 | 4.29E+07 | 1.95E+07 | 3.04E+07 | 2.49E+07 | 6.55E+07 | 3.04E+07 | 4.03E+07 | -0.4 | -0.59 | 0.53 | 0.62 |
| HOME3_RAT   | Q9Z2X5 | 6.32E+06 | 1.06E+07 | 1.47E+07 | 1.05E+07 | 8.70E+06 | 1.84E+07 | 1.21E+07 | 1.31E+07 | -0.3 | -0.58 | 0.54 | 0.62 |
| IGSF8_MOUSE | Q8R366 | 3.66E+06 | 5.21E+06 | 7.67E+05 | 3.21E+06 | 2.89E+05 | 7.92E+05 | 4.71E+06 | 1.93E+06 | 0.7  | 0.58  | 0.54 | 0.62 |
| GD1L1_MOUSE | Q8VE33 | 2.41E+06 | 1.22E+07 | 2.21E+06 | 5.62E+06 | 4.54E+06 | 1.08E+07 | 9.09E+06 | 8.16E+06 | -0.5 | -0.58 | 0.54 | 0.62 |
| MYO1D_RAT   | Q63357 | 9.46E+06 | 6.23E+05 | 5.53E+05 | 3.55E+06 | 3.23E+06 | 3.81E+06 | 1.15E+07 | 6.19E+06 | -0.8 | -0.57 | 0.54 | 0.62 |
| PP2BB_RAT   | P20651 | 4.06E+07 | 4.64E+07 | 2.24E+07 | 3.64E+07 | 1.73E+07 | 4.60E+07 | 2.38E+07 | 2.90E+07 | 0.3  | 0.57  | 0.55 | 0.61 |
| OPA1_RAT    | Q2TA68 | 7.29E+07 | 1.72E+08 | 1.03E+08 | 1.16E+08 | 3.42E+07 | 1.99E+08 | 2.60E+08 | 1.64E+08 | -0.5 | -0.57 | 0.55 | 0.61 |
| STX1B_RAT   | P61265 | 3.68E+07 | 2.79E+07 | 2.30E+07 | 2.92E+07 | 3.20E+07 | 5.83E+07 | 2.06E+07 | 3.70E+07 | -0.3 | -0.57 | 0.55 | 0.61 |
| PRRT1_RAT   | Q6MG82 | 1.05E+07 | 3.64E+07 | 2.78E+07 | 2.49E+07 | 2.73E+07 | 2.58E+07 | 3.86E+07 | 3.05E+07 | -0.3 | -0.57 | 0.55 | 0.61 |
| KAPO_RAT    | P09456 | 8.49E+07 | 6.56E+07 | 6.98E+05 | 5.04E+07 | 3.07E+06 | 2.10E+06 | 7.67E+07 | 2.73E+07 | 0.9  | 0.57  | 0.55 | 0.61 |
| ENPP6_RAT   | B0BND0 | 4.71E+07 | 4.67E+07 | 4.62E+07 | 4.67E+07 | 1.25E+07 | 4.88E+07 | 5.37E+07 | 3.84E+07 | 0.3  | 0.56  | 0.56 | 0.61 |
| SYNPO_RAT   | Q9Z327 | 7.98E+06 | 2.59E+06 | 2.24E+06 | 4.27E+06 | 3.32E+06 | 1.61E+07 | 2.52E+06 | 7.31E+06 | -0.8 | -0.55 | 0.56 | 0.61 |
| OGT1_MOUSE  | Q8CGY8 | 2.07E+06 | 7.29E+05 | 5.69E+05 | 1.12E+06 | 6.19E+04 | 5.68E+06 | 9.19E+05 | 2.22E+06 | -1.0 | -0.53 | 0.58 | 0.59 |
| GRIA1_RAT   | P19490 | 8.43E+07 | 1.80E+08 | 1.59E+08 | 1.41E+08 | 5.22E+07 | 1.46E+08 | 1.47E+08 | 1.15E+08 | 0.3  | 0.53  | 0.58 | 0.59 |
| SYGP1_RAT   | Q9QUH6 | 9.97E+08 | 1.10E+09 | 1.32E+09 | 1.14E+09 | 8.12E+08 | 1.40E+09 | 1.71E+09 | 1.31E+09 | -0.2 | -0.53 | 0.58 | 0.59 |

Supplementary Table 3

Supplementary Table 3

|             |        |          |          |          |          |          |          |          |          |      |       |      |      |
|-------------|--------|----------|----------|----------|----------|----------|----------|----------|----------|------|-------|------|------|
| PGCB_RAT    | P55068 | 1.50E+07 | 2.00E+06 | 2.21E+06 | 6.41E+06 | 3.89E+06 | 9.92E+06 | 1.52E+07 | 9.66E+06 | -0.6 | -0.53 | 0.58 | 0.59 |
| ADDA_RAT    | Q63028 | 1.08E+08 | 2.26E+08 | 6.82E+07 | 1.34E+08 | 2.93E+07 | 9.74E+07 | 1.65E+08 | 9.73E+07 | 0.5  | 0.52  | 0.58 | 0.59 |
| LSAMP_RAT   | Q62813 | 1.26E+08 | 1.51E+08 | 1.37E+08 | 1.38E+08 | 9.69E+07 | 1.95E+08 | 1.77E+08 | 1.56E+08 | -0.2 | -0.52 | 0.59 | 0.59 |
| GRIA3_MOUSE | Q9Z2W9 | 3.11E+07 | 3.40E+07 | 3.42E+07 | 3.31E+07 | 1.16E+07 | 6.15E+07 | 5.34E+07 | 4.22E+07 | -0.4 | -0.52 | 0.59 | 0.59 |
| TPIS_RAT    | P48500 | 5.03E+07 | 3.09E+08 | 3.55E+08 | 2.38E+08 | 2.44E+08 | 2.91E+08 | 3.53E+08 | 2.96E+08 | -0.3 | -0.51 | 0.60 | 0.58 |
| ERC2_RAT    | Q8K3M6 | 1.44E+08 | 1.91E+08 | 2.43E+08 | 1.93E+08 | 1.14E+08 | 3.47E+08 | 2.43E+08 | 2.35E+08 | -0.3 | -0.51 | 0.60 | 0.58 |
| GHC1_MOUSE  | Q9D6M3 | 6.65E+08 | 2.38E+08 | 6.22E+08 | 5.08E+08 | 1.73E+08 | 5.07E+08 | 5.36E+08 | 4.05E+08 | 0.3  | 0.50  | 0.60 | 0.58 |
| TAGL3_RAT   | P37805 | 1.61E+07 | 8.38E+07 | 4.96E+07 | 4.98E+07 | 1.30E+07 | 1.12E+08 | 8.59E+07 | 7.02E+07 | -0.5 | -0.50 | 0.60 | 0.58 |
| BIN1_RAT    | O08839 | 2.83E+07 | 4.46E+07 | 2.25E+07 | 3.18E+07 | 1.40E+07 | 2.22E+07 | 4.14E+07 | 2.58E+07 | 0.3  | 0.50  | 0.60 | 0.58 |
| ODO1_RAT    | Q5X178 | 6.27E+06 | 7.15E+06 | 7.69E+06 | 7.04E+06 | 3.54E+05 | 2.29E+07 | 9.03E+06 | 1.08E+07 | -0.6 | -0.50 | 0.60 | 0.58 |
| ACTN1_RAT   | Q9Z1P2 | 6.12E+07 | 4.39E+07 | 4.20E+07 | 4.90E+07 | 2.77E+07 | 1.19E+08 | 4.78E+07 | 6.49E+07 | -0.4 | -0.49 | 0.61 | 0.58 |
| GIT1_RAT    | Q9Z272 | 6.33E+06 | 1.67E+07 | 6.37E+06 | 9.81E+06 | 2.71E+06 | 1.26E+07 | 6.61E+06 | 7.30E+06 | 0.4  | 0.49  | 0.61 | 0.58 |
| GFAP_RAT    | P47819 | 9.74E+08 | 6.93E+08 | 7.71E+08 | 8.13E+08 | 5.66E+08 | 1.05E+09 | 1.16E+09 | 9.23E+08 | -0.2 | -0.49 | 0.61 | 0.57 |
| CYFP2_MOUSE | Q5SQX6 | 6.67E+07 | 8.82E+07 | 5.64E+07 | 7.04E+07 | 4.21E+07 | 7.67E+07 | 6.95E+07 | 6.28E+07 | 0.2  | 0.48  | 0.62 | 0.57 |
| A26CB_HUMAN | A5A3E0 | 1.95E+09 | 1.65E+09 | 2.38E+09 | 2.00E+09 | 1.14E+09 | 1.82E+09 | 2.36E+09 | 1.77E+09 | 0.2  | 0.47  | 0.62 | 0.57 |
| NCAN_RAT    | P55067 | 5.55E+07 | 4.23E+07 | 7.85E+07 | 5.88E+07 | 4.60E+07 | 8.54E+07 | 6.99E+07 | 6.71E+07 | -0.2 | -0.47 | 0.62 | 0.57 |
| ICAM5_MOUSE | Q60625 | 1.89E+06 | 1.42E+07 | 6.56E+06 | 7.54E+06 | 3.97E+06 | 5.53E+06 | 7.20E+06 | 5.57E+06 | 0.4  | 0.47  | 0.62 | 0.57 |
| ACTB_RAT    | P60711 | 8.49E+09 | 1.01E+10 | 9.65E+09 | 9.42E+09 | 5.52E+09 | 1.02E+10 | 9.98E+09 | 8.57E+09 | 0.1  | 0.47  | 0.63 | 0.57 |
| RS10_RAT    | P63326 | 1.57E+06 | 5.94E+06 | 3.08E+06 | 3.53E+06 | 6.99E+05 | 7.78E+06 | 6.04E+06 | 4.84E+06 | -0.5 | -0.47 | 0.63 | 0.57 |
| SHAN1_RAT   | Q9WV48 | 8.26E+07 | 1.17E+08 | 1.83E+08 | 1.28E+08 | 8.65E+07 | 1.62E+08 | 2.03E+08 | 1.51E+08 | -0.2 | -0.45 | 0.64 | 0.56 |
| LPPR4_RAT   | Q7TMB7 | 4.25E+06 | 4.01E+07 | 2.00E+07 | 2.15E+07 | 1.69E+07 | 1.03E+07 | 2.09E+07 | 1.60E+07 | 0.4  | 0.44  | 0.64 | 0.56 |
| KCNA3_RAT   | P15384 | 1.05E+07 | 2.01E+07 | 9.83E+06 | 1.35E+07 | 3.28E+06 | 1.67E+07 | 1.27E+07 | 1.09E+07 | 0.3  | 0.44  | 0.64 | 0.55 |
| NRN1_RAT    | O08957 | 3.25E+07 | 1.95E+07 | 4.36E+07 | 3.19E+07 | 3.36E+07 | 4.91E+07 | 2.71E+07 | 3.66E+07 | -0.2 | -0.44 | 0.65 | 0.55 |
| SEPT9_RAT   | Q9QZR6 | 1.50E+07 | 5.64E+07 | 2.46E+07 | 3.20E+07 | 2.46E+06 | 7.57E+06 | 5.52E+07 | 2.17E+07 | 0.6  | 0.43  | 0.65 | 0.55 |
| CSPG2_RAT   | Q9ERB4 | 2.82E+07 | 8.74E+07 | 4.58E+07 | 5.38E+07 | 3.02E+07 | 6.10E+07 | 4.15E+07 | 4.42E+07 | 0.3  | 0.43  | 0.65 | 0.55 |
| PCLO_RAT    | Q9JKS6 | 1.47E+08 | 2.43E+08 | 2.30E+08 | 2.06E+08 | 6.58E+07 | 4.71E+08 | 2.57E+08 | 2.65E+08 | -0.4 | -0.43 | 0.66 | 0.55 |
| SYNJ1_RAT   | Q62910 | 9.53E+06 | 9.43E+06 | 8.43E+06 | 9.13E+06 | 1.56E+07 | 3.15E+06 | 2.58E+06 | 7.09E+06 | 0.4  | 0.43  | 0.66 | 0.55 |
| PRR7_RAT    | P0C6T3 | 3.67E+06 | 4.68E+06 | 4.44E+06 | 4.26E+06 | 2.44E+06 | 6.03E+06 | 6.11E+06 | 4.86E+06 | -0.2 | -0.42 | 0.66 | 0.55 |
| CADH2_RAT   | Q9Z1Y3 | 5.49E+06 | 1.53E+07 | 1.17E+07 | 1.08E+07 | 5.65E+06 | 1.50E+07 | 5.92E+06 | 8.84E+06 | 0.3  | 0.42  | 0.66 | 0.54 |
| PP1B_RAT    | P62142 | 1.47E+07 | 5.96E+06 | 5.97E+06 | 8.88E+06 | 1.53E+05 | 1.17E+07 | 2.59E+07 | 1.26E+07 | -0.5 | -0.41 | 0.67 | 0.54 |
| AT1B1_RAT   | P07340 | 1.42E+08 | 2.14E+08 | 1.64E+08 | 1.73E+08 | 8.01E+07 | 2.05E+08 | 1.75E+08 | 1.53E+08 | 0.2  | 0.41  | 0.67 | 0.54 |
| AT1A1_RAT   | P06685 | 2.80E+08 | 5.71E+08 | 4.66E+08 | 4.39E+08 | 1.95E+08 | 3.74E+08 | 5.61E+08 | 3.76E+08 | 0.2  | 0.41  | 0.67 | 0.54 |
| KCNA2_RAT   | P63142 | 1.05E+07 | 2.11E+07 | 9.83E+06 | 1.38E+07 | 3.28E+06 | 1.67E+07 | 1.42E+07 | 1.14E+07 | 0.3  | 0.39  | 0.68 | 0.53 |
| MTCH2_MOUSE | Q791V5 | 1.34E+08 | 1.43E+08 | 1.31E+08 | 1.36E+08 | 9.16E+07 | 1.29E+08 | 2.49E+08 | 1.57E+08 | -0.2 | -0.39 | 0.69 | 0.53 |
| LRFN6_MOUSE | Q68FM6 | 2.32E+07 | 3.57E+06 | 7.56E+06 | 1.15E+07 | 3.98E+06 | 1.19E+07 | 1.00E+07 | 8.65E+06 | 0.4  | 0.39  | 0.69 | 0.53 |
| ABCB8_RAT   | Q5RKI8 | 2.45E+07 | 1.00E+08 | 3.96E+06 | 4.29E+07 | 7.49E+06 | 3.68E+07 | 4.41E+07 | 2.95E+07 | 0.5  | 0.38  | 0.69 | 0.53 |
| BASP_RAT    | Q05175 | 7.41E+08 | 1.29E+09 | 1.17E+09 | 1.07E+09 | 7.05E+08 | 1.36E+09 | 1.52E+09 | 1.20E+09 | -0.2 | -0.38 | 0.69 | 0.53 |
| LGI1_RAT    | Q8K4Y5 | 7.56E+07 | 9.27E+07 | 3.59E+07 | 6.81E+07 | 3.81E+07 | 7.29E+07 | 6.89E+07 | 6.00E+07 | 0.2  | 0.36  | 0.71 | 0.52 |
| SPTN2_RAT   | Q9QWN8 | 3.28E+08 | 3.62E+08 | 5.25E+08 | 4.05E+08 | 2.59E+08 | 6.05E+08 | 4.94E+08 | 4.52E+08 | -0.2 | -0.36 | 0.71 | 0.52 |
| KAPCA_RAT   | P27791 | 8.75E+06 | 3.74E+07 | 1.16E+07 | 1.93E+07 | 3.08E+06 | 4.00E+07 | 3.18E+07 | 2.49E+07 | -0.4 | -0.35 | 0.71 | 0.51 |
| G3P_RAT     | P04797 | 8.14E+08 | 9.35E+08 | 8.01E+08 | 8.50E+08 | 5.18E+08 | 5.61E+08 | 1.21E+09 | 7.63E+08 | 0.2  | 0.34  | 0.72 | 0.51 |
| CXA1_RAT    | P08050 | 2.57E+08 | 3.24E+08 | 2.92E+08 | 2.91E+08 | 9.63E+07 | 3.41E+08 | 3.40E+08 | 2.59E+08 | 0.2  | 0.34  | 0.72 | 0.51 |
| MAP1A_RAT   | P34926 | 2.33E+08 | 3.56E+08 | 4.55E+08 | 3.48E+08 | 4.47E+08 | 2.51E+08 | 2.44E+08 | 3.14E+08 | 0.1  | 0.33  | 0.73 | 0.51 |
| HPLN1_RAT   | P03994 | 7.39E+07 | 3.40E+07 | 4.20E+07 | 5.00E+07 | 3.49E+07 | 7.59E+07 | 5.76E+07 | 5.61E+07 | -0.2 | -0.32 | 0.74 | 0.50 |
| CISD1_RAT   | B0K020 | 2.87E+07 | 7.88E+07 | 3.35E+07 | 4.70E+07 | 2.42E+07 | 5.20E+07 | 9.21E+07 | 5.61E+07 | -0.3 | -0.32 | 0.74 | 0.50 |
| KAP3_RAT    | P12369 | 9.16E+06 | 1.47E+07 | 6.69E+06 | 1.02E+07 | 6.67E+06 | 1.28E+07 | 1.48E+07 | 1.14E+07 | -0.2 | -0.32 | 0.74 | 0.50 |

Supplementary Table 3

Supplementary Table 3

|             |        |          |          |          |          |          |          |          |          |      |       |      |      |
|-------------|--------|----------|----------|----------|----------|----------|----------|----------|----------|------|-------|------|------|
| DREB_RAT    | Q07266 | 1.24E+07 | 1.71E+07 | 2.20E+07 | 1.72E+07 | 7.14E+06 | 3.02E+07 | 5.30E+06 | 1.42E+07 | 0.3  | 0.31  | 0.74 | 0.50 |
| VIME_RAT    | P31000 | 1.65E+08 | 5.66E+07 | 7.46E+07 | 9.88E+07 | 1.31E+08 | 6.42E+07 | 5.97E+07 | 8.49E+07 | 0.2  | 0.31  | 0.75 | 0.49 |
| MYO5A_RAT   | Q9QYF3 | 1.70E+08 | 3.21E+08 | 2.51E+08 | 2.47E+08 | 1.78E+08 | 4.26E+08 | 2.23E+08 | 2.76E+08 | -0.2 | -0.29 | 0.76 | 0.49 |
| BASP_MOUSE  | Q91XV3 | 2.42E+08 | 2.52E+08 | 3.26E+08 | 2.73E+08 | 2.47E+08 | 3.99E+08 | 2.31E+08 | 2.92E+08 | -0.1 | -0.29 | 0.77 | 0.49 |
| DLG2_RAT    | Q63622 | 1.61E+08 | 2.77E+08 | 5.61E+07 | 1.65E+08 | 1.20E+08 | 1.34E+08 | 1.77E+08 | 1.44E+08 | 0.2  | 0.29  | 0.77 | 0.49 |
| NFASC_RAT   | P97685 | 4.04E+08 | 7.46E+08 | 5.68E+08 | 5.73E+08 | 4.12E+08 | 3.54E+08 | 7.92E+08 | 5.19E+08 | 0.1  | 0.28  | 0.77 | 0.49 |
| ADDB_RAT    | Q05764 | 3.73E+07 | 7.53E+07 | 4.90E+07 | 5.39E+07 | 7.51E+06 | 6.16E+07 | 7.10E+07 | 4.67E+07 | 0.2  | 0.28  | 0.77 | 0.48 |
| RIMB2_RAT   | Q9JIR1 | 1.44E+07 | 2.60E+06 | 9.33E+06 | 8.79E+06 | 3.03E+05 | 2.39E+07 | 9.22E+06 | 1.11E+07 | -0.3 | -0.28 | 0.77 | 0.48 |
| VAOD1_MOUSE | P51863 | 7.67E+07 | 4.38E+08 | 1.64E+08 | 2.26E+08 | 2.38E+08 | 1.13E+08 | 2.22E+08 | 1.91E+08 | 0.2  | 0.28  | 0.77 | 0.48 |
| NMDE1_RAT   | Q00959 | 8.31E+06 | 2.77E+07 | 4.02E+07 | 2.54E+07 | 6.26E+06 | 2.65E+07 | 3.23E+07 | 2.17E+07 | 0.2  | 0.27  | 0.78 | 0.48 |
| CYB5B_RAT   | P04166 | 1.49E+07 | 4.31E+07 | 2.09E+07 | 2.63E+07 | 1.52E+06 | 6.68E+07 | 2.92E+07 | 3.25E+07 | -0.3 | -0.27 | 0.78 | 0.48 |
| VDAC2_RAT   | P81155 | 2.01E+09 | 2.78E+09 | 2.53E+09 | 2.44E+09 | 1.55E+09 | 2.70E+09 | 3.65E+09 | 2.63E+09 | -0.1 | -0.27 | 0.78 | 0.48 |
| CNTP1_RAT   | P97846 | 3.17E+08 | 3.02E+08 | 1.80E+08 | 2.66E+08 | 9.39E+07 | 3.45E+08 | 2.84E+08 | 2.41E+08 | 0.1  | 0.26  | 0.79 | 0.48 |
| PTPRS_RAT   | Q64605 | 7.92E+06 | 3.64E+07 | 2.74E+07 | 2.39E+07 | 1.33E+07 | 3.81E+07 | 9.86E+06 | 2.04E+07 | 0.2  | 0.26  | 0.79 | 0.47 |
| BEGIN_RAT   | O88881 | 5.81E+06 | 1.89E+06 | 1.64E+07 | 8.03E+06 | 4.16E+06 | 1.59E+07 | 8.29E+06 | 9.45E+06 | -0.2 | -0.23 | 0.81 | 0.46 |
| ACTN4_RAT   | Q9QXQ0 | 5.29E+07 | 2.55E+07 | 2.45E+07 | 3.43E+07 | 6.81E+05 | 3.07E+07 | 9.31E+07 | 4.15E+07 | -0.3 | -0.23 | 0.82 | 0.46 |
| SEPT2_RAT   | Q91Y81 | 1.08E+07 | 7.31E+07 | 1.44E+07 | 3.27E+07 | 1.07E+06 | 1.74E+07 | 5.99E+07 | 2.61E+07 | 0.3  | 0.23  | 0.82 | 0.46 |
| HXK1_RAT    | P05708 | 1.03E+09 | 1.46E+09 | 1.62E+09 | 1.37E+09 | 6.84E+08 | 1.59E+09 | 2.19E+09 | 1.49E+09 | -0.1 | -0.22 | 0.82 | 0.46 |
| RGRF1_RAT   | P28818 | 2.03E+06 | 2.05E+06 | 8.71E+05 | 1.65E+06 | 1.92E+06 | 1.85E+06 | 8.00E+05 | 1.52E+06 | 0.1  | 0.22  | 0.82 | 0.46 |
| ACSL6_RAT   | P33124 | 5.13E+06 | 1.05E+07 | 4.18E+06 | 6.59E+06 | 4.83E+06 | 1.19E+07 | 1.69E+05 | 5.63E+06 | 0.2  | 0.22  | 0.82 | 0.46 |
| LRRC7_RAT   | P70587 | 4.14E+07 | 6.61E+08 | 2.02E+09 | 9.09E+08 | 6.42E+08 | 8.19E+08 | 8.46E+08 | 7.69E+08 | 0.2  | 0.22  | 0.82 | 0.46 |
| SEPT5_MOUSE | Q9Z2Q6 | 4.04E+07 | 1.95E+08 | 9.67E+07 | 1.11E+08 | 6.59E+07 | 1.25E+08 | 1.08E+08 | 9.95E+07 | 0.2  | 0.21  | 0.83 | 0.45 |
| SPTA2_RAT   | P16086 | 4.38E+09 | 2.52E+09 | 2.42E+09 | 3.11E+09 | 1.71E+09 | 3.05E+09 | 3.95E+09 | 2.91E+09 | 0.1  | 0.20  | 0.83 | 0.45 |
| SPA2L_MOUSE | Q8BNN1 | 1.09E+06 | 4.65E+05 | 1.62E+06 | 1.06E+06 | 4.32E+05 | 9.32E+05 | 1.51E+06 | 9.58E+05 | 0.1  | 0.20  | 0.84 | 0.45 |
| COR1C_MOUSE | Q9WUM4 | 3.60E+06 | 1.34E+07 | 6.59E+07 | 2.76E+07 | 2.29E+07 | 2.75E+07 | 4.58E+07 | 3.21E+07 | -0.2 | -0.19 | 0.84 | 0.45 |
| FYN_RAT     | Q62844 | 5.26E+07 | 3.33E+07 | 3.65E+07 | 4.08E+07 | 2.27E+07 | 4.79E+07 | 4.53E+07 | 3.86E+07 | 0.1  | 0.19  | 0.84 | 0.45 |
| CTNB1_RAT   | Q9WU82 | 7.96E+07 | 1.45E+08 | 1.15E+08 | 1.13E+08 | 6.47E+07 | 1.18E+08 | 1.39E+08 | 1.07E+08 | 0.1  | 0.19  | 0.84 | 0.45 |
| AT1A3_RAT   | P06687 | 3.95E+08 | 9.21E+08 | 6.23E+08 | 6.46E+08 | 3.87E+08 | 6.92E+08 | 7.43E+08 | 6.08E+08 | 0.1  | 0.19  | 0.85 | 0.44 |
| CHCH3_MOUSE | Q9CRB9 | 9.05E+07 | 1.09E+08 | 5.70E+07 | 8.56E+07 | 4.94E+07 | 1.12E+08 | 1.11E+08 | 9.08E+07 | -0.1 | -0.18 | 0.85 | 0.44 |
| CAD13_MOUSE | Q9WTR5 | 1.33E+06 | 3.56E+06 | 4.31E+06 | 3.07E+06 | 2.02E+06 | 5.43E+06 | 2.56E+06 | 3.34E+06 | -0.1 | -0.18 | 0.85 | 0.44 |
| MACF1_MOUSE | Q9QXZ0 | 6.19E+06 | 4.74E+06 | 1.14E+07 | 7.45E+06 | 2.82E+06 | 1.23E+07 | 5.33E+06 | 6.80E+06 | 0.1  | 0.17  | 0.86 | 0.44 |
| CTNA2_MOUSE | Q61301 | 7.18E+07 | 5.37E+07 | 4.96E+07 | 5.84E+07 | 2.58E+07 | 6.73E+07 | 7.29E+07 | 5.53E+07 | 0.1  | 0.17  | 0.86 | 0.44 |
| CD47_RAT    | P97829 | 3.93E+07 | 9.83E+06 | 6.87E+07 | 3.93E+07 | 2.31E+07 | 3.52E+07 | 7.13E+07 | 4.32E+07 | -0.1 | -0.16 | 0.87 | 0.43 |
| THY1_RAT    | P01830 | 3.22E+08 | 8.12E+08 | 6.37E+08 | 5.90E+08 | 2.39E+08 | 7.51E+08 | 9.09E+08 | 6.33E+08 | -0.1 | -0.16 | 0.87 | 0.43 |
| TOM22_MOUSE | Q9CPQ3 | 7.30E+06 | 3.02E+07 | 1.28E+07 | 1.68E+07 | 5.74E+06 | 2.08E+07 | 1.94E+07 | 1.53E+07 | 0.1  | 0.16  | 0.87 | 0.43 |
| QCR1_RAT    | Q68FY0 | 4.86E+06 | 1.41E+08 | 8.10E+07 | 7.55E+07 | 5.93E+07 | 8.16E+07 | 6.58E+07 | 6.89E+07 | 0.1  | 0.15  | 0.88 | 0.43 |
| ACTBL_HUMAN | Q562R1 | 3.67E+09 | 4.35E+09 | 4.71E+09 | 4.24E+09 | 2.02E+09 | 5.48E+09 | 4.69E+09 | 4.06E+09 | 0.1  | 0.15  | 0.88 | 0.43 |
| OPCM_RAT    | P32736 | 3.74E+07 | 4.40E+07 | 7.99E+07 | 5.38E+07 | 7.52E+07 | 4.44E+07 | 4.95E+07 | 5.64E+07 | -0.1 | -0.15 | 0.88 | 0.43 |
| DJC11_MOUSE | Q5U458 | 7.68E+06 | 2.52E+07 | 1.48E+07 | 1.59E+07 | 6.04E+06 | 1.73E+07 | 2.79E+07 | 1.71E+07 | -0.1 | -0.13 | 0.89 | 0.42 |
| NDUA4_MOUSE | Q62425 | 2.11E+08 | 1.46E+08 | 1.41E+08 | 1.66E+08 | 1.35E+08 | 1.73E+08 | 1.78E+08 | 1.62E+08 | 0.0  | 0.13  | 0.89 | 0.42 |
| MTCH1_MOUSE | Q791T5 | 4.35E+07 | 5.89E+07 | 5.26E+07 | 5.17E+07 | 1.76E+06 | 6.67E+07 | 7.63E+07 | 4.83E+07 | 0.1  | 0.13  | 0.89 | 0.42 |
| CCG8_RAT    | Q8VHW5 | 2.60E+06 | 2.40E+07 | 2.53E+07 | 1.73E+07 | 1.16E+07 | 1.38E+07 | 2.31E+07 | 1.61E+07 | 0.1  | 0.13  | 0.90 | 0.42 |
| SHAN3_RAT   | Q9JLU4 | 2.54E+07 | 7.33E+07 | 4.81E+07 | 4.89E+07 | 2.65E+07 | 4.96E+07 | 7.89E+07 | 5.17E+07 | -0.1 | -0.12 | 0.90 | 0.42 |
| DLG1_RAT    | Q62696 | 1.71E+07 | 1.45E+07 | 1.52E+07 | 1.56E+07 | 1.17E+07 | 7.68E+06 | 2.54E+07 | 1.49E+07 | 0.1  | 0.12  | 0.90 | 0.42 |
| KCAB2_RAT   | P62483 | 8.47E+05 | 1.31E+07 | 6.80E+06 | 6.91E+06 | 8.48E+05 | 1.11E+07 | 1.05E+07 | 7.48E+06 | -0.1 | -0.11 | 0.91 | 0.41 |
| ABL1_MOUSE  | Q8K4G5 | 5.11E+06 | 1.07E+07 | 5.58E+07 | 2.39E+07 | 4.10E+05 | 5.52E+06 | 5.72E+07 | 2.10E+07 | 0.2  | 0.11  | 0.91 | 0.41 |

Supplementary Table 3



Supplementary Table 3

|             |        |          |          |          |          |          |          |          |          |      |       |      |      |
|-------------|--------|----------|----------|----------|----------|----------|----------|----------|----------|------|-------|------|------|
| SUCB1_MOUSE | Q9Z2I9 | 1.24E+07 | 4.27E+06 | 7.47E+06 | 8.04E+06 | 1.92E+06 | 8.20E+06 | 1.56E+07 | 8.58E+06 | -0.1 | -0.11 | 0.91 | 0.41 |
| WASF1_RAT   | Q5BJU7 | 1.46E+07 | 3.54E+07 | 2.75E+07 | 2.58E+07 | 6.82E+06 | 3.20E+07 | 4.30E+07 | 2.73E+07 | -0.1 | -0.10 | 0.91 | 0.41 |
| MINK1_MOUSE | Q9JM52 | 3.60E+07 | 3.02E+07 | 1.80E+07 | 2.80E+07 | 4.56E+06 | 4.54E+07 | 3.86E+07 | 2.95E+07 | -0.1 | -0.10 | 0.92 | 0.41 |
| GRM5_RAT    | P31424 | 2.12E+07 | 8.37E+06 | 6.99E+05 | 1.01E+07 | 4.17E+06 | 1.49E+07 | 9.07E+06 | 9.36E+06 | 0.1  | 0.10  | 0.92 | 0.41 |
| CNTN1_RAT   | Q63198 | 1.37E+09 | 1.56E+09 | 1.75E+09 | 1.56E+09 | 1.02E+09 | 1.84E+09 | 1.92E+09 | 1.59E+09 | 0.0  | -0.10 | 0.92 | 0.41 |
| NEGR1_RAT   | Q9Z0J8 | 4.85E+07 | 4.81E+07 | 5.25E+07 | 4.97E+07 | 2.03E+07 | 7.10E+07 | 5.38E+07 | 4.84E+07 | 0.0  | 0.08  | 0.93 | 0.40 |
| TMM11_RAT   | B0BN86 | 9.43E+06 | 3.99E+06 | 2.43E+06 | 5.28E+06 | 8.14E+05 | 9.57E+05 | 1.29E+07 | 4.88E+06 | 0.1  | 0.08  | 0.93 | 0.40 |
| GRIA2_RAT   | P19491 | 9.73E+07 | 2.01E+08 | 1.58E+08 | 1.52E+08 | 7.69E+07 | 1.94E+08 | 1.99E+08 | 1.56E+08 | 0.0  | -0.08 | 0.93 | 0.40 |
| CMC1_MOUSE  | Q8BH59 | 3.30E+07 | 9.40E+07 | 4.04E+07 | 5.58E+07 | 5.24E+07 | 4.36E+07 | 6.64E+07 | 5.41E+07 | 0.0  | 0.08  | 0.94 | 0.40 |
| RASK_RAT    | P08644 | 4.11E+05 | 2.13E+06 | 1.66E+07 | 6.37E+06 | 4.01E+06 | 9.93E+06 | 6.33E+06 | 6.76E+06 | -0.1 | -0.07 | 0.95 | 0.40 |
| RLA2_RAT    | P02401 | 1.30E+07 | 2.94E+07 | 2.19E+07 | 2.14E+07 | 3.59E+06 | 3.76E+07 | 2.07E+07 | 2.06E+07 | 0.1  | 0.06  | 0.95 | 0.40 |
| AT1A2_RAT   | P06686 | 2.72E+08 | 7.13E+08 | 5.03E+08 | 4.96E+08 | 3.01E+08 | 5.76E+08 | 5.79E+08 | 4.85E+08 | 0.0  | 0.06  | 0.95 | 0.40 |
| RB6I2_RAT   | Q811U3 | 1.12E+08 | 1.17E+08 | 1.46E+08 | 1.25E+08 | 8.52E+07 | 1.36E+08 | 1.49E+08 | 1.24E+08 | 0.0  | 0.05  | 0.96 | 0.39 |
| VDAC3_RAT   | Q9R1Z0 | 1.32E+09 | 1.63E+09 | 1.32E+09 | 1.42E+09 | 7.36E+08 | 1.46E+09 | 2.02E+09 | 1.40E+09 | 0.0  | 0.05  | 0.96 | 0.39 |
| STXB1_RAT   | P61765 | 1.95E+07 | 3.63E+08 | 4.97E+07 | 1.44E+08 | 2.82E+07 | 3.00E+07 | 3.51E+08 | 1.36E+08 | 0.1  | 0.04  | 0.96 | 0.39 |
| SNIP_RAT    | Q9QXY2 | 2.63E+08 | 4.05E+08 | 3.81E+08 | 3.49E+08 | 1.72E+08 | 4.71E+08 | 4.19E+08 | 3.54E+08 | 0.0  | -0.04 | 0.96 | 0.39 |
| PDE2A_RAT   | Q01062 | 5.99E+06 | 2.47E+07 | 1.05E+08 | 4.52E+07 | 6.34E+06 | 8.74E+07 | 3.73E+07 | 4.37E+07 | 0.0  | 0.04  | 0.97 | 0.39 |
| SNPH_MOUSE  | Q80U23 | 4.56E+05 | 4.74E+06 | 1.25E+07 | 5.90E+06 | 8.19E+05 | 3.85E+05 | 1.61E+07 | 5.76E+06 | 0.0  | 0.02  | 0.98 | 0.38 |
| AP2A1_MOUSE | P17426 | 6.35E+07 | 1.10E+08 | 1.29E+08 | 1.01E+08 | 8.30E+07 | 7.46E+07 | 1.43E+08 | 1.00E+08 | 0.0  | 0.02  | 0.99 | 0.38 |
| UBIQ_RAT    | P62989 | 5.12E+07 | 4.34E+07 | 6.60E+07 | 5.35E+07 | 3.57E+07 | 6.10E+07 | 6.40E+07 | 5.36E+07 | 0.0  | 0.00  | 1.00 | 0.38 |

Supplemental Table 4

| ID | Molecules in Network                                                                                                                                                                                                                                                                                                                                                                                                                                                                                                                                                                                                                                                                                                                                                      | Score* |
|----|---------------------------------------------------------------------------------------------------------------------------------------------------------------------------------------------------------------------------------------------------------------------------------------------------------------------------------------------------------------------------------------------------------------------------------------------------------------------------------------------------------------------------------------------------------------------------------------------------------------------------------------------------------------------------------------------------------------------------------------------------------------------------|--------|
| 1  | ACO2, adenosine-tetraphosphatase, ARHGEF6/7, ATP synthase, ATP5A1, ATP5B, ATP5J, ATP5O, ATP6V0A1, ATP6V0D1, ATP6V1A, ATP6V1B2, ATP6V1C1, ATP6V1E1, ATP6V1F, ATP6V1G1, ATP6V1H, BSN, CASKIN1, CPLX1, DLAT, DLD, DLST, ERC1, ERC2, GIT1, GPHN, H+-exporting ATPase, H+-transporting two-sector ATPase, IDH3B, MAP4, MTCH2, OGDH, PCLO, PDHB, PFN2, PI3K (complex), PIP4K2A, PPFIA2, PPFIA3 (includes EG:8541), Profilin, PTPRD, PTPRS, RAB10, RAB35, RAPGEF4, RIMS1, RIMS2, RPS10, SEPT2, SEPT3, SEPT4, SEPT5, SEPT6, SEPT7, SEPT8, SEPT9, SEPT11, Septin, SLC27A1, SNAP25, STXBP1, SYN1, SYN2, SYN3, TUBB2A, UBA52, UNC13A, Vacuolar H+ ATPase, VAMP2                                                                                                                      | 94     |
| 2  | 3-hydroxyacyl-CoA dehydrogenase, ACAT1, acetyl-CoA C-acetyltransferase, Ant, AP-3, BCAS1, Beta Tubulin, CCDC92 (includes EG:80212), CNKSR2, CRMP, CRMP1, CYC1, Cytochrome bc1, Cytochrome c, Cytochrome c oxidase, Cytokeratin, DPYSL4, DYNLL1, EPHA4, FAM82A2, GAPDH (includes EG:2597), HADHA, HADHB, HSD17B10, Jnk, KRT5, KRT9, KRT10, LRRC59, MAP1LC3A, MAPK8IP3, MTCH1, NADH dehydrogenase, NADH2 dehydrogenase, NADH2 dehydrogenase (ubiquinone), NDUFA4, NDUFA8, NDUFA13, NDUFA10 (includes EG:678759), NDUFA9 (includes EG:362440), NDUFB10, NDUFC2, NDUFS1, NDUFS3, NDUFV1, NDUFV2, NDUFV3, OPA1, PACS1, PPP2R1A, RHOG, SLC25A3, SLC25A4, SLC25A6, SNPH, TFAM, TNIK, TOMM20, TOMM22, TOMM70A, TRIO, UQCRB, UQCRC2, UQCRFS1, VAPA, VAPB, VDAC1, VDAC2, VDAC3, VIM | 82     |
| 3  | ABI1, ABI2, ABI-2-CYFIP2-HSPC300-NCKAP1-WAVE, ACTN2, ACTR3, AKAP5, Ampa Receptor, Arp2/3, ARPC2, ARPC3, ARPC4, ARPC1A, ATP2B2, BAIAP2, C3ORF10, Camk, CAMK2A, CAMK2B, CaMKII, CORO1A, CYFIP2 (includes EG:26999), DLG1, DLG2, DLG3, DLG4, DLGAP1, DLGAP2, DLGAP3, DLGAP4, DNMT3, DYNLL2, FCGR1A/2A/3A, FLOT1, FLOT2, G-Actin, GRI, GRIA, GRIA1, GRIA2, GRIA3, GRIA4, GRIN1, GRIN2A, GRIN2B, GRIP1, Guk, Homer, HOMER1, HOMER2, HOMER3, IRSp53-WAVE, ITPR, KALRN, KCNJ4, LRRC7, MAP1A, NCKAP1, NFkB (complex), NLGN2, NMDA Receptor, NPTN, PTPLAD1, SHANK1, SHANK2, SHANK3, SPTAN1, SYNGAP1, TMOD2, WASF1, WASF3                                                                                                                                                           | 79     |
| 4  | AAK1, ADAM11, ADAM22, ADAM23, Adaptor protein 2, ADD3, ANK2, ANK3, Ap1 gamma, Ap2 alpha, AP2A1, AP2A2, AP2B1, AP2M1, AP2S1, ATP1A1, ATP1A2, ATP1A3, ATP1B1, BCAN, Beta adaptin, BIN1, cacn, CACNA1A, CACNA1E, Cacna2d, CACNA2D1, CACNA2D3, Cacnb, CACNB1, CACNB2, CACNB3, CACNB4, CACNG8, Clathrin, CLTC, CNTN1, CNTNAP1, DBNL, DNM1, Dynamin, ERK1/2, FXD7, GABAR-A, GABRB3, KCNA1, KCNA2, KCNA3, KCNAB2, L1CAM, LGI1, Metalloprotease, MYO6, N-type Calcium Channel, Na+,K+ -ATPase, Na-k-atpase, NCAN, Ncx, NFASC, RLN3, SCN2A, SGIP1, SNAP91, SPTBN4, STX1B, SYNJ1, Syntaxin, SYT1, SYT7, TNR                                                                                                                                                                         | 75     |
| 5  | ABLIM1, ABLIM2, ACTB, Actin, ACTN4, ACTR1A, ADD1, ADD2, Adducin, AGAP2, Akt, Alpha Actinin, Alpha catenin, ANKS1B, Cadherin, Cadherin (E,N,P,VE), CAPZA2, CDH2, CDH13, CFL1, Cofilin, CORO2B, CPNE4, CTNNA2, CTNND2, DBN1, DCTN1, DCTN2, DPYSL2, DST, Dynein, EF-1 alpha, EPB41L3, Erm, F Actin, Fascin, Gamma tubulin, GNA12, GNAZ, INA, INPP4A, IQSEC1, ITPKA, JUP, KIAA1217, MARK4, Mlc, MYH9, MYH10, MYH14, MYL1, Myosin, NEFH, NEFL, NEFM, peptidase, PHACTR1, PKP4, PLEC, PP1 protein complex group, RAB15, Rock, RPH3A, SPTBN1, SPTBN2, SYNPO, THY1, TJP1, TPM3, Tropomyosin                                                                                                                                                                                       | 64     |
|    | *Ingenuity Pathway Analysis calculates a score for each network that indicates the likelihood that this set of focus genes in a network could be explained by random chance alone. The score is generated by taking into account the number of network eligible molecules, the size of the network, and the total number of molecules in the Ingenuity knowledge base that can be included in networks. The score is calculated using a right-tailed Fisher's Exact Test and is displayed as the negative log of that p-value. A score of 6 indicates that there is a 1 in million chance of deriving this network due to random chance.                                                                                                                                  |        |

Supplementary Table 5

| Protein Name | Log2 fold change<br>Lithium/ Control | Log2 fold change<br>Valproate/ Control | Description                                             |
|--------------|--------------------------------------|----------------------------------------|---------------------------------------------------------|
| PCLO_RAT     | 0.3                                  | -0.4                                   | Protein piccolo                                         |
| DLG4_RAT     | -0.7                                 | -1.0                                   | Disks large homolog<br>4                                |
| DLG3_HUMAN   | -0.2                                 | 0.4                                    | Disks large homolog<br>3                                |
| DLG2_RAT     | -0.4                                 | 0.2                                    | Disks large homolog<br>2                                |
| SHAN1_RAT    | -0.1                                 | -0.2                                   | SH3 and multiple<br>anky repeat domains<br>protein 1    |
| SHAN3_RAT    | 0.2                                  | -0.1                                   | SH3 and multiple<br>ankyrin repeat<br>domains protein 3 |
| HOME3_RAT    | 0.2                                  | -0.3                                   | Homer protein<br>homolog 3                              |
| HOME1_RAT    | -0.5                                 | -0.4                                   | Homer protein<br>homolog 1                              |
